# Supplementary material for: Hippocampal replay of experience at real-world speeds
Source: eLife. 2021 Sep 27;10:e64505. doi: 10.7554/eLife.64505 (PMC8476125; doi:10.7554/eLife.64505)
Supplement: Figure 3—source data 1. [file elife-64505-fig3-data1.csv]

Animal ID	day	epoch	ripple_number	start_time	end_time	duration	is_classified	n_unique_spiking	n_total_spikes	median_fraction_spikes_under_6_ms	median_spikes_per_bin	population_rate	actual_x_position	actual_y_position	actual_linear_distance	actual_linear_position	actual_speed	actual_velocity_center_well	replay_distance_from_actual_position	replay_speed	replay_velocity_actual_position	replay_velocity_center_well	replay_distance_from_center_well	replay_linear_position	replay_total_distance	replay_total_displacement	state_order	spatial_coverage	spatial_coverage_percentage	mean_ripple_consensus_trace_zscore	max_ripple_consensus_trace_zscore	n_ripples	Continuous	Continuous_max_probability	Continuous_duration	Continuous_fraction_of_time	Continuous_replay_distance_from_actual_position	Continuous_replay_speed	Continuous_replay_velocity_actual_position	Continuous_replay_velocity_center_well	Continuous_replay_distance_from_center_well	Continuous_replay_linear_position	Continuous_replay_total_distance	Continuous_min_time	Continuous_max_time	Continuous_n_unique_spiking	Continuous_n_total_spikes	Continuous_median_fraction_spikes_under_6_ms	Continuous_population_rate
cor	1	2	1	0 days 00:22:39.771534985	0 days 00:22:39.809534988	0.038000003	True	10.0	21.0	0.5	1.0	50.23923444976077	279.99634478564116	169.54735387001696	24.789782513287378	24.789782513287378	3.5223888232589404	1.1284700116506934	17.100269912582938	776.7184445156003	4.406030294971161	7.41956204077915e-13	7.689512600704446	7.689512600704443	29.515300891592823	0.0	['Hover-Continuous-Mix', 'Unclassified']	56.07907169402637	0.2043010752688172	2.7430460160295103	5.20596544991677	1.0	False	0.4330000809086933	0.0	0.0
cor	1	2	2	0 days 00:23:00.114870107	0 days 00:23:00.142870110	0.028000003	True	5.0	11.0	0.3	1.0	35.714285714285715	289.69555163051626	130.5876026458598	64.20948291633395	64.20948291633395	1.4196800054466998	11.164903118166745	8.10300426806843	0.0	-2.5817117564649967	1.0150610510858582e-12	72.31248718440237	72.31248718440237	4.263256414560601e-14	1.4210854715202004e-14	['Hover']	25.29882933565099	0.0921658986175115	2.042132079178791	3.1959456198333167	1.0	False	0.14538107920813126	0.0	0.0
cor	1	2	3	0 days 00:23:16.240204859	0 days 00:23:16.308871531	0.068666672	True	9.0	33.0	0.0	1.0	44.11764705882353	270.04272590966167	190.32492658301715	3.5131182166777544	3.5131182166777544	0.6686408918490762	-3.9909111382798086	9.768767184539014	0.0	-0.09744530129037147	-6.269494727295003e-16	13.281885401216767	13.281885401216764	3.0198066269804264e-14	1.7763568394002505e-15	['Hover-Continuous-Mix', 'Hover']	16.320225198880742	0.05945604048070841	1.21599732635191	2.6516907396974103	1.0	False	0.25317572510384445	0.0	0.0
cor	1	2	4	0 days 00:23:21.014871945	0 days 00:23:21.102871953	0.088000008	True	9.0	115.0	0.6	2.0	118.801652892562	279.29999999999984	198.36	0.0	0.0	0.0017866907956531196	-0.08093685431518201	32.52474267902731	1976.5746315669187	1976.5746315667307	1976.5746315667307	32.52474267902731	38.21088574684652	173.9385675778727	173.9385675778727	['Continuous', 'Fragmented-Continuous-Mix', 'Unclassified']	42.528865375613286	0.1549364613880743	5.365407226260488	11.407677259627516	1.0	True	0.9840896416643141	0.078	0.8863636363636364	23.952801877408014	613.1807052974223	605.4420695711341	605.4420695711341	23.952801877408014	[23.95280188]	47.22448142654851	0.0	0.076	9.0	112.0	0.6	130.53613053613054
cor	1	2	5	0 days 00:23:21.862205353	0 days 00:23:21.910205357	0.048000004000000006	True	9.0	34.0	0.3333333333333333	1.0	64.39393939393939	279.29999999999995	198.36	0.0	0.0	0.04749080326000021	-0.016879949667066532	1.4757650445796409	0.0	0.0	0.0	1.4757650445796409	1.4757650445796409	0.0	0.0	['Hover-Continuous-Mix', 'Unclassified']	54.726287069828366	0.19937275985663086	2.945590041813329	4.938526294211378	1.0	False	0.4714844218296419	0.0	0.0
cor	1	2	6	0 days 00:23:22.428205403	0 days 00:23:22.490205408	0.062000005	True	10.0	67.0	0.6666666666666666	2.0	98.24046920821114	279.30114548446727	198.3082055674208	0.0	0.0	0.07962905254086436	-0.004744524911556021	68.75065301040101	2424.6181752357184	2424.618175235455	2424.618175235455	68.75065301040101	92.96261704111508	150.32632686459846	150.32632686459846	['Unclassified', 'Fragmented-Continuous-Mix', 'Unclassified', 'Hover-Continuous-Mix', 'Unclassified']	126.63016188973693	0.4613250086715226	5.053515815030372	11.182791802502578	1.0	False	0.7814264614109452	0.0	0.0
cor	1	2	7	0 days 00:23:22.716205428	0 days 00:23:22.787538768	0.07133334000000001	True	9.0	36.0	0.3333333333333333	1.0	46.753246753246756	279.3009058043982	198.30894879921036	0.0	0.0	0.030506960228984376	-0.002320393968280809	1.4757650445796406	0.0	0.0	0.0	1.4757650445796406	1.4757650445796406	0.0	0.0	['Hover-Continuous-Mix']	19.5644280195701	0.07127496159754225	0.9937533807081672	4.685402615202532	1.0	False	0.34327108378969345	0.0	0.0
cor	1	2	8	0 days 00:23:23.350205484	0 days 00:23:23.419538823	0.06933333900000001	True	10.0	35.0	0.25	1.0	46.791443850267385	279.2999999999999	198.36	0.0	0.0	0.11269501903435475	-5.7465187221644105e-05	120.77664145753543	5534.573309634994	2102.1691417896977	2102.1691417896977	120.77664145753543	192.00628270307755	764.9995992155009	144.42326668627987	['Fragmented', 'Unclassified', 'Hover']	142.28111223917838	0.5183428209993675	2.051651961225199	4.181058849262134	1.0	False	0.15702136285168544	0.0	0.0
cor	1	2	9	0 days 00:23:25.294872322	0 days 00:23:25.356872327	0.062000005	True	9.0	68.0	0.6666666666666666	2.0	99.7067448680352	279.378044181235	198.32651538464125	0.0	0.0	0.7389103055811076	0.0	17.375943266824795	380.8425921495847	-380.8425921495847	-380.8425921495847	17.375943266824795	17.375943266824795	23.61224071327425	23.61224071327425	['Unclassified', 'Fragmented-Continuous-Mix', 'Continuous']	54.84133326954022	0.1997918834547346	5.908856708187482	16.077084971970987	1.0	True	0.931840700302368	0.046	0.7419354838709677	14.821814143386824	463.5500660970554	-449.1458831329339	-449.1458831329339	14.821814143386824	[14.82181414]	20.66071062411497	0.016	0.06	9.0	59.0	0.75	116.600790513834
cor	1	2	10	0 days 00:23:26.346872414	0 days 00:23:26.408872420	0.062000005999999996	True	11.0	46.0	0.4166666666666666	1.0	67.44868035190615	280.30386021731306	198.32733934508076	0.0	0.0	0.1552045336264775	0.0	10.520776608132275	428.4479161682828	428.44791616828286	428.44791616828286	10.520776608132275	10.520776608132278	26.563770802433535	26.563770802433528	['Unclassified', 'Hover-Continuous-Mix', 'Continuous']	44.558583281501406	0.16233090530697186	3.2131573385385983	8.190295771909161	1.0	True	0.9345672086265184	0.044000000000000004	0.7096774193548387	14.22100861140381	598.6692818627557	603.7220636916712	603.7220636916712	14.22100861140381	[14.22100861]	26.563770802433535	0.018000000000000002	0.06	10.0	40.0	0.4166666666666666	82.64462809917356
cor	1	2	11	0 days 00:23:26.411539086	0 days 00:23:26.474872425	0.063333339	True	9.0	61.0	0.375	2.0	86.64772727272728	280.4227678370676	198.3588637021563	0.0	0.0	0.1126600587171178	0.0	50.63718809213891	530.3530628958083	530.3530628958086	530.3530628958086	50.63718809213891	50.6371880921389	32.466830980752064	32.466830980752064	['Continuous', 'Hover-Continuous-Mix', 'Unclassified']	39.84565620365032	0.14516129032258066	2.355504851493874	4.687758734569705	1.0	True	0.9571942622487316	0.057999999999999996	0.90625	49.31090786888523	584.6588137111198	585.2171728505475	585.2171728505475	49.31090786888523	[49.31090787]	32.466830980752064	0.0	0.055999999999999994	9.0	60.0	0.3333333333333333	94.04388714733544
cor	1	2	12	0 days 00:23:27.292872497	0 days 00:23:27.343539168	0.050666670999999996	False	10.0	30.0	0.5	1.0	54.54545454545454	280.4409096358401	198.36	0.0	0.0	0.3722306373842005	0.0	36.26347856015417	8696.928378894445	1739.385675778721	1739.385675778721	36.26347856015417	61.282508058558705	347.8771351557453	0.0	['Unclassified']	208.73220790534444	0.7604301075268818	3.84273003311852	7.2686435867789365	1.0	False	0.1966916979373708	0.0	0.0
cor	1	2	13	0 days 00:23:27.991539225	0 days 00:23:28.076205900	0.08466667500000001	True	10.0	69.0	0.325	1.0	72.93868921775898	279.51484845653647	198.36	0.0	0.0	0.07846536822038741	0.0	36.894126114491	652.0822290003064	652.082229000306	652.082229000306	36.894126114491	36.894126114491	56.079071694026325	56.079071694026325	['Hover-Continuous-Mix', 'Unclassified', 'Fragmented-Continuous-Mix', 'Continuous', 'Hover-Continuous-Mix']	70.49352096666473	0.2568142035508877	1.8273636455262103	4.482939992792992	1.0	True	0.8700595154027498	0.046	0.5348837209302325	44.72209722052217	640.9329578588267	641.6369759041906	641.6369759041906	44.72209722052217	[44.72209722]	29.515300891592787	0.027999999999999997	0.07200000000000001	9.0	48.0	0.4	94.86166007905138
cor	1	2	14	0 days 00:23:29.520206027	0 days 00:23:29.593539366	0.07333333900000001	True	9.0	68.0	0.3333333333333333	1.5	85.85858585858584	279.7800473515678	198.35999999999996	0.0	0.0	0.17023032142046068	0.0	45.74871638196888	778.8759957503657	696.8890488292751	696.8890488292751	45.74871638196888	45.74871638196883	56.079071694026354	50.17601151570779	['Unclassified', 'Hover-Continuous-Mix', 'Unclassified']	97.6464537830196	0.35573476702508955	2.182847431256884	5.776578702478801	1.0	False	0.6669036518483827	0.0	0.0
cor	1	2	15	0 days 00:23:30.382872769	0 days 00:23:30.438872774	0.056000005000000005	True	11.0	51.0	0.125	1.0	82.79220779220779	280.44028126382847	198.35955676348752	0.0	0.0	0.23302813577283285	0.0	142.13992783062056	5287.314212727135	795.8914565657243	795.8914565657243	142.13992783062056	250.9714828237828	481.69909974447313	44.56992156768078	['Unclassified', 'Fragmented-Continuous-Mix', 'Fragmented', 'Unclassified']	238.12523112181495	0.8675115207373271	1.8427340197737665	3.488311536687881	2.0	False	0.37352233460117495	0.0	0.0
cor	1	2	16	0 days 00:23:30.818206141	0 days 00:23:30.870206145	0.052000004	True	11.0	52.0	0.5	2.0	90.9090909090909	280.3897431048684	198.35813698421512	0.0	0.0	0.5122157878863577	0.0	41.20790086018536	397.3213581560571	397.3213581560573	397.3213581560573	41.20790086018536	41.207900860185354	20.66071062411497	20.66071062411497	['Continuous', 'Fragmented-Continuous-Mix', 'Unclassified']	47.338001814593106	0.17245657568238215	2.3441467010459425	6.0029024124606245	1.0	True	0.9681902878827195	0.044000000000000004	0.8461538461538461	39.8456562036503	469.49045267238114	469.561605093522	469.561605093522	39.8456562036503	[39.8456562]	20.66071062411497	0.0	0.042	11.0	45.0	0.6333333333333333	92.97520661157024
cor	1	2	17	0 days 00:23:32.747539644	0 days 00:23:32.810872983	0.063333339	True	9.0	48.0	0.25	1.0	68.18181818181817	280.4398150611575	198.35999973769574	0.0	0.0	0.36448364145007617	0.01525475688173947	44.960406939047814	2717.7901184045168	-2717.7901184042607	-2717.7901184042607	44.960406939047814	76.23419381205345	173.9385675778727	173.9385675778727	['Unclassified', 'Hover-Continuous-Mix']	120.64379239438568	0.439516129032258	2.3621452966408367	6.300880256872519	1.0	False	0.5430544308753252	0.0	0.0
cor	1	2	18	0 days 00:23:33.700206394	0 days 00:23:33.773539734	0.07333334000000001	True	10.0	63.0	0.18333333333333332	2.0	79.54545454545455	280.4039878301928	198.09751878077842	0.0	0.0	0.30758835217993963	0.09241603010978744	41.32142124822995	409.9347346054558	409.9347346054558	409.9347346054558	41.32142124822995	41.321421248229925	29.515300891592823	29.515300891592823	['Fragmented-Continuous-Mix', 'Continuous', 'Hover-Continuous-Mix', 'Unclassified']	67.55724426297914	0.2461170848267623	1.5537433554801166	2.827126540133902	1.0	True	0.8585080530981238	0.044000000000000004	0.6111111111111112	42.12638399981884	520.9108674587079	536.6418343925967	536.6418343925967	42.12638399981884	[42.126384]	23.61224071327425	0.012	0.054000000000000006	9.0	40.0	0.25	82.64462809917356
cor	1	2	19	0 days 00:23:35.172873190	0 days 00:23:35.220206528	0.047333337999999996	True	9.0	62.0	0.5	3.0	117.42424242424244	279.9855836072204	197.6512581572907	0.0	0.0	0.6800341481684699	0.7240950937037541	55.7101304328814	61.49021019081837	61.49021019081843	61.49021019081843	55.7101304328814	55.71013043288142	2.9515300891592844	2.9515300891592844	['Unclassified', 'Hover-Continuous-Mix']	51.65177656028743	0.18817204301075266	2.6115930750183884	6.244507386419995	1.0	False	0.5382477756378881	0.0	0.0
cor	1	2	20	0 days 00:23:35.579539893	0 days 00:23:35.661539900	0.082000007	True	9.0	38.0	0.08333333333333333	1.0	42.128603104212864	280.01651780984656	197.4860211913486	0.0	0.0	0.6411270833646057	1.0878049734655686	1.4757650445796406	0.0	0.0	0.0	1.4757650445796406	1.4757650445796406	0.0	0.0	['Hover']	13.605833825636694	0.04956726986624705	1.5099742196967352	4.573464785361818	1.0	False	0.0960046858798916	0.0	0.0
cor	1	2	21	0 days 00:23:35.906206588	0 days 00:23:35.993539929	0.08733334100000001	True	10.0	64.0	0.5	2.0	67.65327695560254	279.16165226851217	197.17049813522544	0.0	0.0	0.7824904686839281	1.402800566945967	27.14721279680224	1287.00439934271	-257.4008798685416	-257.4008798685416	27.14721279680224	27.14721279680224	88.54590267477846	0.0	['Continuous', 'Hover-Continuous-Mix', 'Unclassified']	45.577115795389844	0.1660415103775944	2.1871411181178475	4.793943642364955	2.0	True	0.9479176031083684	0.076	0.8837209302325582	25.86472420236949	574.9818601175788	582.5388333866999	582.5388333866999	25.86472420236949	[25.8647242]	44.27295133738923	0.0	0.07400000000000001	10.0	57.0	0.5454545454545454	68.18181818181817
cor	1	2	22	0 days 00:23:50.988207915	0 days 00:23:51.047541253	0.05933333800000001	True	10.0	35.0	0.0	1.0	54.858934169279	279.95460524672995	121.8479356427801	78.57113242140363	203.66627991342617	0.985959439016018	8.548411452052758	6.258645237001242	0.0	5.109308467484038	-1.2544754507212806e-13	72.31248718440239	72.31248718440239	0.0	0.0	['Hover']	8.854590267477848	0.032258064516129024	1.4281027293367403	2.0770875363201284	0.0	False	0.04758340339515183	0.0	0.0
cor	1	2	23	0 days 00:24:11.671543067	0 days 00:24:11.772876409	0.10133334199999999	True	11.0	78.0	0.3484848484848485	1.0	69.5187165775401	270.5189970647972	178.26299308673526	15.583327205885727	15.583327205885727	2.5794121061508437	14.09575625987766	12.792079818220413	2093.7704102761577	1990.9542127861048	2035.897271272796	25.892721865781226	28.34556789503657	156.15019498150596	150.24713480318738	['Hover-Continuous-Mix', 'Unclassified']	111.75303141503088	0.4071262913767658	2.089259019371242	3.612197568174765	3.0	False	0.6146475636989549	0.0	0.0
cor	1	2	24	0 days 00:24:17.482210245	0 days 00:24:17.542210250	0.060000005	True	10.0	50.0	0.4166666666666666	1.0	75.75757575757576	288.4819950891649	130.57844197605334	64.15420899882831	64.15420899882831	3.69251294576329	9.97066757412668	0.6963120819038036	0.0	4.34136194141349	-1.2126596023639046e-13	63.457896916924504	63.457896916924504	0.0	0.0	['Hover-Continuous-Mix']	17.217258853429147	0.06272401433691756	1.8393480019442023	5.21282708224309	1.0	False	0.3011890196232734	0.0	0.0
cor	1	2	25	0 days 00:24:35.600211838	0 days 00:24:35.647545175	0.047333337	False	10.0	50.0	0.5	2.0	98.81422924901186	249.5234907296381	115.32467405558344	105.58812216641066	230.68326965843326	1.1716569496281874	0.6383581872875727	10.205565257976568	2077.4516940925214	-228.70205700033313	-417.2388352852637	101.84196583128927	226.93711332331188	97.04844198051208	20.678650475378088	['Unclassified']	209.8152911206707	0.76437587657784	1.905621071000896	4.179719261363937	1.0	False	0.4087223798002293	0.0	0.0
cor	1	2	26	0 days 00:24:41.866879056	0 days 00:24:41.914212393	0.047333337	False	10.0	26.0	0.0	1.0	49.24242424242424	250.5527304658732	99.53107741811442	105.58812216641064	230.68326965843318	2.168517453419096	-2.442605095051676	31.142824871853595	2829.8653389913634	2520.3519947717027	1195.3574140444764	123.24009312540659	225.39875155659115	75.12469366373642	57.37715587413498	['Unclassified']	207.95989086534775	0.7576164874551972	2.5121319663952395	5.007097739074784	1.0	False	0.3857738385267025	0.0	0.0
cor	1	2	27	0 days 00:24:42.534212448	0 days 00:24:42.589545786	0.055333337999999996	True	10.0	42.0	0.3333333333333333	1.0	70.7070707070707	250.78210770790483	99.8175928358802	105.58812216641066	230.68326965843318	1.0539000339027935	-4.7924309870918735	1.4528959332811016	54.27986455141895	-0.7447299768945564	-54.2798645514189	104.68547217841272	229.7806196704352	2.9311126857766117	2.9311126857766117	['Hover-Continuous-Mix']	32.90409469766459	0.1198725607327758	3.336486570303857	5.35326318098943	1.0	False	0.4421309955457701	0.0	0.0
cor	1	2	28	0 days 00:25:22.356215950	0 days 00:25:22.439549291	0.08333334099999999	True	10.0	64.0	0.3076923076923077	1.0	70.95343680709534	282.856810544258	135.70541581357972	58.73585119064181	58.73585119064181	1.1524689310541418	9.805872231642338	10.962545985111248	624.8098174324731	-28.82154722342076	215.96561627994774	62.36788904208887	72.98460715126123	58.68549216791096	17.70918053495567	['Hover-Continuous-Mix', 'Unclassified']	112.3741090043327	0.40938893259900333	2.4549816521772927	3.890015578993725	2.0	False	0.7159297580918664	0.0	0.0
cor	1	2	29	0 days 00:25:23.342216037	0 days 00:25:23.371549373	0.029333336	True	10.0	28.0	0.3333333333333333	1.5	90.9090909090909	282.7863181306439	135.59794269353011	58.839430682163936	58.839430682163936	0.036136311608686376	0.800521975163956	3.142701190180953	210.8235777970916	-0.6838778248814769	1.3601818084550466e-13	61.982131872344894	61.98213187234486	5.903060178318569	0.0	['Hover-Continuous-Mix']	26.563770802433528	0.09677419354838708	2.974931613896142	5.146234991673736	1.0	False	0.6823698617491027	0.0	0.0
cor	1	2	30	0 days 00:25:23.515549385	0 days 00:25:23.566882723	0.051333338000000006	True	9.0	28.0	0.0	1.0	48.95104895104895	282.72	135.65999999999997	58.77394037756761	58.77394037756761	0.10222251260291758	-0.6195735947649439	20.971651158719887	56.76019402229387	56.76019402229321	-56.760194022293796	37.80228921884772	37.80228921884772	2.9515300891592773	2.9515300891592773	['Hover-Continuous-Mix', 'Unclassified']	99.89794147923728	0.3639371381306865	2.0604974266307035	5.095383614434054	1.0	False	0.6033477827239005	0.0	0.0
cor	1	2	31	0 days 00:25:23.782216075	0 days 00:25:23.876882750	0.094666675	True	11.0	88.0	0.275	2.0	85.1063829787234	282.71999927029987	135.66	58.77394033883145	58.77394033883145	0.6837947244807465	-2.647104519703265	48.36582886121682	1096.9334515504513	-727.0270732618285	-727.0270894018856	107.13976920004828	232.2349166920709	103.11174444574246	68.34054640377721	['Unclassified', 'Hover-Continuous-Mix']	91.18344020126123	0.33218943033630743	1.8800748699275696	6.292302707921149	2.0	False	0.6601096552602376	0.0	0.0
cor	1	2	32	0 days 00:25:32.591550183	0 days 00:25:32.633550187	0.042000004	False	8.0	16.0	0.0	1.0	34.63203463203463	285.79904977298827	111.97008771975449	74.73506377696702	89.73506377696701	1.6586960222230505	9.34322628897125	95.92277665997807	70.74590725028692	-65.69112746670905	-70.74590725028662	168.76421734092537	293.859364832948	2.971328104512025	2.971328104512025	['Unclassified']	230.92209221374765	0.8412698412698412	1.790041539773944	4.164548458960562	1.0	False	0.3786242580345728	0.0	0.0
cor	1	2	33	0 days 00:25:43.041551102	0 days 00:25:43.097551107	0.056000005000000005	True	7.0	15.0	0.0	0.0	24.350649350649352	284.184675000604	195.84493401070563	0.0	0.0	2.969792230946505	-1.694918017599816	1.4757650445796406	0.0	0.0	0.0	1.4757650445796406	1.4757650445796406	0.0	0.0	['Hover']	10.1195317342604	0.036866359447004615	1.3540541931906491	2.960756110416876	1.0	False	0.19958412940652875	0.0	0.0
cor	1	2	34	0 days 00:25:50.194885065	0 days 00:25:50.233551735	0.03866667	True	8.0	27.0	0.3333333333333333	1.0	64.5933014354067	274.80395089085647	188.26289115397483	5.82499588171191	5.82499588171191	0.6777613188075444	3.3226263956660858	4.349230837132269	0.0	-1.677504877748932	0.0	1.4757650445796409	1.4757650445796409	0.0	0.0	['Unclassified', 'Hover-Continuous-Mix']	93.67224440858143	0.34125636672325976	1.517428363197305	2.43524329244084	0.0	False	0.41545089153585424	0.0	0.0
cor	1	2	35	0 days 00:26:27.319554996	0 days 00:26:27.378221668	0.058666672	True	10.0	47.0	0.5357142857142857	1.5	71.21212121212122	309.4040952469056	188.88547528269774	168.8833997209797	183.8833997209797	1.1559316965951008	5.32561265147109	41.87950157957729	11655.532564694344	-5.820766091346742e-12	4.608106488982836e-12	147.01306045151122	178.8622517001817	609.1709995056409	0.0	['Fragmented', 'Unclassified']	234.54825775185768	0.8544802867383513	2.5436187478412906	3.9616597447175335	1.0	False	0.14958615242020784	0.0	0.0
cor	1	2	36	0 days 00:26:40.478222820	0 days 00:26:40.594889497	0.116666677	True	11.0	112.0	0.5	2.0	87.7742946708464	309.99564850942755	119.25677886112032	99.03603161803088	114.03603161803088	1.6311223626510432	-20.46846341836281	19.065111956585525	280.38780042474843	219.20502594555	-217.03858652958286	80.02076271777393	90.45343767453295	36.9219635719185	25.17647603743164	['Continuous', 'Hover-Continuous-Mix', 'Unclassified']	38.62433340813613	0.1407119021134594	3.0070825955200813	8.397069544259843	2.0	True	0.9732994805688208	0.1	0.8620689655172413	17.706311750019132	297.63234327904564	283.59917258118185	-281.2800612659092	81.37214800667978	[93.47405096]	33.970433482759205	0.0	0.098	11.0	104.0	0.5	94.54545454545456
cor	1	2	37	0 days 00:26:41.111556209	0 days 00:26:41.168889548	0.057333339	True	7.0	20.0	0.6666666666666666	0.0	31.34796238244514	309.2415597979972	119.57549937208445	98.28670335466921	113.28670335466921	0.9017344371551808	-12.035648434616704	0.7977401328351518	0.0	-1.937853002082372	-2.508950901442561e-13	97.48896322183407	112.48896322183407	0.0	0.0	['Hover']	16.386080839815325	0.059695958472376714	1.772993449791724	4.754080343658048	1.0	False	0.16360406622745094	0.0	0.0
cor	1	2	38	0 days 00:26:41.250889555	0 days 00:26:41.316222894	0.065333339	True	9.0	36.0	0.4	1.0	49.586776859504134	308.98040717368457	119.48554725501721	98.02425827699993	113.02425827699993	0.81704988059883	-10.26802599865174	0.5352950551659192	0.0	-1.3053872141654068	-2.2048356406616445e-13	97.48896322183406	112.48896322183406	0.0	0.0	['Hover']	16.635896866170505	0.060606060606060615	1.819952299446444	3.313179585259474	1.0	False	0.18215176550016046	0.0	0.0
cor	1	2	39	0 days 00:26:41.362222898	0 days 00:26:41.403556235	0.041333337000000005	True	8.0	29.0	0.2	1.0	65.9090909090909	308.9076350088774	119.50459576719385	97.95177360879185	112.95177360879185	0.7421785304242897	-9.121175394218282	0.4628103869578356	0.0	-0.2945654893681212	-3.6379788070917137e-13	97.488963221834	112.48896322183406	0.0	0.0	['Hover-Continuous-Mix']	17.856757039413658	0.0650537634408602	1.670458490201968	2.750681415257342	1.0	False	0.3185129872750762	0.0	0.0
cor	1	2	40	0 days 00:26:44.232889817	0 days 00:26:44.277556488	0.044666671000000005	True	9.0	29.0	0.29166666666666663	1.0	59.91735537190082	311.70479987610236	112.35162345037142	100.64362329988028	115.64362329988026	3.0371637974523686	2.5835257303793537	10.632424508946093	253.48354003050287	254.88172757864552	-253.48354003050338	90.0111987909342	105.0111987909342	11.15327576134213	11.15327576134213	['Hover-Continuous-Mix', 'Unclassified']	73.1174499359913	0.26637341153470184	2.5808713863100703	4.1158203381491685	1.0	False	0.725111503574838	0.0	0.0
cor	1	2	41	0 days 00:26:45.231556572	0 days 00:26:45.294223244	0.062666672	True	9.0	39.0	0.42857142857142855	1.0	55.39772727272727	312.47502143512236	108.05369713260859	101.35066343486105	116.35066343486105	2.26442949818558	4.269519899454012	95.85390442690445	139.28100489900237	49.118390161472604	46.427001633000366	142.07974544995776	267.17489294198026	8.913984313536162	2.971328104512054	['Unclassified', 'Hover-Continuous-Mix']	102.28896465242636	0.3726478494623656	1.9683324706849772	4.386736014739475	2.0	False	0.5418691384756228	0.0	0.0
cor	1	2	42	0 days 00:26:45.335556581	0 days 00:26:45.381556585	0.046000004	True	6.0	23.0	0.0	1.0	45.45454545454545	312.84773464174566	108.52847659387804	101.66290603592647	116.66290603592647	3.2212349808091427	4.576000522987702	96.81612505083191	0.0	1.3728470760369091	-9.490379496760992e-13	142.7297234728198	267.8248709648423	0.0	0.0	['Hover-Continuous-Mix', 'Unclassified']	133.20383619771027	0.4852734922861149	2.1176524721424177	3.530933248051225	1.0	False	0.4191992871259547	0.0	0.0
cor	1	2	43	0 days 00:26:55.376890797	0 days 00:26:55.414224134	0.037333337	True	10.0	23.0	0.0	1.0	55.023923444976084	305.5200078004384	190.18607179165366	168.88339972097975	183.88339972097972	3.655658860270981	2.0028153634810733	1.46112952365758	0.0	-5.983517774821897e-15	-3.829451375886013e-13	167.42227019732215	182.42227019732212	0.0	0.0	['Hover-Continuous-Mix']	12.116807734443366	0.04414261460101867	1.9452890989907992	2.717259987110514	2.0	False	0.2748470635823617	0.0	0.0
cor	1	2	44	0 days 00:26:59.536224496	0 days 00:26:59.689557843	0.15333334699999998	True	10.0	175.0	0.44862155388471175	2.0	104.66507177033493	309.1273105699709	187.27725652185276	167.89897804560792	182.89897804560792	0.8743495008493337	-0.3699143730590636	87.13033018978103	2528.192201123197	-1286.661743579152	-52.57935806005289	92.81122217663669	107.35695556426977	299.818186660391	7.992062425130173	['Unclassified', 'Hover-Continuous-Mix', 'Unclassified', 'Hover-Continuous-Mix', 'Unclassified']	152.78051803621858	0.5565930956423317	2.959124511672799	7.177911580929036	3.0	False	0.7668985512310289	0.0	0.0
cor	1	2	45	0 days 00:27:05.622891698	0 days 00:27:05.684891704	0.062000005999999996	True	10.0	61.0	0.5	2.0	89.44281524926687	309.15023826963466	178.86528022507912	159.49559531915077	174.49559531915074	3.1480628998313414	-6.710814357962048	36.284276515345276	706.9981566127398	138.88170409373885	-141.39963132254812	123.21131880380544	138.21131880380545	43.83388570998982	8.766777141997977	['Continuous', 'Fragmented-Continuous-Mix']	104.35087024898623	0.3801595560180367	2.0112317218071367	4.854666678336105	1.0	True	0.9543729527698509	0.03	0.4838709677419355	30.492435531134486	612.3523235894098	630.9819059564793	-633.1561269220747	129.04326804235322	[144.04326804]	17.533554283995937	0.0	0.027999999999999997	9.0	29.0	0.6666666666666666	87.87878787878788
cor	1	2	46	0 days 00:27:10.012892084	0 days 00:27:10.123558761	0.11066667699999999	True	10.0	151.0	0.6294642857142857	3.0	124.79338842975208	303.26566909025416	168.7928371949201	149.7171869298435	164.7171869298435	1.457138659617919	-11.855677252897706	94.50810818041616	3313.656824791332	-1531.9801881734536	-151.460922297906	82.84707794000876	102.95182666612119	376.15449643567496	16.66070145276936	['Fragmented', 'Unclassified', 'Hover-Continuous-Mix', 'Unclassified']	114.68036000969795	0.4177908113391984	3.7909069475235033	10.764516409025926	1.0	False	0.3579352607943481	0.0	0.0
cor	1	2	47	0 days 00:27:19.807559612	0 days 00:27:19.901559621	0.094000009	True	10.0	90.0	0.2727272727272727	2.0	87.04061895551256	289.4268983384516	117.10246040175144	78.43787038609442	93.43787038609442	3.2042030407071618	-9.895198205632088	13.637436115650607	890.8800881242764	88.89566588668427	-91.59333557704565	66.71730448412671	69.27049597348841	135.26344230984742	8.60977354424223	['Unclassified', 'Hover-Continuous-Mix', 'Unclassified']	112.15814338805274	0.4086021505376344	3.2737200209534474	7.404126144000431	2.0	False	0.6005859166860331	0.0	0.0
cor	1	2	48	0 days 00:27:20.490226339	0 days 00:27:20.558226345	0.068000006	True	9.0	39.0	0.0625	1.0	52.13903743315508	287.1459268777437	114.52067606186442	76.11924124266021	91.1192412426602	1.6303633039702308	-6.7198255340212185	29.794513050603147	0.0	0.23580311584826694	-2.1399875335833608e-13	101.25177626585727	226.34692375787984	0.0	0.0	['Unclassified', 'Hover-Continuous-Mix']	108.33851621384659	0.3946869070208729	1.678528007606623	4.786105363173848	1.0	False	0.4249301793423727	0.0	0.0
cor	1	2	49	0 days 00:27:21.398893086	0 days 00:27:21.484893093	0.08600000699999999	True	10.0	75.0	0.25	2.0	79.28118393234672	287.2129182060543	117.01290710513344	76.222814118716	91.22281411871599	0.21903199711855634	-3.0152915114765397	6.794173873218751	304.6508589502908	-134.20780949491726	-168.42793890987048	75.88273646959819	139.88490495388876	32.012084814818174	14.484802746248903	['Continuous', 'Hover-Continuous-Mix', 'Unclassified']	40.154537259492564	0.14628657164291073	2.6441570959180085	4.6683229992053725	2.0	True	0.8654987627351222	0.055999999999999994	0.6511627906976745	7.707752478910307	365.8310157056842	-206.14233872661788	-258.65719189730163	78.42784074863008	[176.71688521]	26.10902463649955	0.0	0.054000000000000006	9.0	44.0	0.19642857142857145	71.42857142857143
cor	1	2	50	0 days 00:27:24.030226650	0 days 00:27:24.148226661	0.118000011	True	10.0	59.0	0.0	1.0	45.45454545454545	286.79623585707594	113.11043600998495	75.74888399208487	90.74888399208487	1.0996078945720746	9.11727845721799	4.7973182042556735	145.94773324786203	26.422014405600468	49.25517750106211	75.80239340541483	135.08322361362852	11.696483805881215	5.812110945125326	['Hover-Continuous-Mix', 'Continuous']	29.715404626451072	0.1082558775287042	1.2770429922354702	2.513384851977882	1.0	True	0.9179148497656171	0.078	0.6610169491525424	5.541259362989996	220.7536971315844	38.297564359945504	74.51424288622226	77.59208890336994	[167.27334486]	11.696483805881215	0.04	0.11599999999999999	10.0	38.0	0.0	44.289044289044284
cor	1	2	51	0 days 00:27:34.990894281	0 days 00:27:35.067560954	0.076666673	True	9.0	32.0	0.29166666666666663	1.0	38.277511961722496	249.9499819871539	194.77159175054862	176.8999966747125	301.99514416673486	3.328333725264357	15.506912635748456	1.485664052260165	0.0	-1.4958794437054742e-15	-1.914725687943007e-13	175.41433262245232	300.50948011447485	0.0	0.0	['Hover']	2.9515300891592813	0.01075268817204301	1.2875010736836578	3.7504577470387135	1.0	False	0.025047602592822245	0.0	0.0
cor	1	2	52	0 days 00:27:57.299562910	0 days 00:27:57.366229582	0.06666667200000001	True	11.0	59.0	0.45	1.5	78.87700534759358	312.41822372838595	108.65121554285149	101.30264409480507	116.30264409480507	3.606508788261897	4.074204945991971	1.025361932635533	0.0	1.5267520499798597	-1.0699937667916804e-13	100.27728216216957	115.27728216216957	0.0	0.0	['Hover-Continuous-Mix']	27.17143876196633	0.09898798228969008	2.613278142160908	7.2428004421285355	1.0	False	0.31799956507328864	0.0	0.0
cor	1	2	53	0 days 00:28:30.095565794	0 days 00:28:30.162232466	0.06666667200000001	True	11.0	103.0	0.7136363636363636	3.0	137.70053475935828	280.463054345229	196.5322011984672	0.0	0.0	0.02627608559312365	-7.372870414359483	124.7356625552027	4671.73294140712	113.11619101969879	113.11619101969879	124.7356625552027	243.35462490063568	206.23576746796203	1.166163186876986	['Fragmented', 'Fragmented-Continuous-Mix', 'Unclassified', 'Hover-Continuous-Mix', 'Unclassified', 'Fragmented-Continuous-Mix', 'Unclassified']	132.55842488665368	0.4829222011385199	5.137752351767565	7.684805054698303	1.0	False	0.6845625942420198	0.0	0.0
cor	1	2	54	0 days 00:28:32.972899380	0 days 00:28:33.034232719	0.061333339	True	10.0	50.0	0.45	1.0	73.31378299120234	280.44000000000005	196.08	0.0	0.0	0.041660390828815605	-0.042530155018742924	28.972122229078263	2615.0394713105147	-2615.0394713102514	-2615.0394713102514	28.972122229078263	41.07810424443532	162.13244722123557	162.13244722123557	['Unclassified', 'Hover-Continuous-Mix']	106.15987256169676	0.3867499132847729	2.213893601875504	5.241580991660956	2.0	False	0.3463114389011704	0.0	0.0
cor	1	2	55	0 days 00:28:33.264232739	0 days 00:28:33.300899409	0.036666670000000005	True	8.0	23.0	0.29166666666666663	1.0	58.080808080808076	280.44000000000005	196.08	0.0	0.0	0.18095109036256904	-0.01988148731890185	172.44300451794032	0.0	4.042198674546348e-13	4.042198674546348e-13	172.44300451794032	297.53815200996286	0.0	0.0	['Hover-Continuous-Mix']	50.33998540954998	0.18339307048984466	1.6740106253668765	3.129543719386594	1.0	False	0.3267090522289208	0.0	0.0
cor	1	2	56	0 days 00:28:33.514899428	0 days 00:28:33.548232764	0.033333336000000005	True	9.0	36.0	0.0	2.0	96.25668449197859	280.43999986468714	196.08	0.0	0.0	0.42618956658051	-0.008898067973040309	110.04511432318716	0.0	-2.1399875335833608e-13	-2.1399875335833608e-13	110.04511432318716	235.14026181520973	0.0	0.0	['Hover-Continuous-Mix', 'Unclassified']	47.57172026056725	0.1733080328905756	2.0092399031068697	3.5838941413335483	1.0	False	0.3615819199448687	0.0	0.0
cor	1	2	57	0 days 00:28:33.866232792	0 days 00:28:33.934232798	0.068000006	True	10.0	77.0	0.625	2.0	102.94117647058823	280.38819552667445	196.07999999999996	0.0	0.0	0.818518998671785	-0.001947528694278648	69.25041707114724	1993.6570061590921	-1733.2278806447996	-1733.2278806447996	69.25041707114724	83.96749324667931	135.568676418802	117.85949588384636	['Unclassified', 'Hover-Continuous-Mix', 'Unclassified']	102.86950457805145	0.3747628083491461	3.7980457124871263	9.862436057500172	1.0	False	0.6814749287966716	0.0	0.0
cor	1	2	58	0 days 00:28:33.959566134	0 days 00:28:34.010232805	0.050666670999999996	True	11.0	73.0	0.75	3.0	127.62237762237764	280.3119403391501	196.08	0.0	0.0	0.8784080079788027	-0.0012455185376513207	81.85941970252183	8743.316384753905	-2032.6348317472848	-2032.6348317472848	81.85941970252183	130.3538938343758	750.7793146355345	105.69701125085932	['Fragmented']	211.94256447924542	0.7721257237386268	8.01712018621535	18.699024279786972	1.0	False	0.12113395409768166	0.0	0.0
cor	1	2	59	0 days 00:28:34.283566162	0 days 00:28:34.324232832	0.04066667	True	6.0	14.0	0.0	0.0	30.303030303030305	279.4035599626798	196.07999999999996	0.0	0.0	0.8528055821235001	-5.4397062741321694e-08	175.41433262245224	0.0	-3.4647417210397264e-13	-3.4647417210397264e-13	175.41433262245224	300.50948011447497	0.0	0.0	['Hover']	5.903060178318565	0.02150537634408602	1.9479198484274225	4.637098286299222	1.0	False	0.07405922072647451	0.0	0.0
cor	1	2	60	0 days 00:28:35.424232929	0 days 00:28:35.512899604	0.088666675	True	11.0	107.0	0.4444444444444444	2.0	110.53719008264463	279.25292550958125	196.08	0.0	0.0	0.07084354612949384	0.0	135.73533819452544	3237.2414716484413	-540.2414735476458	-540.2414735476458	135.73533819452544	185.76561239653267	133.26703920100198	47.54124967219282	['Unclassified', 'Fragmented-Continuous-Mix', 'Unclassified', 'Hover-Continuous-Mix', 'Unclassified']	135.09958180833627	0.4921798631476051	2.0761180544486653	5.73381297942276	2.0	False	0.4745421447617447	0.0	0.0
cor	1	2	61	0 days 00:28:36.030899649	0 days 00:28:36.122899657	0.092000008	True	8.0	41.0	0.0	1.0	40.51383399209487	279.2999999999999	196.08	0.0	0.0	0.005042738642595461	0.0	175.41433262245232	0.0	-1.5817299161268314e-13	-1.5817299161268314e-13	175.41433262245232	300.50948011447485	0.0	0.0	['Hover-Continuous-Mix', 'Unclassified', 'Hover-Continuous-Mix', 'Unclassified']	60.37803943258446	0.21996259934548854	1.3906652949726053	2.7621293772182245	1.0	False	0.3181224312136156	0.0	0.0
cor	1	2	62	0 days 00:28:36.813566385	0 days 00:28:36.916899727	0.103333342	True	10.0	80.0	0.2727272727272727	1.0	69.93006993006993	279.29999999999984	196.08	0.0	0.0	0.10205070394183023	0.0	146.44388360345982	857.1138763015532	-1.0494169635841479e-12	-1.0494169635841479e-12	146.44388360345982	271.5390310954824	89.13984313536156	0.0	['Unclassified', 'Hover-Continuous-Mix', 'Unclassified', 'Fragmented-Continuous-Mix', 'Unclassified']	164.71808305269684	0.6000827129859387	1.6014134720726785	5.191080662419805	1.0	False	0.7104772935418041	0.0	0.0
cor	1	2	63	0 days 00:28:39.087566585	0 days 00:28:39.130899922	0.043333337	True	3.0	6.0	0.25	0.0	12.396694214876034	280.44000000000005	194.94	0.0	0.0	0.04100874405824932	0.0	175.41433262245224	0.0	-3.3072534609924664e-13	-3.3072534609924664e-13	175.41433262245224	300.50948011447497	0.0	0.0	['Hover']	5.903060178318565	0.021505376344086016	2.6655182872233376	5.133023683045229	1.0	False	0.07983395174120031	0.0	0.0
cor	1	2	64	0 days 00:28:39.760899977	0 days 00:28:39.809566648	0.048666670999999995	True	9.0	49.0	0.325	2.0	92.8030303030303	280.44	194.94	0.0	0.0	0.0003664886791781744	0.0	51.65177656028743	0.0	-7.579122514774403e-14	-7.579122514774403e-14	51.65177656028743	51.65177656028741	0.0	0.0	['Unclassified', 'Hover-Continuous-Mix']	70.71374171944116	0.2576164874551971	4.219955605871367	7.349486262469482	1.0	False	0.4381155668715485	0.0	0.0
cor	1	4	1	0 days 01:23:15.537566626	0 days 01:23:15.694899947	0.157333321	True	11.0	255.0	0.5714285714285714	3.0	148.6013986013986	280.44284015983294	196.07999999999996	0.0	0.0	0.05959658334820354		89.0325115019118	1019.6994703401563	1019.6994703401547	1019.6994703401547	89.0325115019118	100.18635765575796	159.0731173730644	159.0731173730644	['Unclassified', 'Hover-Continuous-Mix', 'Unclassified', 'Hover-Continuous-Mix']	129.33587710678162	0.4564102564102565	3.930285535860123	10.768968740903436	1.0	False	0.6546762410512352	0.0	0.0
cor	1	4	2	0 days 01:23:17.552899810	0 days 01:23:17.678899801	0.125999991	True	10.0	133.0	0.5147058823529411	2.0	95.95959595959594	280.32949558220145	196.0793569927976	0.0	0.0	0.529774342123097		56.40603918947436	1046.6820158728592	954.9854345534084	954.9854345534084	56.40603918947436	114.61714428115292	131.88193399997374	120.32816475372955	['Hover-Continuous-Mix', 'Unclassified', 'Fragmented-Continuous-Mix', 'Unclassified', 'Hover-Continuous-Mix', 'Continuous']	85.88884159646658	0.30309106098579786	2.341365807536668	8.543868484774293	1.0	True	0.8543625390634443	0.032	0.25396825396825395	114.59851350089569	431.1465922959146	451.31911118141306	451.31911118141306	114.59851350089569	[241.05712111]	14.442211557805251	0.094	0.124	10.0	51.0	0.6666666666666666	144.88636363636363
cor	1	4	3	0 days 01:23:20.866232900	0 days 01:23:20.960899559	0.094666659	True	10.0	52.0	0.2333333333333333	1.0	50.290135396518366	280.4159320306065	197.21999152809002	0.0	0.0	0.6418452812094345		1.4914545260687406	0.0	0.0	0.0	1.4914545260687406	1.4914545260687406	0.0	0.0	['Hover']	2.9829090521374817	0.01052631578947368	1.2909057342397747	3.6263257573712018	1.0	False	0.028091603537631397	0.0	0.0
cor	1	4	4	0 days 01:23:22.500899446	0 days 01:23:22.563566108	0.062666662	True	10.0	35.0	0.5	1.0	49.71590909090909	280.30998501453183	196.98183115018534	0.0	0.0	0.6288748401938821	0.0	1.491454526068741	0.0	0.0	0.0	1.491454526068741	1.491454526068741	0.0	0.0	['Hover']	2.9829090521374817	0.010526315789473684	3.8320728317884463	6.685932487707469	1.0	False	0.044814618208203136	0.0	0.0
cor	1	4	5	0 days 01:23:24.236232652	0 days 01:23:24.288899314	0.052666662	True	8.0	40.0	0.5	1.5	69.93006993006993	279.6172378395821	196.48525443451302	0.0	0.0	0.34920780555836944	0.0	1.491454526068741	0.0	0.0	0.0	1.491454526068741	1.491454526068741	0.0	0.0	['Hover']	2.982909052137482	0.01052631578947368	2.079375234126327	4.068411124352595	1.0	False	0.041496453658569285	0.0	0.0
cor	1	4	6	0 days 01:23:27.262232429	0 days 01:23:27.318232424	0.055999995	True	10.0	33.0	0.0	1.0	53.57142857142857	280.853766077511	196.46040347671098	0.0	0.0	0.4418692850606161	0.0	1.4914545260687413	0.0	0.0	0.0	1.4914545260687413	1.4914545260687413	0.0	0.0	['Hover']	8.948727156412446	0.03157894736842105	2.642567705087707	4.7866242480024415	1.0	False	0.11649112100092936	0.0	0.0
cor	1	4	7	0 days 01:23:27.609565736	0 days 01:23:27.725565728	0.115999992	True	11.0	137.0	0.6875	1.0	107.36677115987463	280.53741503683364	196.7857889308313	0.0	0.0	0.2732103212525713	0.0	58.8189889180823	1456.0437498443155	3.136188626803201e-13	3.136188626803201e-13	58.8189889180823	81.80394527181701	177.41938976253684	0.0	['Unclassified', 'Fragmented-Continuous-Mix', 'Unclassified', 'Continuous', 'Hover-Continuous-Mix', 'Unclassified']	122.04212380555596	0.4306715063520872	3.201672936844868	9.977519157468162	2.0	True	0.8612441339671941	0.04	0.3448275862068966	66.21398305149361	499.24719415237706	483.0732444827134	483.0732444827134	66.21398305149361	[78.85984381]	20.814384305377292	0.022000000000000002	0.06	10.0	72.0	0.8571428571428571	163.63636363636363
cor	1	4	8	0 days 01:23:28.218899025	0 days 01:23:28.257565689	0.038666663999999996	True	8.0	28.0	0.5	1.5	63.63636363636363	280.1630172689075	196.07036260763002	0.0	0.0	0.4136184202402585	0.0	1.4914545260687408	0.0	0.0	0.0	1.4914545260687408	1.4914545260687408	0.0	0.0	['Hover']	2.9829090521374813	0.010526315789473686	2.6301662161608608	5.1300249131390165	1.0	False	0.03693320212996035	0.0	0.0
cor	1	4	9	0 days 01:23:29.782232243	0 days 01:23:29.875565569	0.093333326	True	11.0	73.0	0.3125	1.0	70.59961315280464	280.44000000001233	196.07987563836915	0.0	0.0	0.3607716202590382	0.0	22.879547091394947	444.26305031834846	317.330750227392	317.330750227392	22.879547091394947	22.87954709139494	41.76072672992474	29.829090521374827	['Hover-Continuous-Mix', 'Continuous', 'Hover-Continuous-Mix', 'Unclassified']	60.73710559352278	0.2143337066069429	2.563718594808277	7.748001713116977	1.0	True	0.9420576523603618	0.066	0.7021276595744681	22.462209074429218	564.9400573780152	519.7493045391071	519.7493045391071	22.462209074429218	[22.46220907]	35.79490862564978	0.008	0.07200000000000001	9.0	61.0	0.25	84.0220385674931
cor	1	4	10	0 days 01:23:30.536232187	0 days 01:23:30.592232183	0.055999995999999996	True	10.0	33.0	0.0	1.0	53.57142857142857	280.44179764555855	196.99392830670902	0.0	0.0	0.3573196392444453	0.0	1.4914545260687413	0.0	0.0	0.0	1.4914545260687413	1.4914545260687413	0.0	0.0	['Hover']	5.3266233073883615	0.01879699248120301	2.3845826539841948	6.077308622356983	1.0	False	0.05824472113830478	0.0	0.0
cor	1	4	11	0 days 01:23:32.771565356	0 days 01:23:32.818232019	0.046666663	True	8.0	25.0	0.5	1.0	49.40711462450593	280.18823898309	197.2700094333401	0.0	0.0	0.4983551404066152	0.0	1.4914545260687408	0.0	-2.4714529939481745e-15	-2.4714529939481745e-15	1.4914545260687408	1.4914545260687408	0.0	0.0	['Hover']	5.965818104274963	0.021052631578947368	2.003065694284685	4.036520965650373	1.0	False	0.07706693128799316	0.0	0.0
cor	1	4	12	0 days 01:23:33.779565282	0 days 01:23:33.935565270	0.155999988	True	11.0	334.0	0.7352941176470589	4.0	194.6386946386946	280.444801802981	196.31357176757538	0.0	0.0	0.2463818834055224	0.0	77.62603823038934	521.6230049460141	521.6230049460139	521.6230049460139	77.62603823038934	86.85680746115857	81.37318877157809	81.37318877157809	['Continuous', 'Hover-Continuous-Mix', 'Unclassified']	43.060969137266724	0.15195681511470985	7.566589239504214	17.255733457929725	1.0	True	0.9774007159077116	0.09	0.5769230769230769	59.367849026410475	865.2186323531805	872.1565069189604	872.1565069189604	59.367849026410475	[64.36784903]	78.49408562270642	0.0	0.08800000000000001	11.0	224.0	0.8	226.26262626262627
cor	1	4	13	0 days 01:23:34.436898567	0 days 01:23:34.484898563	0.047999995999999996	False	7.0	29.0	0.1	1.0	54.92424242424242	280.4399837481108	196.35403787028633	0.0	0.0	0.7860323140190236	0.0	1.4914545260687408	0.0	0.0	0.0	1.4914545260687408	1.4914545260687408	0.0	0.0	['Unclassified']	220.98384561251845	0.7798245614035088	1.5160723073149114	3.2264016668985267	1.0	False	0.2572547541222251	0.0	0.0
cor	1	4	14	0 days 01:23:34.824231872	0 days 01:23:34.874898535	0.050666663	True	10.0	35.0	0.25	1.0	63.63636363636363	280.4397774088147	197.23916549881446	0.0	0.0	0.7925767576153917	0.0	1.491454526068741	0.0	0.0	0.0	1.491454526068741	1.491454526068741	0.0	0.0	['Hover']	5.965818104274964	0.021052631578947368	2.540421285900934	4.8775086489872015	1.0	False	0.04518980763139456	0.0	0.0
cor	1	4	15	0 days 01:23:35.242231841	0 days 01:23:35.307565169	0.06533332800000001	True	8.0	32.0	0.29166666666666663	1.0	44.0771349862259	280.4399999994911	197.22000797019533	0.0	0.0	0.30714433340587816	0.0	1.491454526068741	0.0	0.0	0.0	1.491454526068741	1.491454526068741	0.0	0.0	['Hover']	10.485377274180236	0.037001594896331744	2.2842572477594034	5.696724337439119	1.0	False	0.1128351858921354	0.0	0.0
cor	1	4	16	0 days 01:23:35.557565151	0 days 01:23:35.610898480	0.053333329000000006	True	7.0	25.0	0.0	0.5	43.70629370629371	280.43999999999994	197.22000000013475	0.0	0.0	0.02110438358471152	0.0	1.491454526068741	0.0	0.0	0.0	1.491454526068741	1.491454526068741	0.0	0.0	['Hover']	2.982909052137482	0.01052631578947368	2.628523850002785	7.181665501364633	1.0	False	0.04428756348636435	0.0	0.0
cor	1	4	17	0 days 01:23:37.153565033	0 days 01:23:37.234898361	0.08133332800000001	True	11.0	113.0	0.641025641025641	3.0	128.4090909090909	280.439217878007	197.25726135647758	0.0	0.0	0.14970554723153262	0.0	106.22758591580288	1757.5529537082373	1684.6297038941855	1684.6297038941855	106.22758591580288	210.55593719649232	215.12483491158338	134.77037631153482	['Unclassified', 'Fragmented', 'Fragmented-Continuous-Mix', 'Unclassified', 'Hover-Continuous-Mix', 'Unclassified']	134.30548007249013	0.4739473684210527	4.946827124039217	13.652816780814641	1.0	False	0.5665862603165951	0.0	0.0
cor	1	4	18	0 days 01:23:40.779564766	0 days 01:23:40.890231425	0.110666659	True	10.0	115.0	0.5	2.0	95.04132231404958	280.4399997794122	196.08000435985855	0.0	0.0	0.5354920838276462	0.21951918065267967	41.57090524478872	921.9900706606767	-216.93884015545206	-216.93884015545206	41.57090524478872	41.57090524478871	101.4189077726744	23.863272417099857	['Continuous', 'Hover-Continuous-Mix', 'Unclassified']	53.746597648513536	0.18966507177033493	8.403674640171714	16.313137328793403	1.0	True	0.9859334234380718	0.092	0.8363636363636363	43.96548559454812	414.9398377987992	421.49801823681776	421.49801823681776	43.96548559454812	[43.96548559]	38.777817677787276	0.0	0.09	10.0	111.0	0.5454545454545454	109.68379446640316
cor	1	4	19	0 days 01:23:43.791564544	0 days 01:23:43.850231207	0.058666663	True	9.0	31.0	0.1	1.0	48.589341692789965	284.33347491944613	193.2609765283388	0.5077039466438631	0.5077039466438631	3.2151439572670064	4.414624734974558	15.898295840112288	231.43259887273567	121.57420957376446	128.57366604040843	16.40599978675615	16.40599978675615	11.931636208549941	5.965818104274964	['Hover-Continuous-Mix', 'Continuous', 'Hover-Continuous-Mix']	25.097579611087774	0.08856624319419236	1.87444139543684	3.514223093076728	1.0	True	0.8131878252964867	0.034	0.5862068965517241	15.928735780110399	176.5303113626908	167.5947582682241	175.46523836102833	16.40599978675615	[16.40599979]	5.965818104274975	0.008	0.04	8.0	18.0	0.0	48.128342245989295
cor	1	4	20	0 days 01:23:43.936231200	0 days 01:23:43.978897864	0.04266666400000001	True	9.0	19.0	0.0	1.0	41.12554112554113	286.3450485423568	192.47046494672944	1.3844906041666891	1.3844906041666891	1.968407136301699	4.871486366188631	15.021509182589464	142.04328819702292	135.14551907383014	142.04328819702283	16.405999786756162	16.405999786756162	5.965818104274987	5.9658181042749625	['Hover-Continuous-Mix']	23.29509926431175	0.08220551378446117	1.7940262738354231	3.7135771896082	1.0	False	0.7881540689207315	0.0	0.0
cor	1	4	21	0 days 01:23:52.766897217	0 days 01:23:52.870230542	0.103333325	True	10.0	87.0	0.375	1.0	76.04895104895104	279.4767501955584	124.97954715920014	68.51513157801404	68.51513157801404	0.4724681925838526	14.870058828638735	10.608151022288864	54.82597948038793	0.16040923282064035	3.4543308384644874e-13	79.1232826003029	205.5818902132598	5.701901865960579	1.4210854715202004e-14	['Unclassified', 'Hover-Continuous-Mix']	63.558908264775575	0.22429149797570844	2.0092180942410294	6.2292563640197995	2.0	False	0.42089528520297853	0.0	0.0
cor	1	4	22	0 days 01:23:53.966897128	0 days 01:23:54.052230455	0.08533332699999999	True	9.0	76.0	0.4444444444444444	2.0	80.33826638477801	281.0868655131271	126.54000673145755	67.02578170431775	67.02578170431775	0.12484225596380087	4.937892184201216	15.042107273190696	258.91273275632943	159.68289079895206	159.46095602453553	82.06788897750845	156.68528374722956	19.498792152796053	13.713642218110067	['Unclassified', 'Hover-Continuous-Mix', 'Continuous']	59.311331152966225	0.2093023255813954	1.8807371609069896	4.327104705770152	1.0	True	0.9182568826320068	0.05	0.5813953488372093	17.363768539918244	441.607061566436	274.5141837545229	274.2728443622013	84.38537909522583	[121.67710062]	19.498792152795968	0.036000000000000004	0.084	9.0	49.0	0.45	89.0909090909091
cor	1	4	23	0 days 01:23:56.009563644	0 days 01:23:56.069563640	0.059999996000000014	True	7.0	29.0	0.0	1.0	43.93939393939394	282.2707288923488	126.68562044678329	66.93151488875658	66.93151488875658	3.054485803517012	3.9083944038750933	5.78187931993816	0.0	-0.7546193311130887	-1.2126596023639046e-13	61.149635568818425	61.149635568818425	0.0	0.0	['Hover-Continuous-Mix']	28.834787503995656	0.10175438596491224	1.2082506246657267	2.864700409640592	1.0	False	0.6678692194738278	0.0	0.0
cor	1	4	24	0 days 01:23:56.300896956	0 days 01:23:56.358896952	0.05799999600000001	True	11.0	56.0	0.3666666666666667	1.0	87.7742946708464	283.48290097448194	126.1146115359069	67.5544244738371	67.5544244738371	2.1715324375581284	4.551324751790373	6.404788905018696	0.0	4.585205389669367	-1.2544754507212806e-13	61.149635568818425	61.149635568818425	0.0	0.0	['Hover']	15.943134589010679	0.05626134301270416	1.6388325105300778	3.271870115656898	1.0	False	0.1383706255557667	0.0	0.0
cor	1	4	25	0 days 01:23:56.431563613	0 days 01:23:56.481563610	0.049999997	True	9.0	26.0	0.0	1.0	47.27272727272727	283.4982674652887	125.62057814159589	68.0486601491358	68.0486601491358	1.9949965387219144	4.862444583491764	6.899024580317389	0.0	2.78089013994402	-1.4551915228366852e-13	61.149635568818425	61.149635568818425	0.0	0.0	['Hover']	21.596261537475367	0.07621052631578946	1.6495009587801002	3.8319044736601002	1.0	False	0.18602354571156826	0.0	0.0
cor	1	4	26	0 days 01:23:56.575563603	0 days 01:23:56.645563598	0.06999999500000001	True	11.0	52.0	0.125	1.0	67.53246753246752	283.3787358124704	125.39843908173604	68.26542067692398	68.26542067692398	2.284665724358817	5.2536067227346654	7.115785108105575	0.0	0.3823989284256723	-1.0394225163119181e-13	61.1496355688184	61.1496355688184	0.0	0.0	['Hover']	18.408810150334173	0.06496240601503757	1.2409508894224153	2.6672363742543657	1.0	False	0.19537499330258834	0.0	0.0
cor	1	4	27	0 days 01:24:00.959563280	0 days 01:24:01.040229940	0.08066666	True	10.0	56.0	0.0	1.0	63.63636363636363	288.0929266168747	109.13544851875528	78.64791486413425	93.64791486413424	3.5826059999566624	2.6765496527014316	4.025767405412137	35.116586232639605	-32.105670946160075	-0.5203004295331993	75.97634915188034	143.91918776803487	0.04162403436264128	0.04162403436264128	['Unclassified', 'Hover-Continuous-Mix']	64.8036991576868	0.22868421052631574	1.80840637494912	3.746971040348948	2.0	False	0.6348262214829208	0.0	0.0
cor	1	4	28	0 days 01:24:02.088229863	0 days 01:24:02.162896524	0.07466666100000001	True	10.0	67.0	0.6666666666666666	2.0	82.30958230958231	290.84004525403844	109.46450514366943	81.40692859189322	96.40692859189322	2.896181252983059	-0.14239039740043366	59.5994448458611	443.4053996420581	437.06383619396377	-443.4053996420584	21.807483746032137	21.807483746032144	32.8119995735123	32.8119995735123	['Hover-Continuous-Mix', 'Unclassified', 'Hover-Continuous-Mix']	92.06708479840549	0.32489331436699864	1.7569770921373813	5.78769638157253	1.0	False	0.7739369160423657	0.0	0.0
cor	1	4	29	0 days 01:24:23.734894935	0 days 01:24:23.832228262	0.097333327	True	11.0	71.0	0.14545454545454545	1.0	65.86270871985157	282.12423657008776	173.3336271005558	20.320835333859772	20.320835333859772	3.03329814029204	11.033444182730275	19.70493409022991	410.9109408556735	44.029396971077965	45.656771206185596	40.02576942408968	40.02576942408968	41.76072672992481	5.965818104274965	['Continuous', 'Fragmented-Continuous-Mix', 'Unclassified']	51.68346500540248	0.1823845327604726	1.437925061205476	3.322181534115716	2.0	True	0.9396743663438882	0.08800000000000001	0.8979591836734694	19.95877153936692	367.50191668050513	134.07275022367375	135.58677509715787	40.269272203856005	[40.2692722]	35.79490862564985	0.0	0.086	10.0	61.0	0.15000000000000002	63.01652892561983
cor	1	4	30	0 days 01:24:27.067561357	0 days 01:24:27.115561353	0.047999995999999996	True	11.0	55.0	0.6666666666666666	2.0	104.16666666666669	280.39946152194096	168.72000000000003	24.855535021185585	24.855535021185585	0.7193988206135294	0.05250220858354915	18.14398965387625	776.7992323274692	-279.6339749603696	279.6477236378888	6.711545367309335	6.711545367309338	53.69236293847468	11.931636208549929	['Hover-Continuous-Mix', 'Unclassified', 'Hover-Continuous-Mix']	100.42460475529522	0.3543859649122807	2.797349811901105	5.3919628802709765	1.0	False	0.7713552722818002	0.0	0.0
cor	1	4	31	0 days 01:24:27.166894683	0 days 01:24:27.240228011	0.073333328	True	10.0	135.0	0.7928571428571429	3.0	165.8476658476659	280.48225319213395	168.72	24.859116356039358	24.859116356039358	0.7975100045089544	-0.011961545616343671	33.4154536444601	1551.9188987472035	208.31007289800428	-423.25060874923554	55.7481516095424	55.7481516095424	116.33345303336188	32.8119995735123	['Continuous', 'Hover-Continuous-Mix', 'Unclassified']	86.2625050212731	0.3044096728307254	5.200330825426047	12.23165717599315	1.0	True	0.8560861742659142	0.04	0.5405405405405406	25.105421534206	816.2441878869772	820.2572506484382	820.2999893378078	49.96372662330283	[49.96372662]	29.829090521374827	0.0	0.038	10.0	68.0	0.7083333333333333	154.54545454545453
cor	1	4	32	0 days 01:24:28.761561232	0 days 01:24:28.822227894	0.060666662	True	11.0	60.0	0.4523809523809523	2.0	90.9090909090909	280.93635769791507	168.72	24.87875964007987	24.87875964007987	0.679996979954024	-0.1721657344310401	23.387305114011134	0.0	-0.08760565802090099	0.0	1.4914545260687413	1.4914545260687413	0.0	0.0	['Hover-Continuous-Mix', 'Unclassified', 'Hover-Continuous-Mix', 'Continuous']	59.45932043927382	0.2098245614035088	2.852611901504908	6.391207610029312	1.0	True	0.8113103704287181	0.006	0.1	23.385133006691603	0.0	-0.05112524356067636	0.0	1.4914545260687408	[1.49145453]	0.0	0.054000000000000006	0.057999999999999996	0.0	0.0		0.0
cor	1	4	33	0 days 01:24:30.228894457	0 days 01:24:30.328227783	0.099333326	False	11.0	101.0	0.5333333333333333	2.0	91.8181818181818	281.04629959242317	168.71999999999997	24.88351541729477	24.88351541729477	0.3699065700623474	-1.5994048633567104	111.76069957747978	1590.7311737306436	1063.0910544128255	1530.9211050606214	128.22318651444	140.52318651443997	159.07311737306523	153.09211050606189	['Unclassified']	195.32088473396232	0.6892631578947369	4.693769215510635	11.00993129469944	1.0	False	0.3938843052749823	0.0	0.0
cor	1	4	34	0 days 01:24:31.638227687	0 days 01:24:31.692227683	0.053999995999999995	True	10.0	36.0	0.08333333333333333	1.0	60.60606060606061	279.5801503206372	166.96542918577725	26.573022405291947	26.573022405291947	1.527713614117583	-5.756739433770383	7.790720667365129	552.3905652106449	45.0096893568334	-110.4781130421287	33.751063534370395	33.751063534370395	29.829090521374837	5.9658181042749625	['Hover-Continuous-Mix', 'Continuous', 'Hover-Continuous-Mix']	35.57395239956553	0.12553606237816764	1.5963753802470269	3.45348088003034	1.0	True	0.8039907180227072	0.018000000000000002	0.3333333333333333	9.698306617323176	461.57423399801	499.5714916624143	497.1515086895804	36.292060134339366	[36.29206013]	8.948727156412449	0.01	0.026000000000000002	7.0	10.0	0.0	50.5050505050505
cor	1	4	35	0 days 01:24:43.200226835	0 days 01:24:43.308226827	0.10799999199999999	True	11.0	103.0	0.3	2.0	86.70033670033669	282.7448037148132	150.3228390553061	43.33692857540542	43.33692857540542	0.4394552581009944	17.577900198975787	37.25652570243325	551.4481124742903	552.6028092891066	551.44811247423	80.59345427783866	150.8482362850369	58.06494162114836	58.06494162114814	['Hover-Continuous-Mix', 'Unclassified', 'Fragmented-Continuous-Mix', 'Continuous', 'Hover-Continuous-Mix', 'Unclassified']	92.91209306843041	0.3278752436647173	1.4442123337960768	2.8256918577811128	1.0	True	0.8895440392919851	0.055999999999999994	0.5185185185185185	49.59190505398503	607.83763623323	614.3154916919373	613.3548422090653	92.902945971059	[219.36155358]	37.279044996762366	0.048	0.102	11.0	68.0	0.35416666666666663	110.38961038961037
cor	1	4	36	0 days 01:24:43.840226788	0 days 01:24:43.890226784	0.049999996000000005	True	10.0	35.0	0.0	1.0	63.63636363636363	282.6999826139517	150.33772943421866	43.32011329954526	43.32011329954526	1.2703727767486206	17.75789273591684	22.61872447771114	507.09453886337195	506.39863618026817	-507.0945388633722	20.70138882183413	20.701388821834122	23.863272417099857	23.863272417099857	['Continuous']	26.368916020895337	0.09305263157894736	2.6485934547076018	4.944628463699413	2.0	True	0.959865591889025	0.05	1.0	22.61872447771114	507.09453886337195	506.39863618026817	-507.0945388633722	20.70138882183413	[20.70138882]	23.863272417099857	0.0	0.048	10.0	35.0	0.0	63.63636363636363
cor	1	4	37	0 days 01:24:48.968893077	0 days 01:24:49.015559740	0.046666663	True	10.0	36.0	0.0	1.0	68.18181818181817	281.9332419685389	129.97926014647553	63.62635940006277	63.62635940006277	0.9283353943275184	1.7826265936848884	14.781223671311489	124.28787717239507	-124.7726307216866	124.28787717239523	48.84513572875128	48.84513572875128	5.965818104274972	5.965818104274972	['Hover-Continuous-Mix']	20.383211856272787	0.07192982456140351	1.8449617276575756	3.936789877072312	1.0	False	0.7386600420745759	0.0	0.0
cor	1	4	38	0 days 01:24:57.154225807	0 days 01:24:57.233559134	0.07933332700000001	True	10.0	60.0	0.16666666666666666	1.0	68.18181818181817	287.27999999999986	127.67999999999998	66.1547530876048	66.1547530876048	0.016547726661033515	-1.7863574504183075	30.881853546079068	223.71817891031117	149.14545260687368	-149.14545260687424	35.272899541525724	35.272899541525724	17.897454312824898	11.931636208549927	['Continuous']	28.11391781639576	0.09921052631578947	1.7761169619653263	3.525292856912928	2.0	True	0.9666673724877984	0.08	1.0	30.881853546079068	223.71817891031117	149.14545260687368	-149.14545260687424	35.272899541525724	[35.27289954]	17.897454312824898	0.0	0.078	10.0	60.0	0.16666666666666666	68.18181818181817
cor	1	4	39	0 days 01:24:58.060892407	0 days 01:24:58.138892401	0.077999994	True	11.0	66.0	0.3666666666666667	1.0	76.92307692307693	287.2800000000001	127.68000000000004	66.15475308760476	66.15475308760476	0.006315722858505205	-1.7292786538891831	18.185045727735158	2294.300063712276	963.6971352045172	-1523.352809469964	77.70766562954138	149.04329043685038	317.79955969861845	71.58981725129958	['Unclassified', 'Hover-Continuous-Mix', 'Unclassified']	106.5433925545516	0.3759784075573549	1.739650103205705	4.4217239735315355	1.0	False	0.6310739134833462	0.0	0.0
cor	1	4	40	0 days 01:24:58.508892374	0 days 01:24:58.584892368	0.075999994	True	10.0	57.0	0.125	1.5	68.18181818181817	287.2800000000001	127.68000000000002	66.15475308760477	66.15475308760477	0.2427401842069197	-1.6614836006677978	27.09432832692353	1715.4008704047035	-1269.6968249483975	-1715.400870404617	62.941206323505405	76.25263870381669	130.3704661507509	130.3704661507509	['Unclassified', 'Hover-Continuous-Mix']	96.39506094802178	0.34016620498614963	2.5551510107521613	6.801149021644805	1.0	False	0.7701483444296299	0.0	0.0
cor	1	4	41	0 days 01:24:58.602892367	0 days 01:24:58.672225695	0.069333328	True	10.0	51.0	0.07142857142857142	1.0	66.23376623376622	287.2800000000001	127.68000000000004	66.15475308760476	66.15475308760476	0.405222255774652	-1.6264358136504191	4.0676318166860375	170.45194583642754	-170.4519458364273	170.45194583642734	62.08712127091875	62.08712127091877	11.931636208549927	11.931636208549927	['Continuous', 'Hover-Continuous-Mix', 'Unclassified']	102.44161944769293	0.3615037593984962	1.8070203995065257	3.4153684378882687	1.0	True	0.8342708742410601	0.022000000000000002	0.3142857142857143	8.259200121118155	437.1983578450452	-406.7603252914781	406.76032529147597	57.895552966486605	[57.89555297]	8.948727156412476	0.0	0.02	7.0	12.0	0.0	49.586776859504134
cor	1	4	42	0 days 01:24:59.021559003	0 days 01:24:59.129558995	0.10799999199999999	True	11.0	62.0	0.13392857142857142	1.0	52.18855218855219	287.27990838648185	127.67990838648184	66.15484065242674	66.15484065242674	2.4048470417507595	-1.3070917608569093	6.926431124941591	0.0	-0.008358460277748505	-1.3473995581821156e-13	73.08127177736831	73.08127177736831	5.684341886080803e-14	0.0	['Unclassified', 'Hover-Continuous-Mix', 'Unclassified']	58.00100934711771	0.20467836257309935	1.4728434723992745	3.1478534994363105	1.0	False	0.3756447469934558	0.0	0.0
cor	1	4	43	0 days 01:25:07.445558382	0 days 01:25:07.539558375	0.093999993	True	10.0	55.0	0.35	1.0	53.19148936170214	275.8193732268726	106.13206624637064	82.82640563760644	209.28501325056328	2.4971530487095603	3.469127243586789	6.402279041128361	181.53278259055352	-24.352355305038127	152.08913509854818	87.15405767337128	199.38390686765285	14.296378699263684	14.296378699263544	['Hover-Continuous-Mix']	32.494668823284904	0.1146696528555431	1.6919280499028535	3.999914907756576	1.0	False	0.6205816255909142	0.0	0.0
cor	1	4	44	0 days 01:25:18.102890931	0 days 01:25:18.198890923	0.09599999199999999	True	9.0	59.0	0.3333333333333333	1.0	55.87121212121212	251.030947503222	107.15999999999997	105.93318656622034	232.39179417917717	0.5497284204428426	0.022415818363263892	41.00449638944233	983.993789319996	-894.9015726643007	894.9015726643008	64.928690176778	157.13809156122576	97.31435470769358	85.91055097577271	['Unclassified', 'Hover-Continuous-Mix']	119.81351359418886	0.4228070175438596	1.7967100269753746	5.421204985498051	1.0	False	0.7901687247224651	0.0	0.0
cor	1	4	45	0 days 01:25:18.200224257	0 days 01:25:18.318890915	0.118666658	True	11.0	72.0	0.1111111111111111	1.0	55.46995377503852	251.1156857233673	107.16	105.93318656622036	232.39179417917717	0.6050904867392787	0.016438584431575615	15.33872281094509	463.02296575325767	148.93515110276815	463.0229657532586	112.4291293646944	238.88773697765131	54.63670995888423	54.63670995888423	['Continuous', 'Hover-Continuous-Mix', 'Unclassified', 'Fragmented-Continuous-Mix', 'Unclassified', 'Hover-Continuous-Mix']	71.89316393456777	0.25370205173951826	1.454691106732377	3.7273576820274608	2.0	True	0.8511029369970989	0.055999999999999994	0.4745762711864407	8.757831129109379	353.418721792095	-305.1242840822542	356.7036110741365	97.3816727450785	[223.84028036]	19.975402220151626	0.002	0.055999999999999994	10.0	35.0	0.0	56.81818181818181
cor	1	4	46	0 days 01:25:23.338890545	0 days 01:25:23.459557203	0.120666658	True	10.0	106.0	0.3208333333333333	1.0	78.98658718330849	252.58770645057166	112.104631744979	105.80636816495804	232.26497577791488	2.887785251899313	-0.7893119855074955	1.2986570652356078	0.0	0.5167824958719025	-5.963899683756907e-14	104.50771109972244	230.96631871267934	0.0	0.0	['Hover-Continuous-Mix']	18.582056390364638	0.06557377049180327	1.5195635346868848	4.796850519840284	1.0	False	0.3426686409975409	0.0	0.0
cor	1	4	47	0 days 01:25:25.282223735	0 days 01:25:25.356223730	0.073999995	True	11.0	73.0	0.4444444444444444	1.0	89.68058968058969	253.149733010172	110.57999999999996	105.30447701655598	231.76308462951283	0.8749511045113649	-1.4383429636061358	39.13900415594769	1124.3060024054937	-847.5484103844515	846.5012174984746	66.61428954129575	69.04672197372818	86.07395013619617	62.64109009488711	['Unclassified', 'Hover-Continuous-Mix', 'Unclassified']	108.27153667623348	0.38207681365576107	1.3376655094063137	3.3246490783706983	1.0	False	0.6412711218923601	0.0	0.0
cor	1	4	48	0 days 01:25:27.168890263	0 days 01:25:27.224890259	0.055999995999999996	True	8.0	31.0	0.16666666666666666	1.0	50.32467532467533	254.22	110.57999999999996	104.23503096450376	230.6936385774606	1.5495077620680464	-0.9155757281306924	28.23682919458301	0.0	7.349042009861603e-13	-2.598556290779795e-13	75.99820176992075	202.45680938287757	0.0	0.0	['Unclassified', 'Hover-Continuous-Mix']	93.64203774388737	0.3304511278195488	1.6553443551575586	2.9609390281363224	1.0	False	0.4066571287912266	0.0	0.0
cor	1	4	49	0 days 01:26:09.630887135	0 days 01:26:09.703553796	0.07266666100000001	False	11.0	50.0	0.1	1.0	61.42506142506143	312.36	131.70324714646299	113.64884261365835	128.64884261365836	0.02233837101891021	-4.540389385607722	30.943144700481266	4376.897136995779	455.30148032327764	44.71372041936322	95.34699144655373	125.40896544830468	224.79862760402386	3.3088153110329017	['Unclassified']	212.592734337474	0.7502133712660028	1.9027963198459228	5.022826460808076	1.0	False	0.4418241771288544	0.0	0.0
cor	1	4	50	0 days 01:26:09.886887116	0 days 01:26:09.954887111	0.06799999500000001	True	11.0	66.0	0.4642857142857143	2.0	88.23529411764706	312.36000000000007	131.25343942498586	113.19909799425636	128.19909799425636	0.2177605922955233	-4.311360230856523	8.912364956870414	511.35350523117035	218.15544841651356	-511.35350523117035	105.68105619319807	120.68105619319807	37.87394207385039	31.89293520684789	['Continuous']	36.05810648319133	0.12724458204334366	1.5859170752196885	2.9230706238076314	1.0	True	0.9808177902327276	0.068	1.0	8.912364956870414	511.35350523117035	218.15544841651356	-511.35350523117035	105.68105619319807	[120.68105619]	37.87394207385039	0.0	0.066	11.0	66.0	0.4642857142857143	88.23529411764706
cor	1	4	51	0 days 01:26:10.002887107	0 days 01:26:10.065553770	0.062666663	True	10.0	59.0	0.5	1.5	83.80681818181817	312.36	131.25389618566123	113.19955469085426	128.19955469085426	0.4124879202086312	-4.282018924378407	61.5579417257241	466.0795393964815	467.3514933149013	-466.0795393964823	51.64161296513018	51.64161296513018	29.829090521374827	29.829090521374827	['Continuous']	25.541158758927182	0.09013157894736842	1.7573790133325216	3.8332856709542105	1.0	True	0.9890130862533081	0.064	1.0	61.5579417257241	466.0795393964815	467.3514933149013	-466.0795393964823	51.64161296513018	[51.64161297]	29.829090521374827	0.0	0.062	10.0	59.0	0.5	83.80681818181817
cor	1	4	52	0 days 01:26:11.264220348	0 days 01:26:11.350887008	0.08666666	True	9.0	59.0	0.25	1.0	62.367864693446094	311.08561457749437	127.6510558700105	109.57587417845379	124.57587417845379	2.054410409082337	-5.751644654690168	6.1311462181604925	0.0	1.9882446247991603	-3.3445081329731206e-13	115.70702039661423	130.7070203966142	1.2789769243681806e-13	1.4210854715202004e-14	['Hover-Continuous-Mix']	17.689344378954836	0.06242350061199513	1.6921845000623539	3.2370262843848234	1.0	False	0.4428148045134076	0.0	0.0
cor	1	4	53	0 days 01:26:15.059553402	0 days 01:26:15.148886728	0.08933332599999999	True	10.0	88.0	0.31666666666666665	2.0	90.9090909090909	311.99329947105184	121.17751868128404	103.11844862957831	118.11844862957831	0.07992801726098585	-3.3304810563645764	32.738047347040784	294.06538208759565	226.7326236954211	-226.2719945390164	70.3804012825375	73.44858310071935	31.84357172798336	19.911935519433413	['Unclassified', 'Hover-Continuous-Mix', 'Unclassified']	57.827759578938	0.20406698564593306	2.4277210526650417	5.209455681240402	1.0	False	0.766894426244271	0.0	0.0
cor	1	4	54	0 days 01:26:15.544220033	0 days 01:26:15.612886694	0.06866666099999999	True	10.0	61.0	0.5	1.0	81.55080213903744	311.826075461053	120.81894602490513	102.75712531710332	117.75712531710332	0.4695939824258377	-2.896846887852809	6.968888212508423	0.0	0.5310946121843789	-6.369806642931719e-13	109.72601352961176	124.72601352961172	2.842170943040401e-13	0.0	['Hover']	12.63349716199404	0.04458204334365325	1.8454219845720907	4.2017132875635745	1.0	False	0.1382344823821896	0.0	0.0
cor	1	4	55	0 days 01:26:16.034886663	0 days 01:26:16.133553323	0.09866666	True	11.0	111.0	0.3901515151515152	2.0	100.9090909090909	311.75577916806765	120.86737040702677	102.80436546112215	117.80436546112215	1.67393321296369	-2.9128217968597885	15.00084989741758	601.8748510746127	74.6601999148765	-213.1477290496394	89.46970420721863	115.61556496851429	55.82781063926572	22.698624337084965	['Hover-Continuous-Mix', 'Continuous', 'Fragmented-Continuous-Mix']	38.89713403987275	0.13726315789473684	2.345490287441823	5.2123516145445725	2.0	True	0.9892858922111956	0.09	0.9	15.12261820093999	576.9214379400597	159.8469913306339	-313.7114451729929	88.91675831815229	[116.30104805]	50.292404910781364	0.004	0.092	11.0	105.0	0.3318181818181818	106.06060606060606
cor	1	4	56	0 days 01:26:17.276219905	0 days 01:26:17.322886568	0.046666663	True	10.0	25.0	0.4166666666666666	1.0	49.40711462450593	310.18537436777393	117.93066733933432	101.10886050386236	116.10886050386236	3.7802441043601664	-5.289135016695614	8.61715302574935	0.0	-1.7389457696946788	-4.745189748380495e-13	109.72601352961176	124.72601352961178	0.0	0.0	['Hover']	8.689343760574403	0.030663615560640727	2.21934240386194	3.3346152553126402	1.0	False	0.07141360848620816	0.0	0.0
cor	1	4	57	0 days 01:26:17.901553192	0 days 01:26:17.930219857	0.028666665	True	8.0	19.0	0.6666666666666666	1.5	61.68831168831169	312.96572973289886	116.24047318881864	102.24975494585968	117.24975494585968	2.374001530904213	-7.652971108955496	4.699362538358015	160.2055410804241	-160.2055410804249	-160.2055410804247	106.94911748421768	121.94911748421768	2.9905034335012597	2.9905034335012597	['Hover-Continuous-Mix']	14.48841539609634	0.05112781954887218	2.49544118406126	4.642077679958557	1.0	False	0.3502511620627442	0.0	0.0
cor	1	4	58	0 days 01:26:22.116886215	0 days 01:26:22.165552878	0.048666663000000006	True	10.0	29.0	0.0	1.0	52.72727272727273	288.26746233401883	116.18271760258928	79.13497630117436	94.13497630117438	1.7654312508133867	-8.01583609893072	3.1783985656162517	0.0	0.017393547662145455	-2.9103830456733704e-13	75.95657773555808	90.95657773555813	0.0	0.0	['Hover']	11.931636208549929	0.042105263157894736	1.2030874207605486	2.5324844120818035	1.0	False	0.05357295996995489	0.0	0.0
cor	1	4	59	0 days 01:26:24.587552700	0 days 01:26:24.658219361	0.07066666099999999	True	10.0	53.0	0.3333333333333333	1.0	68.83116883116882	289.07939078650594	114.9531468697333	79.89154723788512	94.89154723788513	3.912874138805389	0.12971852045272467	7.214919179334258	39.53861234631664	-2.1741290652875422	2.013881125354341e-13	87.10646641721937	102.10646641721937	5.535405728484292	1.4210854715202004e-14	['Hover-Continuous-Mix']	22.41443087749022	0.07909774436090224	1.520373385084297	3.289863593301169	1.0	False	0.6803116965493322	0.0	0.0
cor	1	4	60	0 days 01:26:26.840219201	0 days 01:26:26.918219195	0.077999994	True	11.0	62.0	0.2	1.0	72.26107226107226	289.55999999999995	111.71999999999996	80.22822365248575	95.22822365248577	0.0077781604561711955	0.11830989541294913	18.86629232130891	363.9056054704449	363.90560547032914	257.4554953072029	88.84802237733116	201.01706491170376	20.081528633961845	20.081528633961845	['Hover-Continuous-Mix', 'Continuous', 'Hover-Continuous-Mix', 'Unclassified']	78.32048383048156	0.2763832658569501	1.4297929041724566	3.8009728935594267	1.0	True	0.8938067753033503	0.05	0.6410256410256411	17.23535302106383	501.2735879451967	539.18323520391	373.1210633494349	86.48470631916375	[208.48496963]	17.230577700981687	0.008	0.055999999999999994	11.0	42.0	0.25	76.36363636363637
cor	1	4	61	0 days 01:26:28.446885749	0 days 01:26:28.506219078	0.059333329	True	9.0	26.0	0.0	1.0	39.39393939393939	289.5599999999999	111.71999999999996	80.22822365248568	95.2282236524857	9.421600369470642e-13	0.07388459573007823	9.566868404283184	0.0	2.3571071020948387e-12	-2.425319204727809e-13	89.79509205676884	104.79509205676884	0.0	0.0	['Unclassified', 'Hover-Continuous-Mix']	66.02172035397625	0.2329824561403509	1.4909972561328462	3.0285537838785426	1.0	False	0.2649781715228849	0.0	0.0
cor	1	4	62	0 days 01:26:30.114885626	0 days 01:26:30.166218956	0.05133333	True	10.0	73.0	0.6	3.0	127.62237762237764	289.5600000000042	111.71999999999564	80.2282236524898	95.22822365248982	0.07368785941640539	0.44131461247960585	29.506359129785732	285.4060939014752	285.40609390191025	285.4060939014762	109.73458278227554	124.73458278227552	14.841116882876733	14.841116882876733	['Continuous']	21.453999721142658	0.0757085020242915	2.3255660598328833	4.535870328126832	1.0	True	0.948495306278792	0.052000000000000005	1.0	29.506359129785732	285.4060939014752	285.40609390191025	285.4060939014762	109.73458278227554	[124.73458278]	14.841116882876733	0.0	0.05	10.0	73.0	0.6	127.62237762237764
cor	1	4	63	0 days 01:26:32.096218813	0 days 01:26:32.211552138	0.115333325	True	10.0	88.0	0.3818181818181817	1.0	68.9655172413793	290.5260191586272	111.38763623514313	81.17854391495976	96.17854391495977	0.7404689358626816	0.8254442044655852	18.3114892940707	208.56789701582463	33.717581283706565	35.789261175545235	99.49003320903047	114.49003320903046	22.81002462171468	5.535405728484322	['Unclassified', 'Hover-Continuous-Mix', 'Continuous']	43.6636169873228	0.1540834845735027	2.1430017249284097	8.685510016518151	1.0	True	0.9164294391030392	0.078	0.6724137931034483	20.935226545417233	256.9528430445181	-1.8331045068127003	-9.328150787414647e-14	102.15517420467016	[117.1551742]	20.04232175747248	0.038	0.114	10.0	71.0	0.4	82.75058275058275
cor	1	4	64	0 days 01:26:32.567552112	0 days 01:26:32.631552107	0.063999995	True	8.0	39.0	0.0	1.0	55.39772727272727	290.5338853271745	111.45085141654847	81.18920728603842	96.18920728603842	0.440323440162998	0.7514648147537439	8.240413243046195	177.9146050431459	132.86312583829962	89.74259219254624	77.31431265910993	151.05794795349328	17.196039682662768	5.743525900322979	['Unclassified']	187.3639748373856	0.6611842105263158	1.3823905849190932	3.200478685212765	1.0	False	0.5590356907198542	0.0	0.0
cor	1	4	65	0 days 01:26:33.535552041	0 days 01:26:33.628885367	0.093333326	True	9.0	48.0	0.0	1.0	47.43083003952569	290.7000000000001	111.63934282042949	81.36352199164206	96.36352199164206	0.4099649595886014	0.3819609278173978	5.4069442560839525	0.0	-0.07414051785031439	-1.5817299161268314e-13	75.95657773555813	90.95657773555814	0.0	0.0	['Unclassified', 'Hover-Continuous-Mix']	65.8833825428626	0.23249427917620136	1.4052165790264628	2.834263734774003	1.0	False	0.30918860621991584	0.0	0.0
cor	1	4	66	0 days 01:26:33.906218680	0 days 01:26:33.949552010	0.04333333	True	10.0	48.0	0.3333333333333333	2.0	99.17355371900827	290.6999999999999	110.64046074161962	81.3192001352168	96.3192001352168	0.3831760001006424	0.19673875308030955	25.200146154708317	400.2004487981563	400.27895484687457	400.2004487981563	106.51934628992512	121.51934628992512	17.608819747118886	17.608819747118886	['Continuous']	21.55829724044816	0.07607655502392344	1.7543935451934731	3.9399269930102343	1.0	True	0.9744008631556752	0.044000000000000004	1.0	25.200146154708317	400.2004487981563	400.27895484687457	400.2004487981563	106.51934628992512	[121.51934629]	17.608819747118886	0.0	0.042	10.0	48.0	0.3333333333333333	99.17355371900827
cor	1	4	67	0 days 01:26:34.080218667	0 days 01:26:34.191551992	0.111333325	True	10.0	67.0	0.22916666666666666	1.0	54.383116883116884	290.7	110.58962184453615	81.3169443391172	96.3169443391172	0.240937427736346	0.07190821089813378	10.2905969021249	255.76300435670154	104.37986408111273	-255.7630043567006	77.41738429084033	85.45309857655461	28.64545648795061	28.645456487950447	['Unclassified', 'Hover-Continuous-Mix', 'Continuous', 'Hover-Continuous-Mix', 'Unclassified']	56.675271990612146	0.2	1.9383150286064803	6.163636739619057	1.0	True	0.829622086412622	0.057999999999999996	0.5178571428571429	8.254172730382813	406.54160906409487	124.40248444941572	-416.7429812024875	75.4624783612893	[82.18661629]	22.679638383675595	0.034	0.09	10.0	45.0	0.35	70.53291536050156
cor	1	4	68	0 days 01:26:34.970218602	0 days 01:26:35.013551932	0.04333333	True	10.0	43.0	0.16666666666666666	2.0	88.84297520661156	290.69999999999993	110.58414685397688	81.31670140579142	96.31670140579139	0.02236239315957432	-0.5723565534384275	24.92065363703092	502.1494294856989	502.1366133037345	502.14942948569876	106.23735504282234	121.2373550428223	20.59932318062013	20.59932318062013	['Hover-Continuous-Mix', 'Unclassified']	74.57272630343704	0.2631578947368421	2.586515033149245	5.300732319015991	1.0	False	0.7731970504869851	0.0	0.0
cor	1	4	69	0 days 01:26:39.120884963	0 days 01:26:39.211551623	0.09066666	True	11.0	68.0	0.275	1.0	67.19367588932806	280.02193792251927	110.513611953569	78.4554839092458	204.91409152220268	2.4767133413374967	-1.436113288067461	2.457282139325049	0.0	1.438509773160786	-1.5817299161268314e-13	75.99820176992075	202.45680938287768	0.0	0.0	['Hover']	19.388908838893627	0.06842105263157895	1.6862979028787746	3.5408074285895816	1.0	False	0.17636795829400215	0.0	0.0
cor	1	4	70	0 days 01:26:39.398218276	0 days 01:26:39.476884936	0.07866666	True	10.0	60.0	0.25	1.0	69.93006993006993	279.6169311652758	110.57419930672128	78.8578074198135	205.31641503277044	0.6644984434886728	-1.008437209038631	4.317507519964576	292.4052238954023	-0.15805861157899218	6.529705551190254e-13	78.92225400887477	205.38086162183163	22.80760746384141	0.0	['Hover-Continuous-Mix']	21.415757297397302	0.07557354925775975	1.801984702036356	3.5983997823595404	1.0	False	0.3643546410041461	0.0	0.0
cor	1	4	71	0 days 01:26:45.084217857	0 days 01:26:45.142884519	0.058666662	True	10.0	55.0	0.4642857142857143	2.0	86.20689655172414	283.70479023026564	109.49645057085472	74.81528836019558	201.27389597315238	0.9354010804847376	-1.3133972349923453	30.870057896028214	152.76051751507256	49.73011820696816	49.63970946330489	105.20022214270942	120.20022214270942	8.860110015874199	2.8791031488716783	['Continuous']	37.23493368530235	0.13139745916515427	2.489143441207642	5.2174417586778965	1.0	True	0.8865777213553974	0.057999999999999996	1.0	30.870057896028214	152.76051751507256	49.73011820696816	49.63970946330489	105.20022214270942	[120.20022214]	8.860110015874199	0.0	0.055999999999999994	10.0	55.0	0.4642857142857143	86.20689655172414
cor	1	4	72	0 days 01:26:45.446217830	0 days 01:26:45.495551160	0.04933333	True	10.0	36.0	0.16666666666666666	1.0	65.45454545454545	284.46157551387523	108.62238106085377	74.9973747201945	89.99737472019449	1.3937990443809054	-1.1578426227021057	0.959203015363606	0.0	-1.7691635064982636	-1.5234036254696574e-13	75.95657773555808	90.95657773555813	2.273736754432321e-13	0.0	['Hover-Continuous-Mix']	64.5501518882551	0.2277894736842105	1.6491099752152218	3.3004074793287637	1.0	False	0.4999452613814864	0.0	0.0
cor	1	4	73	0 days 01:26:55.484883757	0 days 01:26:55.528217087	0.04333333	True	9.0	33.0	0.4166666666666666	2.0	68.18181818181817	279.30000000000007	194.93999999999497	0.0	0.0	0.1217002210223372	-3.1636356664825893	1.4914545260687406	0.0	0.0	0.0	1.4914545260687406	1.4914545260687406	0.0	0.0	['Hover']	2.9829090521374813	0.010526315789473686	1.6789515658663559	3.626972955280536	1.0	False	0.03940611066008167	0.0	0.0
cor	1	4	74	0 days 01:26:56.200883704	0 days 01:26:56.268217033	0.067333329	True	9.0	52.0	0.25	1.0	69.5187165775401	279.2999999999999	194.94	0.0	0.0	0.0001042279431858663	-1.0041937463578647	23.16141146365575	504.46256028795636	-153.5320835659	-153.5320835659	23.16141146365575	23.16141146365575	32.8119995735123	8.948727156412447	['Continuous']	31.320545047443566	0.11052631578947368	4.490232881962597	10.263573583613624	1.0	True	0.9466992354488288	0.068	1.0	23.16141146365575	504.46256028795636	-153.5320835659	-153.5320835659	23.16141146365575	[23.16141146]	32.8119995735123	0.0	0.066	9.0	52.0	0.25	69.5187165775401
cor	1	4	75	0 days 01:27:00.017550090	0 days 01:27:00.091550085	0.073999995	True	9.0	50.0	0.3666666666666667	1.0	61.42506142506143	279.29999999999984	194.93999999999988	0.0	0.0	0.0	0.0	1.4914545260687413	0.0	1.5363086178596762e-15	1.5363086178596762e-15	1.4914545260687413	1.4914545260687413	0.0	0.0	['Hover', 'Hover-Continuous-Mix', 'Unclassified']	26.68494314209477	0.0941678520625889	1.3226999205143677	3.7459152460863687	1.0	False	0.3115062613577803	0.0	0.0
cor	1	4	76	0 days 01:27:02.236883260	0 days 01:27:02.278216590	0.04133333	True	10.0	44.0	0.55	2.0	95.23809523809523	279.3	194.9399999999941	0.0	0.0	0.032845543466837095	0.0	1.4914545260687408	0.0	0.0	0.0	1.4914545260687408	1.4914545260687408	0.0	0.0	['Hover-Continuous-Mix', 'Unclassified', 'Hover-Continuous-Mix']	109.08924533531362	0.3849624060150375	2.619547148761188	4.560413092942265	1.0	False	0.15247674750831505	0.0	0.0
cor	1	4	77	0 days 01:27:03.870883139	0 days 01:27:03.960883133	0.089999994	True	11.0	108.0	0.5	3.0	109.09090909090908	279.28030152271674	194.6891983664191	0.0	0.0	0.3768801322061292	0.0	50.30154128342604	4839.6246676840365	662.8686782527675	662.8686782527675	50.30154128342604	56.921923844001924	690.7010921618503	59.65818104274968	['Hover-Continuous-Mix', 'Unclassified', 'Fragmented', 'Unclassified']	176.85336335784004	0.624093567251462	1.7802412831011136	3.8212922167046512	1.0	False	0.6780529420717534	0.0	0.0
cor	1	4	78	0 days 01:27:03.970216465	0 days 01:27:04.040883127	0.070666662	True	10.0	65.0	0.5	2.0	84.41558441558442	279.2999999279085	194.87124812468346	0.0	0.0	0.4439818500034233	0.0	48.45096560400454	553.9688239683894	-340.9038916728553	-340.9038916728553	48.45096560400454	48.450965604004544	41.76072672992482	23.86327241709989	['Hover-Continuous-Mix', 'Unclassified']	65.36832122826995	0.2306766917293233	3.050183469391309	5.447392406999099	2.0	False	0.7816347854538441	0.0	0.0
cor	1	4	79	0 days 01:27:05.400883027	0 days 01:27:05.486216354	0.08533332699999999	True	10.0	63.0	0.25	1.0	66.59619450317125	279.29999999999984	194.9399999999999	0.0	0.0	0.001044555943451415	0.0	1.491454526068741	0.0	0.0	0.0	1.491454526068741	1.491454526068741	0.0	0.0	['Hover']	2.9829090521374817	0.01052631578947368	2.1886009864118363	4.363113395143556	1.0	False	0.03802470695442702	0.0	0.0
cor	1	4	80	0 days 01:27:07.014882908	0 days 01:27:07.081549570	0.066666662	False	11.0	62.0	0.26666666666666666	2.0	82.88770053475936	279.2999999999999	194.9399999999999	0.0	0.0	0.005439676636313472	0.0	45.7086945930479	1337.9224425028415	-372.8636315171837	-372.8636315171837	45.7086945930479	45.7086945930479	92.470180616262	26.84618146923734	['Unclassified']	204.15380483305645	0.7204334365325077	1.9735591199244096	3.799035124943647	1.0	False	0.5151715473023575	0.0	0.0
cor	1	4	81	0 days 01:27:07.440882876	0 days 01:27:07.513549538	0.072666662	True	10.0	51.0	0.25	1.0	62.65356265356266	279.2999999999998	194.93999999999986	0.0	0.0	0.10629984402343948	0.0	1.4914545260687413	0.0	1.5363086178596762e-15	1.5363086178596762e-15	1.4914545260687413	1.4914545260687413	0.0	0.0	['Hover']	5.15962646856213	0.01820768136557611	2.6640717006452475	4.154693743711223	1.0	False	0.04671182186482237	0.0	0.0
cor	1	4	82	0 days 01:27:11.458882581	0 days 01:27:11.552882574	0.093999993	True	10.0	96.0	0.5	2.0	92.84332688588007	279.32410946725946	194.9403600547716	0.0	0.0	0.11599632045349775	0.0	23.831539342077107	444.2630503183484	-253.8646001819129	-253.8646001819129	23.831539342077107	23.831539342077107	41.76072672992476	23.863272417099857	['Continuous']	44.80710193210771	0.1581187010078387	2.7245887645357256	5.375503140272029	1.0	True	0.9246248019602432	0.094	1.0	23.831539342077107	444.2630503183484	-253.8646001819129	-253.8646001819129	23.831539342077107	[23.83153934]	41.76072672992476	0.0	0.092	10.0	96.0	0.5	92.84332688588007
cor	1	4	83	0 days 01:27:12.894882475	0 days 01:27:12.946215804	0.051333329	True	10.0	59.0	0.5625	2.0	103.14685314685316	279.29999999999995	194.91857044130956	0.0	0.0	0.1689596928881651	0.002282155306547667	54.724908379599206	1261.9999835966278	1147.2727123605707	1147.2727123605707	54.724908379599206	54.72490837959923	65.62399914702458	59.65818104274968	['Unclassified', 'Hover-Continuous-Mix', 'Unclassified']	137.67272548326838	0.4858299595141701	2.7779100502062155	5.432883673733194	1.0	False	0.5673404653436617	0.0	0.0
cor	1	4	84	0 days 01:27:12.969549136	0 days 01:27:13.042215797	0.07266666100000001	True	10.0	129.0	0.6923076923076923	4.0	162.87878787878788	279.29999999999995	194.9919843533185	0.0	0.0	0.04792167097958264	0.002767036318631269	100.7890228786197	57.66047633837843	-57.66047633837854	-57.66047633837854	100.7890228786197	115.78902287861965	2.7677028642421675	2.7677028642421675	['Unclassified', 'Hover-Continuous-Mix', 'Unclassified']	80.12425148380403	0.2827485380116959	8.008710501201058	16.633348262520233	1.0	False	0.5409543787201392	0.0	0.0
cor	1	4	85	0 days 01:27:14.862215663	0 days 01:27:14.973548988	0.111333325	True	9.0	57.0	0.3194444444444444	1.0	46.266233766233775	278.78000353333806	194.2501422998233	0.0	0.0	0.03304860271178372	0.1087347004628252	1.4914545260687413	0.0	0.0	0.0	1.4914545260687413	1.4914545260687413	0.0	0.0	['Hover']	2.982909052137482	0.010526315789473686	1.7129004285087126	5.388736558333886	2.0	False	0.03951297519659045	0.0	0.0
cor	1	4	86	0 days 01:27:18.226882082	0 days 01:27:18.400882069	0.17399998700000002	True	11.0	86.0	0.09090909090909093	1.0	44.932079414838036	279.3667920241798	192.61372853022218	0.939501364643728	0.939501364643728	1.467328065815394	1.2189435489606748	25.135238108351164	325.7199539690354	322.28468339067337	325.7199539690355	26.0747394729949	26.0747394729949	56.675271990612316	56.675271990612195	['Hover-Continuous-Mix', 'Continuous', 'Hover-Continuous-Mix', 'Unclassified']	31.954841799909573	0.11276467029643075	1.4526136212149048	5.4492310268912645	2.0	True	0.9782041784423332	0.134	0.7701149425287356	29.05361668550684	422.94979097471764	419.3437752299505	422.9497909747177	30.02943515920496	[30.02943516]	56.675271990612295	0.032	0.16399999999999998	11.0	76.0	0.16666666666666666	51.560379918588865
cor	1	4	87	0 days 01:27:32.930880999	0 days 01:27:33.002214327	0.071333328	True	10.0	76.0	0.2875	2.0	95.95959595959594	281.6104455403945	169.55274295246662	24.07595530482128	24.07595530482128	1.041278160167577	10.734746639694613	19.756236044643387	414.2929239079837	80.32629118654576	82.85858478159645	43.832191349464665	43.83219134946467	29.82909052137486	5.965818104274965	['Continuous', 'Fragmented-Continuous-Mix']	34.80060560827062	0.12280701754385966	1.6750081644964336	3.88631377474608	2.0	True	0.9783096443784862	0.068	0.9444444444444444	19.971177359596687	409.2192303585645	107.13324196838094	109.66577397564251	44.04177482861812	[44.04177483]	26.84618146923738	0.0	0.066	10.0	76.0	0.2875	101.60427807486631
cor	1	4	88	0 days 01:27:37.950213962	0 days 01:27:37.998213959	0.047999997	True	11.0	41.0	0.3333333333333333	1.5	77.65151515151516	282.4902518013668	110.62952935866413	75.98452402085556	202.44313163381244	3.4593922697157304	16.163939316537146	14.268432413966082	0.0	-2.4381238419364744	-1.5158245029548806e-13	90.25295643482167	216.71156404777847	2.8421709430404014e-14	0.0	['Hover-Continuous-Mix']	41.014999466890366	0.14473684210526316	1.4571825044420423	2.7993277603466935	1.0	False	0.5073698106036165	0.0	0.0
cor	1	4	89	0 days 01:27:52.310879571	0 days 01:27:52.358212901	0.04733333	True	8.0	31.0	0.45	1.0	58.71212121212122	279.24876544974825	192.12839587029416	1.419274240790679	1.419274240790679	1.8830332413907132	0.2290614926765272	0.0721802852780619	0.0	-0.4737769045459523	0.0	1.4914545260687408	1.4914545260687408	1.7763568394002505e-15	0.0	['Hover']	2.9829090521374817	0.010526315789473684	1.8104114091225083	3.733499391851495	1.0	False	0.029145126391376886	0.0	0.0
cor	1	4	90	0 days 01:28:07.838878427	0 days 01:28:07.900211756	0.06133332900000001	True	11.0	48.0	0.4	1.0	70.38123167155427	286.2368597767075	126.2470139358326	67.54127452059146	67.54127452059146	3.2777478665079887	20.259087720963787	5.5399972567768465	0.0	6.309340645887611	1.0635220302989947e-13	73.08127177736831	73.08127177736831	1.8474111129762605e-13	1.4210854715202004e-14	['Hover']	14.048539406841044	0.04957555178268254	2.0071847864789523	3.947975443598033	1.0	False	0.14655954218907666	0.0	0.0
cor	1	4	91	0 days 01:28:08.120211740	0 days 01:28:08.203545067	0.083333327	True	10.0	49.0	0.1	1.0	53.03030303030303	287.7353732035635	124.96687568751145	68.88503599803367	68.88503599803367	2.86924930627192	17.3301517116273	4.196235779334646	0.0	-13.400980453500928	-1.7323708605198632e-13	73.08127177736833	73.08127177736831	2.273736754432321e-13	0.0	['Hover-Continuous-Mix']	31.17850175924653	0.11002506265664162	1.485768053237144	3.5452631309081104	1.0	False	0.4870515683638214	0.0	0.0
cor	1	4	92	0 days 01:28:14.738211253	0 days 01:28:14.894211241	0.155999988	True	10.0	85.0	0.0625	1.0	49.533799533799545	288.3345271362885	126.52888906639791	67.35040242529472	67.35040242529472	2.671656907176152	3.2007473764110728	9.420528966740628	36.17313347712813	52.349289767761675	36.17313347712764	76.77093139203538	86.57862369972769	5.643008822432363	5.643008822431938	['Hover-Continuous-Mix']	31.54999958991567	0.11133603238866396	1.4643206162001796	5.020100642282301	2.0	False	0.5707748326261951	0.0	0.0
cor	1	4	93	0 days 01:28:21.038877455	0 days 01:28:21.093544118	0.054666663	True	10.0	29.0	0.4583333333333333	1.0	47.077922077922075	286.08285951030194	111.21905610066216	76.73228018008031	91.73228018008028	3.1777995239138583	1.6011702028015304	3.5987812649771085	557.7783599941941	-486.4392640515581	-409.50856369539315	79.6703891385213	102.63171825373252	28.4678852954264	22.93247956694201	['Unclassified', 'Hover-Continuous-Mix', 'Hover']	86.50436251198695	0.30526315789473685	2.3619971890502534	5.348264186167634	1.0	False	0.4980717866611595	0.0	0.0
cor	1	4	94	0 days 01:28:21.662210743	0 days 01:28:21.786210733	0.12399999	True	11.0	161.0	0.6	2.0	118.0351906158358	285.5692884774632	111.69315649927792	76.2402514894326	91.24025148943257	0.3962312236993306	1.1739944345565976	37.08577475620565	660.0023491881677	615.172559518164	615.3619804100679	113.32602624563822	128.3260262456382	81.84029129933312	76.30488557084855	['Continuous', 'Hover-Continuous-Mix', 'Unclassified', 'Fragmented-Continuous-Mix', 'Continuous']	55.761154700440976	0.19677419354838716	4.550044895155996	14.078768157245126	2.0	True	0.95974607254863	0.094	0.7580645161290323	35.96445219887547	351.99666002377853	351.5359444914866	351.63814967776375	112.20533189339396	[109.40793016 169.15635026]	34.54923778646072	0.0	0.122	11.0	138.0	0.6923076923076923	133.46228239845266
cor	1	4	95	0 days 01:28:22.536210678	0 days 01:28:22.660877336	0.124666658	True	11.0	112.0	0.2	2.0	82.11143695014663	284.9958296636845	111.71999999999998	75.66854855956248	90.6685485595625	0.5217241321136433	1.4858950077578792	11.084816132042258	251.22854912045872	157.44032444339854	139.62762717515855	85.6546389486859	156.38394275516438	28.38463722668843	17.3138257697197	['Hover-Continuous-Mix', 'Unclassified', 'Fragmented-Continuous-Mix', 'Continuous', 'Hover-Continuous-Mix']	67.88523665429014	0.23955857385398985	3.532548797714045	9.66146736009998	2.0	True	0.8565273136696541	0.038	0.3064516129032258	16.028876406873177	438.0399890835559	450.27013649514333	450.15014731265666	89.50270618930054	[215.9613138]	17.105705597880984	0.068	0.10400000000000001	10.0	57.0	0.5125	136.36363636363637
cor	1	4	96	0 days 01:28:23.018210643	0 days 01:28:23.084877304	0.066666661	True	11.0	57.0	0.4166666666666666	1.0	78.51239669421487	284.99999999906976	111.71999999999993	75.6727147875917	90.6727147875917	0.1914260300272244	2.091535570514871	14.794252768967604	180.78236679621102	180.78236680327518	-180.78236679621102	60.87846201862408	60.8784620186241	11.931636208549927	11.931636208549927	['Hover-Continuous-Mix', 'Continuous']	22.507404666128263	0.07942583732057415	1.8248538702791204	5.073005981997209	1.0	True	0.9861351328729328	0.057999999999999996	0.8787878787878788	15.243091748564286	205.71786566465389	205.71786567983924	-205.71786566465389	60.4296230389921	[60.42962304]	11.931636208549927	0.008	0.064	11.0	54.0	0.4166666666666666	84.63949843260187
cor	1	4	97	0 days 01:28:23.447543944	0 days 01:28:23.494877274	0.04733333	True	7.0	40.0	0.6666666666666666	2.0	79.05138339920948	285.00000000000006	111.71999999999996	75.67271478852108	90.67271478852108	0.5165870534405518	2.7597603390797985	5.3764148845452695	0.0	-2.4714529939481746e-12	-1.5817299161268314e-13	78.84915270290095	205.30776031585785	0.0	0.0	['Hover-Continuous-Mix']	22.177280344152578	0.07826086956521737	2.461284277632775	5.423068647893958	1.0	False	0.7430735695713605	0.0	0.0
cor	1	4	98	0 days 01:28:25.488877127	0 days 01:28:25.550210456	0.06133332900000001	True	11.0	52.0	0.2	2.0	76.24633431085044	285.2464997189307	121.43701451782471	76.35012985345213	91.35012985345213	2.739576059219217	2.5188985218223494	34.06017732395459	144.33430897439428	-147.00112965228908	144.33430897439405	42.28995252949753	42.28995252949753	8.948727156412446	8.948727156412446	['Hover-Continuous-Mix', 'Continuous', 'Hover-Continuous-Mix', 'Unclassified']	38.48914905983847	0.1358234295415959	1.043895758129251	2.755477384473489	1.0	True	0.8203237851832426	0.05	0.8064516129032258	33.92995096136549	83.86636565787634	-62.40959411768082	59.65818104274957	42.416966721395	[42.41696672]	2.9829090521374866	0.006	0.054000000000000006	9.0	47.0	0.2	85.45454545454545
cor	1	4	99	0 days 01:28:32.576209939	0 days 01:28:32.660876599	0.08466666	True	11.0	62.0	0.25	1.0	67.09956709956711	275.1076511653091	118.60550059567544	83.04912425772774	209.50773187068458	1.3961256530716786	-8.905056144978829	2.206217030949106	101.81967617786329	1.73405031488621	33.939892059288724	84.75469392121701	211.2133015341738	8.552852798940746	2.85095093298024	['Hover-Continuous-Mix']	39.77212069516643	0.14035087719298245	1.9612251380568893	5.151583953224053	1.0	False	0.6038357699481969	0.0	0.0
cor	1	4	100	0 days 01:28:51.307541892	0 days 01:28:51.366875221	0.059333329	True	10.0	97.0	0.75	3.0	152.0376175548589	295.0930336714086	188.20842238378415	6.020957004941797	6.020957004941797	0.2264221630498236	-0.9306856243174408	54.10008923555334	308.57679849698087	208.3763659833349	205.71786566465417	60.12104624049514	60.12104624049515	17.897454312824916	11.931636208549952	['Continuous', 'Hover-Continuous-Mix', 'Unclassified']	57.90957918460008	0.2043557168784029	2.505856874542317	4.301258388998543	1.0	True	0.9701566306053429	0.044000000000000004	0.7586206896551724	53.75390295862788	372.8636315171853	307.7465677526587	305.0702439686063	59.79376781784684	[59.79376782]	14.91454526068744	0.0	0.042	10.0	81.0	0.7386363636363636	167.35537190082644
cor	1	4	101	0 days 01:28:51.912875181	0 days 01:28:52.056208504	0.143333323	True	10.0	203.0	0.6255555555555556	2.0	128.15656565656568	294.82506894470407	188.3429687637561	5.874945163852846	5.874945163852846	0.7574531899070145	-2.543669546978063	68.87513273981793	1284.8624421055586	-105.18578592162076	-165.71716956319102	74.51845746907622	153.55508722717428	187.87114259616817	23.863272417099857	['Continuous', 'Hover-Continuous-Mix', 'Unclassified', 'Hover-Continuous-Mix', 'Unclassified']	61.52249920033556	0.21710526315789475	2.5674130883965507	10.463027279789305	1.0	True	0.8923911663331272	0.022000000000000002	0.1527777777777778	23.395537922273558	271.1735501943165	272.9144897950518	271.17355019431665	29.42233019608334	[29.4223302]	5.965818104274984	0.0	0.02	9.0	17.0	0.0	70.24793388429752
cor	1	4	102	0 days 01:28:52.844208446	0 days 01:28:52.876208443	0.031999997	True	8.0	24.0	0.0	1.0	68.18181818181817	293.8883661189932	188.52489712248544	5.6526679652081695	5.6526679652081695	3.003715292373973	-3.4085126383506386	4.161213439139427	0.0	-2.7285956916182537	0.0	1.491454526068741	1.491454526068741	0.0	0.0	['Hover-Continuous-Mix']	12.118068024308519	0.042763157894736836	2.5718844335777016	4.104443795366523	1.0	False	0.2371432796409365	0.0	0.0
cor	1	4	103	0 days 01:29:10.736207128	0 days 01:29:10.828873788	0.09266666	True	11.0	64.0	0.08333333333333333	1.0	63.24110671936759	285.9695647615027	125.12516128407728	68.65051465358012	68.65051465358012	0.6691763506248206	1.2945018835604818	21.118507366258925	356.6521692773077	359.11331737372404	-356.65216927730796	47.53200728732121	47.532007287321214	32.81199957351234	32.81199957351234	['Hover-Continuous-Mix', 'Continuous']	20.167059026407763	0.0711670480549199	1.3338688020466063	3.3899123060823286	1.0	True	0.9870987041529062	0.07200000000000001	0.7826086956521741	24.595084091086374	414.3346504081063	416.7026010278557	-414.292923907984	44.08076710380945	[44.0807671]	29.82909052137485	0.02	0.09	10.0	55.0	0.2	69.44444444444444
cor	1	4	104	0 days 01:29:12.013540367	0 days 01:29:12.084873695	0.071333328	True	10.0	37.0	0.18333333333333332	1.0	48.05194805194805	285.31178549297834	126.71957978271523	67.02913489729931	67.02913489729931	1.5097544466005195	-1.5722722707589498	18.173565599100307	81.45574094229062	1.4901342916133595	-1.0394225163119181e-13	85.20270049639961	211.6613081093565	5.701901865960423	0.0	['Hover-Continuous-Mix', 'Unclassified']	76.53292368055595	0.27007518796992475	1.325428700170008	4.151471698064569	1.0	False	0.3879621062934173	0.0	0.0
cor	1	4	105	0 days 01:29:12.253540349	0 days 01:29:12.326207011	0.072666662	True	11.0	54.0	0.3333333333333333	1.0	68.18181818181817	285.7351215232377	126.94402261115093	66.82321448044418	66.82321448044418	0.9598972079677468	-1.8077121379433216	14.93361316591227	449.5360890072664	449.60019647549933	449.5360890072651	81.75682764635644	92.59016097968977	30.98274697640213	30.982746976402012	['Hover-Continuous-Mix', 'Continuous']	43.41789842555668	0.1532163742690058	2.155013008386634	6.958125445354416	1.0	True	0.9050727162325566	0.057999999999999996	0.8055555555555556	18.26254819248836	508.29036386015326	506.62180301730143	506.6153337307865	85.08523453285872	[98.53351039]	27.99983792426465	0.013999999999999999	0.07	9.0	47.0	0.3333333333333333	73.66771159874608
cor	1	4	106	0 days 01:29:12.827540307	0 days 01:29:12.973540296	0.145999989	True	11.0	115.0	0.2	1.0	71.60647571606475	285.76003924686273	126.55189754678631	67.21605037454982	67.21605037454982	0.4768486761266013	-2.09829905015933	35.87726667693238	179.76800817626025	-0.5168108129838818	-3.5118331378389616e-13	103.0933170514822	118.09331705148222	29.236632627235647	0.0	['Continuous', 'Hover-Continuous-Mix']	27.745140361662326	0.09790915645277576	1.6147205497615331	3.972943541751043	1.0	True	0.8443595422633287	0.098	0.6712328767123288	38.22485558564709	239.50268811483468	27.619316353537364	28.24186596165429	105.42693721309857	[120.42693721]	26.46892976299331	0.0	0.096	11.0	88.0	0.2	81.63265306122447
cor	1	4	107	0 days 01:29:13.264206941	0 days 01:29:13.342206936	0.077999995	True	11.0	65.0	0.3333333333333333	2.0	75.75757575757576	285.23043410423617	126.97707798192377	66.76835869186375	66.76835869186375	0.9677256009989365	-2.10620338329138	6.3129130855045785	0.0	2.2811548122854703	-1.865630157482928e-13	73.08127177736833	73.08127177736831	2.557953848736361e-13	0.0	['Unclassified', 'Hover-Continuous-Mix', 'Unclassified']	73.9608475235114	0.2609986504723347	2.3262128434740754	4.753991335460714	1.0	False	0.42489092244187016	0.0	0.0
cor	1	4	108	0 days 01:29:17.071539994	0 days 01:29:17.162206654	0.09066666	True	10.0	66.0	0.25	1.0	66.66666666666667	280.4400000809266	128.82000281538032	64.71993818597441	64.71993818597441	0.39406460430590495	-1.2840672106236184	16.98016544990666	0.0	7.118017801291095e-06	-2.3874235921539347e-13	81.70010363588108	208.15871124883802	2.842170943040401e-13	0.0	['Hover-Continuous-Mix']	25.851878451858173	0.0912280701754386	1.9226827705162939	4.0070521710063405	1.0	False	0.2837075581292714	0.0	0.0
cor	1	4	109	0 days 01:29:18.524206554	0 days 01:29:18.578206550	0.053999995999999995	True	10.0	64.0	0.5	3.0	107.74410774410774	281.58	129.95999999999998	63.63032126416778	63.63032126416778	0.6670793653692734	0.2876785359696833	35.70552470043775	317.11946828095336	317.1194682809517	317.1194682809515	99.33584596460554	225.79445357756242	17.124451287171397	17.124451287171397	['Continuous']	24.084228643184108	0.08499025341130599	2.570503235448656	4.541155491965089	1.0	True	0.9123841661516306	0.054000000000000006	1.0	35.70552470043775	317.11946828095336	317.1194682809517	317.1194682809515	99.33584596460554	[225.79445358]	17.124451287171397	0.0	0.052000000000000005	10.0	64.0	0.5	107.74410774410774
cor	1	4	110	0 days 01:29:19.085539846	0 days 01:29:19.230206502	0.144666656	True	10.0	125.0	0.457516339869281	1.5	78.91414141414141	281.5799999999752	129.9600000000093	63.63032126415735	63.63032126415735	0.16279690800006572	2.236845577913075	28.46378152976853	399.7435904446162	399.7435904432202	399.74359044461534	92.09410279392587	102.09410279392587	57.563077024024714	57.56307702402465	['Hover-Continuous-Mix', 'Continuous']	36.08491367238537	0.12733918128654972	2.247783523108474	6.6598407610690655	2.0	True	0.962847345559662	0.102	0.7083333333333334	37.813293033744046	506.5045921443487	505.8554796053878	505.8554796053888	101.4436142979118	[115.56126136]	51.597258919749756	0.042	0.142	10.0	95.0	0.4375	84.67023172905526
cor	1	4	111	0 days 01:29:19.688206468	0 days 01:29:19.743539797	0.055333329	True	9.0	40.0	0.29166666666666663	1.0	64.93506493506493	281.64111625625407	129.85032142382752	63.74254089527139	63.74254089527139	1.9230295550143115	4.901828005432103	18.670300473854773	203.63935235572654	203.21780198931626	203.63935235572663	82.41284136912613	208.87144898208297	11.403803731920874	11.403803731920705	['Hover-Continuous-Mix']	28.337635995306073	0.1	1.9243940981127683	4.619768087300736	1.0	False	0.7718701570797235	0.0	0.0
cor	1	4	112	0 days 01:29:30.649538994	0 days 01:29:30.758205653	0.108666659	True	11.0	70.0	0.125	1.0	58.92255892255893	250.42302750611591	108.66056120510584	105.9331865662204	232.39179417917717	2.4794870148663923	0.014540649109070122	105.83332967017563	332.27815927791664	-332.27815927791835	-332.2781592779188	149.04559571083198	164.04559571083198	35.88604120201515	35.88604120201515	['Hover-Continuous-Mix', 'Continuous', 'Hover-Continuous-Mix', 'Unclassified']	38.059709943013424	0.13430799220272904	2.3006475504402584	4.592519893204167	2.0	True	0.9414458884608972	0.08	0.7407407407407407	106.73601866954724	437.3680195985711	-448.5755150251898	-448.5755150251903	149.9482847102037	[164.94828471]	35.88604120201515	0.01	0.08800000000000001	10.0	60.0	0.08333333333333333	68.18181818181817
cor	1	4	113	0 days 01:29:32.396205532	0 days 01:29:32.538872188	0.142666656	True	10.0	161.0	0.4768421052631578	2.0	103.0729833546735	251.90053473513382	108.3	105.93318656622036	232.39179417917717	0.8868015036754536	-0.002755019964875431	34.897003710707175	1000.9768519885312	-329.49362371176426	699.8200632934422	86.2390577436026	152.62122747920216	139.3710101181165	99.3744489876688	['Unclassified', 'Hover-Continuous-Mix', 'Continuous', 'Hover-Continuous-Mix']	42.76903401515431	0.15092661230541146	2.9242180672252265	5.2174118889717205	4.0	True	0.9874874972081948	0.124	0.8732394366197183	34.37618606102149	355.6581549899652	349.9909903884874	74.09251300343395	88.11857732187221	[151.65700322]	42.056655410423105	0.016	0.138	10.0	150.0	0.4736842105263158	109.97067448680352
cor	1	4	114	0 days 01:29:33.218872138	0 days 01:29:33.333538796	0.114666658	True	11.0	93.0	0.3125	1.5	72.88401253918497	251.93999999999997	108.3	105.93318656622036	232.39179417917717	0.08040582416257999	-0.00047940970512956544	21.115509312093664	348.6051065677143	298.80437705804025	298.80437705804013	127.04869587831402	253.50730349127087	40.43819236185465	34.66130773873266	['Unclassified', 'Hover-Continuous-Mix', 'Continuous', 'Hover-Continuous-Mix', 'Unclassified']	83.72717132551415	0.29546279491833033	3.7646750553461783	6.688963412139223	3.0	True	0.904929760915044	0.064	0.5517241379310345	20.219096180919546	463.798807297736	473.88506674048574	473.8850667404854	126.15228274713988	[252.61089036]	28.884423115610556	0.026000000000000002	0.08800000000000001	10.0	50.0	0.0	71.02272727272728
cor	1	4	115	0 days 01:29:36.408205237	0 days 01:29:36.444205234	0.035999997	True	10.0	30.0	0.0	1.0	75.75757575757576	251.93726450914204	108.3	105.93318656622033	232.39179417917725	2.002365790065165	0.2749917444286136	12.829279198418567	0.0	-5.052748343182935e-14	-2.0210993372731735e-13	93.10390736780178	219.56251498075864	0.0	0.0	['Hover-Continuous-Mix', 'Unclassified']	115.17343284641943	0.4064327485380117	2.044047327883602	3.519599254036935	1.0	False	0.5621326026528758	0.0	0.0
cor	1	4	116	0 days 01:29:39.698871661	0 days 01:29:39.758871656	0.059999995	False	9.0	19.0	0.75	0.0	28.78787878787879	247.8818225566468	122.04067583474102	110.40514868567055	236.8637562986274	2.740361811368503	0.09318255675196953	5.252460329464199	312.9145837524483	315.1476454288877	312.9145837524481	115.65760901513477	242.1162166280916	46.21507698497698	17.3306538693663	['Unclassified']	213.27799722783	0.7526315789473685	1.6171706172180782	3.817427153600341	1.0	False	0.3247267292872487	0.0	0.0
cor	1	4	117	0 days 01:29:43.310871395	0 days 01:29:43.388871389	0.077999994	True	10.0	72.0	0.5	1.0	83.91608391608392	252.15883508691013	110.42387875503674	105.93318656622033	232.39179417917717	0.6889275873171348	-0.6806478746662711	29.300107194770664	1111.4971207114024	960.2191964883012	631.2633196061727	89.3649395002055	191.4217814489661	95.51354445273827	49.23853892928164	['Unclassified', 'Hover-Continuous-Mix', 'Unclassified']	120.76957418782264	0.4261808367071525	2.882057611993786	4.7816376487658125	1.0	False	0.6715043352481994	0.0	0.0
cor	1	4	118	0 days 01:29:44.164871332	0 days 01:29:44.207537995	0.042666663	True	11.0	51.0	0.5	2.0	105.37190082644628	253.04505433428972	110.60598402437752	105.4080578698085	231.86666548276528	0.8339218066297641	-1.0714451517314798	6.602248636046372	0.0	-1.0842532757536154	-1.6536267304962332e-13	98.80580923376209	225.26441684671886	0.0	0.0	['Hover-Continuous-Mix', 'Unclassified']	58.57348684197238	0.20669856459330144	3.526226847038429	6.437931165166226	1.0	False	0.4846203940403266	0.0	0.0
cor	1	4	119	0 days 01:29:44.252204659	0 days 01:29:44.303537988	0.051333329	True	10.0	78.0	0.6	2.0	136.36363636363637	253.1137637530329	110.58106138802805	105.34037712005905	231.79898473301586	0.9229958157967456	-1.1516931989796408	50.993171747619655	159.67516524474027	-53.56943004281384	-53.22505508158023	94.79824723443741	109.79824723443741	8.303108592726502	2.7677028642421675	['Unclassified', 'Hover-Continuous-Mix']	46.34981757936703	0.16356275303643725	1.827374622418093	2.8201089930487817	1.0	False	0.7974093771887605	0.0	0.0
cor	1	4	120	0 days 01:29:44.332871320	0 days 01:29:44.375537983	0.042666663	True	9.0	40.0	0.5	2.0	82.64462809917356	253.0892401541304	110.58000000531008	105.36492347193891	231.8235310848957	1.1329071209755848	-1.223530702693603	38.34047770734142	62.90233782368556	-62.21746748642409	-62.90233782368622	82.12100684227931	97.1210068422793	2.7677028642421675	2.7677028642421675	['Hover-Continuous-Mix', 'Unclassified']	92.74135416645625	0.3272727272727273	2.134675501476126	3.75277781973692	1.0	False	0.7864272465606741	0.0	0.0
cor	1	4	121	0 days 01:29:50.414870872	0 days 01:29:50.512204198	0.097333326	True	9.0	69.0	0.2	1.0	64.0074211502783	257.64	107.15999999999998	100.95158084771307	227.41018846066999	0.0006980830881949408	-0.7984038072000991	14.197381126466489	1373.1400849962138	1344.0487489452973	-1344.048748945297	86.75419972124656	210.6320194237349	97.31435470769341	91.61245284173306	['Unclassified', 'Hover-Continuous-Mix', 'Unclassified']	108.66311547072256	0.3834586466165413	3.3370567386021097	7.968083615848383	2.0	False	0.6578637825140946	0.0	0.0
cor	1	4	122	0 days 01:29:52.618870709	0 days 01:29:52.806204029	0.18733332000000005	True	11.0	182.0	0.3	2.0	88.00773694390716	258.78148730533957	107.15905902519908	99.81100595740185	226.2696135703588	0.3990287256483213	-1.505718926696992	36.62491596269092	831.8017245438377	-142.835617903201	142.79883760232616	63.18608999471098	115.65295911072498	156.37872421422873	26.84618146923734	['Unclassified', 'Hover-Continuous-Mix', 'Continuous']	53.34329911322456	0.18824188129899214	2.8614284754244097	6.546351499793893	3.0	True	0.9954380536128016	0.15	0.7978723404255319	36.87648663964497	431.77514248334734	431.8044571118746	-431.77514248330476	62.935905820866616	[106.77488979]	64.76627137249568	0.038	0.18600000000000003	11.0	163.0	0.3205128205128205	98.78787878787878
cor	1	4	123	0 days 01:29:53.404203985	0 days 01:29:53.464203980	0.059999995	True	9.0	52.0	0.6666666666666666	1.0	78.78787878787878	258.7799999999999	107.15999999999998	99.81245527350893	226.27106288646584	0.01882483507373224	-2.7971245134629896	108.63980492339756	49.8417238916875	-49.84172389168877	-49.84172389168718	157.97280225676545	172.97280225676545	2.990503433501232	2.990503433501232	['Hover-Continuous-Mix', 'Unclassified', 'Hover-Continuous-Mix', 'Unclassified']	124.9838892845605	0.44105263157894736	2.8613224282993195	7.1024210457117976	2.0	False	0.5650096080295655	0.0	0.0
cor	1	4	124	0 days 01:29:55.064203862	0 days 01:29:55.124203858	0.059999996000000014	True	10.0	49.0	0.2	1.5	74.24242424242425	256.9190653030476	106.35085806201816	101.70364841650564	228.16225602946255	3.739335044223557	-11.255993903200332	8.599741048703846	0.0	7.626816118695217	-1.2126596023639046e-13	93.10390736780174	219.56251498075858	0.0	0.0	['Hover']	12.130496812025767	0.042807017543859634	1.5212908703443906	3.4952316416053404	1.0	False	0.16761220657767872	0.0	0.0
cor	1	4	125	0 days 01:30:01.372870064	0 days 01:30:01.582870049	0.209999985	True	11.0	112.0	0.125	1.0	48.48484848484848	305.3879985893757	125.1025556490467	96.6344368093318	111.6344368093318	2.9115028866243566	5.144420143443743	44.221293413774006	412.97428367398214	-29.973039984495692	-28.480985080964693	140.85573022310578	155.85573022310575	95.6961098720403	5.981006867002519	['Hover-Continuous-Mix', 'Continuous']	27.95411911717412	0.0986466165413534	1.4475696011628874	2.975396076726495	2.0	True	0.9202479552187376	0.168	0.8	43.848961429912656	498.61064532304465	-18.685182221879106	-17.800615675603048	140.52107864840445	[155.52107865]	92.70560643853906	0.042	0.20800000000000002	11.0	95.0	0.125	51.4069264069264
cor	1	4	126	0 days 01:30:20.682868642	0 days 01:30:20.820868632	0.13799999000000002	True	11.0	185.0	0.5	2.0	121.87088274044795	310.9443218484556	171.00676633429853	152.92313579307122	167.92313579307122	2.9493139730482563	-4.259172107172459	62.91112275841096	784.9687795645527	785.4400735310405	-784.9687795645532	90.01201303466026	100.01201303466023	108.32569157990831	108.32569157990831	['Unclassified', 'Fragmented-Continuous-Mix', 'Continuous']	52.39544595928445	0.1848970251716248	2.8196892448949344	5.727558864254703	2.0	True	0.9899261799229068	0.10800000000000001	0.7826086956521741	76.2588459860132	798.8486503909949	809.6173906988788	-809.1867365314771	76.67198534981854	[85.28309646]	87.39216754539949	0.03	0.136	11.0	154.0	0.5523809523809524	129.62962962962962
cor	1	4	127	0 days 01:30:31.068867877	0 days 01:30:31.168867870	0.099999993	True	10.0	125.0	0.4583333333333334	2.0	113.63636363636364	305.7063402126603	112.94020277707622	96.41280354185696	111.41280354185696	0.9208933604387792	-4.4234770715092955	40.82342526731517	1478.0606704653171	1008.4583542238272	1007.3931280811826	80.01366723562926	133.12628243307117	147.80606704651868	100.7393128081184	['Continuous', 'Hover-Continuous-Mix', 'Unclassified']	64.01322825887037	0.2258947368421053	3.3414975153227484	6.569981879049967	2.0	True	0.8855463939945105	0.062	0.62	28.766486529039263	376.9143527928366	148.5367834405009	-285.4760828077832	73.1460161170281	[138.41497489]	23.401419000042768	0.0	0.06	10.0	96.0	0.6188811188811189	140.76246334310855
cor	1	4	128	0 days 01:30:31.730867828	0 days 01:30:31.852867819	0.121999991	True	11.0	118.0	0.3076923076923077	2.0	87.9284649776453	307.5972542904758	113.49606508542578	98.32651968400327	113.32651968400327	1.415758227332789	-4.22546886258543	7.246242399459126	255.93879917271	19.645751625993636	-255.9387991727094	100.29883103726038	115.29883103726036	31.224533499070606	31.22453349907055	['Continuous']	24.303373752661113	0.08576358930112167	2.171141930641844	7.8715709232202755	3.0	True	0.9903805099776928	0.122	1.0	7.246242399459126	255.93879917271	19.645751625993636	-255.9387991727094	100.29883103726038	[115.29883104]	31.224533499070606	0.0	0.12	11.0	118.0	0.3076923076923077	87.9284649776453
cor	1	4	129	0 days 01:30:31.896867816	0 days 01:30:31.962201144	0.06533332800000001	True	10.0	72.0	0.4017857142857143	2.0	99.17355371900827	307.704243999794	113.33283559998823	98.42616128872369	113.42616128872369	1.4720458200928674	-4.338888284473668	31.10654789580493	542.0595575372691	-149.4718203293745	-23.49011469076832	81.31519070026756	151.65624939824403	37.33336438310084	2.975823036080812	['Continuous', 'Unclassified', 'Fragmented-Continuous-Mix']	76.9228970717878	0.271451355661882	5.09431376656627	11.568569061509907	1.0	True	0.9189640657636566	0.05	0.7575757575757576	33.62941792378455	602.0667911552218	-84.32077418216544	-143.86712784045372	83.27288369690349	[174.32308118]	31.69035556066889	0.0	0.048	10.0	69.0	0.4017857142857143	125.45454545454544
cor	1	4	130	0 days 01:30:32.811534415	0 days 01:30:32.861534411	0.049999996000000005	True	7.0	39.0	0.2	2.0	70.9090909090909	306.25454889494574	116.30401581008567	97.10972959055329	112.10972959055329	2.1387538931847656	-5.811757159231093	5.654015815239132	110.70811456968659	-0.2193516751987008	-1.4551915228366852e-13	91.45571377531417	106.45571377531418	5.535405728484335	0.0	['Continuous']	27.80071236592133	0.09810526315789474	1.7657499245669142	2.9089902908649954	1.0	True	0.8776318771766755	0.05	1.0	5.654015815239132	110.70811456968659	-0.2193516751987008	-1.4551915228366852e-13	91.45571377531417	[106.45571378]	5.535405728484335	0.0	0.048	7.0	39.0	0.2	70.9090909090909
cor	1	4	131	0 days 01:30:35.172200908	0 days 01:30:35.306867565	0.134666657	True	11.0	117.0	0.375	2.0	79.37584803256445	299.60463764173517	112.4957566426278	90.29738980316144	105.29738980316144	1.3735836558029406	-7.3587041253434	26.961020333973885	285.9929125133356	267.1245335471139	-264.7171592821401	63.71933302734699	83.3928773335651	35.55534741253205	35.472099343806775	['Hover-Continuous-Mix', 'Continuous']	32.277747205965284	0.11390416339355852	2.840969511156075	6.512285332920122	4.0	True	0.9621144009349932	0.122	0.9104477611940298	28.490253102090634	313.8744462212609	293.1740155568422	-290.7549126541538	62.24343654481059	[82.37667373]	35.55534741253205	0.012	0.132	10.0	110.0	0.375	81.96721311475409
cor	1	4	132	0 days 01:30:37.317534083	0 days 01:30:37.366867413	0.04933333	True	9.0	43.0	0.625	1.0	81.43939393939394	293.35186470588815	115.10512643766704	84.16655676051961	99.1665567605196	1.896749806181916	-4.9475072628286645	65.77195093900514	372.8636315171853	372.4480875737429	-372.8636315171856	18.394605821514478	18.394605821514467	17.897454312824898	17.897454312824898	['Continuous', 'Hover-Continuous-Mix']	24.981863311651413	0.0881578947368421	2.047330619652166	4.344287155152658	1.0	True	0.9446793207528827	0.032	0.6666666666666666	63.290533773849866	559.2904572012542	559.1784608980154	-559.2954472757783	20.880363364962374	[20.88036336]	17.897454312824898	0.0	0.03	8.0	29.0	0.6	82.38636363636363
cor	1	4	133	0 days 01:30:37.801534048	0 days 01:30:37.894867374	0.093333326	True	11.0	69.0	0.2222222222222222	1.5	68.18181818181817	292.3918405501257	116.50832611439148	83.26974014950893	98.26974014950895	1.7387443013452455	-3.9794581849093587	29.64222305999375	324.2292447975523	323.12852419501166	-324.22924479755227	53.62751708951517	53.62751708951517	29.829090521374827	29.829090521374827	['Hover-Continuous-Mix', 'Continuous']	27.429794109872926	0.0967963386727689	1.5049179685820435	3.7192795160293226	1.0	True	0.9923111521676716	0.07200000000000001	0.7826086956521741	31.886854210298004	372.8636315171852	371.7242568135545	-372.86363151718535	51.37232256458999	[51.37232256]	26.846181469237372	0.02	0.09	11.0	57.0	0.225	71.96969696969697
cor	1	4	134	0 days 01:30:38.584200657	0 days 01:30:38.647533985	0.06333332800000001	True	10.0	60.0	0.3666666666666667	2.0	85.22727272727272	292.2244176387288	116.93608932960731	83.12146261113308	98.1214626111331	0.4627770923465362	-2.6093053313105408	41.826815420604824	442.7755624266575	443.04010648837294	-442.7755624266574	41.294647190528266	41.29464719052827	26.84618146923734	26.84618146923734	['Continuous']	25.541158758927182	0.09013157894736842	2.0286389407157985	4.490464842582881	1.0	True	0.9671599968563216	0.064	1.0	41.826815420604824	442.7755624266575	443.04010648837294	-442.7755624266574	41.294647190528266	[41.29464719]	26.84618146923734	0.0	0.062	10.0	60.0	0.3666666666666667	85.22727272727272
cor	1	4	135	0 days 01:30:39.466200592	0 days 01:30:39.554867252	0.08866666000000001	True	11.0	76.0	0.3333333333333333	1.5	78.51239669421487	291.73868597965753	116.39907420122739	82.6123812029175	97.6123812029175	0.4280442725012365	-1.4789990319138917	36.85184460762656	983.0041194543976	-372.90657054821196	372.8636315171856	45.76053659529093	45.76053659529094	86.50436251198704	32.8119995735123	['Unclassified', 'Hover-Continuous-Mix', 'Continuous']	87.79243687540999	0.3098086124401914	2.5701759790418457	7.708861524729813	1.0	True	0.8926168771377389	0.054000000000000006	0.6136363636363636	36.37576371584849	390.16660313151465	386.67849682747834	-386.67339564745134	46.23509030813098	[46.23509031]	20.880363364962406	0.034	0.086	10.0	60.0	0.5	101.010101010101
cor	1	4	136	0 days 01:30:39.717533906	0 days 01:30:39.763533903	0.045999997	True	9.0	29.0	0.3333333333333333	1.0	57.31225296442688	291.8023103449644	116.29352734380078	82.67125963651236	97.67125963651236	0.6269567363646497	-1.2808988310599445	1.7809507081747378	60.16745357048185	58.15515225356224	-60.167453570482635	80.89030892833762	95.89030892833763	2.7677028642421675	2.7677028642421675	['Hover-Continuous-Mix', 'Unclassified']	146.68131034641272	0.5176201372997711	1.7732796269594042	3.2859660374591666	1.0	False	0.3896591103022228	0.0	0.0
cor	1	4	137	0 days 01:30:40.429533854	0 days 01:30:40.528867180	0.099333326	True	10.0	108.0	0.5	2.0	100.18552875695732	290.70755143079333	117.29187264131481	81.62187698713899	96.62187698713896	0.7677290297983973	-0.9128288984575876	21.059738965692915	339.5590473364178	188.77984474948474	186.98234154553685	102.68161595283188	117.68161595283188	34.883438640349226	16.94041803934161	['Unclassified', 'Hover-Continuous-Mix', 'Continuous', 'Hover-Continuous-Mix']	43.8913760528801	0.15488721804511274	2.8917818119593455	8.317029056558681	1.0	True	0.8630322491449309	0.066	0.6734693877551021	23.151732379844805	333.9410598692809	242.2186492347623	240.7692039561989	104.75924434270493	[119.75924434]	20.37652261136111	0.02	0.084	10.0	91.0	0.5	125.34435261707986
cor	1	4	138	0 days 01:30:40.533533846	0 days 01:30:40.596200508	0.062666662	True	11.0	64.0	0.4	2.0	93.84164222873899	290.6375637428405	117.37330384916784	81.5555714515378	96.5555714515378	0.6326789229528984	-0.8960707962852292	45.57383020157154	3626.841821130508	885.3324889449078	-1697.4847672587343	106.46819562975584	119.5327117587881	230.84519977709468	105.24405557004174	['Hover-Continuous-Mix', 'Unclassified', 'Fragmented-Continuous-Mix', 'Unclassified']	151.551024423114	0.534804753820034	1.8858684698076964	3.7587296849481855	1.0	False	0.7436710244685679	0.0	0.0
cor	1	4	139	0 days 01:30:42.039533735	0 days 01:30:42.088200398	0.048666663000000006	True	10.0	45.0	0.4142857142857143	2.0	85.22727272727272	291.7780361929669	116.27999999999996	82.64640916408742	97.64640916408742	0.5773087807841024	-1.3494091850461132	12.548046438856554	0.0	0.8471081907067667	0.0	70.09836272523083	70.09836272523084	0.0	0.0	['Hover-Continuous-Mix', 'Unclassified']	64.87827188399022	0.22894736842105265	1.6944070977419754	2.6437683285152973	1.0	False	0.3253052804161201	0.0	0.0
cor	1	4	140	0 days 01:30:44.424866893	0 days 01:30:44.487533555	0.062666662	True	10.0	45.0	0.125	1.0	63.92045454545455	288.61016417316034	116.27999999999996	79.48165717589994	94.48165717589994	1.2937323904409586	-0.7308393092115839	23.365680632563528	233.0397696982408	234.42265829166797	-233.0397696982422	56.1159765433364	56.11597654333641	14.914545260687447	14.914545260687447	['Hover-Continuous-Mix', 'Continuous', 'Hover-Continuous-Mix', 'Unclassified']	26.659749653478737	0.09407894736842104	1.447948108979173	3.9398528949565566	1.0	True	0.8159523659032267	0.022000000000000002	0.34375	27.029471189340573	361.90148467568014	340.2749207430361	-338.9669377428983	52.47208196260026	[52.47208196]	8.948727156412476	0.036000000000000004	0.055999999999999994	7.0	11.0	0.25	45.45454545454545
cor	1	4	141	0 days 01:30:44.638200211	0 days 01:30:44.706866872	0.06866666099999999	True	10.0	74.0	0.4097222222222222	2.0	98.9304812834225	289.2052599193743	116.39688891886831	80.08135334536671	95.08135334536672	2.3504177404615905	-0.5005071163570479	27.52951445623871	1359.8555972979705	-480.1883630883409	482.5294054928283	52.551838889128	52.55183888912801	92.47018061626194	32.8119995735123	['Unclassified', 'Fragmented-Continuous-Mix', 'Continuous']	81.50360321869765	0.28761609907120744	2.258826859982182	4.021407964286179	2.0	True	0.9814992304585703	0.044000000000000004	0.6470588235294118	27.50172339847575	531.4115732426357	544.5120930731974	-542.3471003886331	52.60766873769742	[52.60766874]	23.863272417099857	0.024	0.066	10.0	47.0	0.3333333333333333	97.10743801652893
cor	1	4	142	0 days 01:30:45.607533473	0 days 01:30:45.700200132	0.092666659	True	11.0	70.0	0.14285714285714285	1.0	69.1699604743083	290.87525229376416	111.53422365491168	81.53393738885703	96.53393738885704	3.5036387109689824	0.4755398001697934	2.8096567890567483	0.0	5.925358651857753	0.0	78.72428059980028	93.72428059980028	0.0	0.0	['Hover']	13.163707338780627	0.04645308924485126	1.1522401670206532	2.8875244995535576	1.0	False	0.1277970380087223	0.0	0.0
cor	1	4	143	0 days 01:30:45.737533463	0 days 01:30:45.804866791	0.067333328	True	11.0	53.0	0.14285714285714285	2.0	73.00275482093664	291.4068320233495	110.96231300964122	82.03961705604861	97.0396170560486	2.92465490172896	0.5844283633277573	7.056060316894563	235.6872428527869	238.00701659835582	109.88256720532036	78.43925483973143	127.2145904800214	11.362179697545374	5.826773969061037	['Hover-Continuous-Mix', 'Continuous']	29.377134604384285	0.1036682615629984	1.8005231195915532	3.5092242827317746	1.0	True	0.8841329612305838	0.026000000000000002	0.3939393939393939	11.578111447363947	489.4442063300343	493.4809270717057	385.38278076128114	79.27815499235265	[180.01554546]	8.594476833303204	0.04	0.064	8.0	22.0	0.25	76.92307692307693
cor	1	4	144	0 days 01:30:46.014866776	0 days 01:30:46.046200107	0.031333331	True	8.0	25.0	0.5	1.0	71.02272727272728	290.9551848788512	109.99055400964752	81.5452963722216	96.54529637222159	1.6608963414557438	0.8325714063786016	10.513252379121072	412.365844816204	268.88554245792733	-274.6038286090911	71.38841285972111	88.13323881134073	35.42338929336189	5.858215010327271	['Continuous']	43.06574944023489	0.15197368421052632	2.294805199623334	4.319289883861414	1.0	True	0.8711587032175296	0.032	1.0	10.513252379121072	412.365844816204	268.88554245792733	-274.6038286090911	71.38841285972111	[88.13323881]	35.42338929336189	0.0	0.03	8.0	25.0	0.5	71.02272727272728
cor	1	4	145	0 days 01:30:47.431533338	0 days 01:30:47.520199998	0.08866666000000001	True	11.0	91.0	0.4	2.0	94.00826446280992	290.1151033475757	110.25242661947951	80.71766190586905	95.71766190586905	0.6579491754031926	3.0198839097432413	25.583237418196827	32.3971696929565	30.43553903105051	32.39716969295668	94.01102811920454	220.46963573216132	2.8509509329801834	2.8509509329801834	['Unclassified', 'Hover-Continuous-Mix', 'Unclassified']	65.35282559683027	0.230622009569378	2.189510194048246	6.1396430329697536	1.0	False	0.5647387732706436	0.0	0.0
cor	1	4	146	0 days 01:30:54.168199509	0 days 01:30:54.251532836	0.083333327	True	10.0	76.0	0.3636363636363637	1.5	82.25108225108225	289.60766150729773	114.53245888693607	80.40063112567266	95.40063112567266	0.7846185215228374	-3.891629148156994	16.981578675995824	422.2868969500811	421.89641621085184	-422.28689695008035	63.41905244967682	67.34762387824826	41.0075050722911	35.472099343806775	['Unclassified', 'Hover-Continuous-Mix', 'Continuous']	59.09000788996154	0.20852130325814536	2.886692637415969	10.5695715514982	1.0	True	0.9179475541587724	0.066	0.7857142857142857	21.069657020458425	513.1915201522278	515.9578260377332	-516.4886047225101	59.3287691015899	[60.23786001]	38.23980220804894	0.018000000000000002	0.08199999999999999	9.0	65.0	0.4222222222222222	89.53168044077135
cor	1	4	147	0 days 01:30:54.500866151	0 days 01:30:54.647532807	0.146666656	True	11.0	107.0	0.2307692307692308	1.0	65.72481572481573	289.56000000000006	115.23904192223293	80.38436868115362	95.38436868115362	0.6259327962786525	-2.871057259263819	36.0438287169478	513.947167766931	-110.91670160688471	110.85134991051432	44.340539964205824	44.340539964205824	74.57272630343712	14.914545260687413	['Continuous', 'Hover-Continuous-Mix', 'Fragmented-Continuous-Mix', 'Continuous']	48.93583228776895	0.17268847795163586	3.090018557087642	10.416950304661954	2.0	True	0.9952856591251108	0.134	0.9054054054054054	34.059883671164165	501.7820022823188	-55.722567946425315	55.65128828614685	46.324132369388806	[18.39460582 47.63332893]	65.62399914702468	0.0	0.146	11.0	100.0	0.18181818181818185	67.84260515603799
cor	1	4	148	0 days 01:30:56.855532644	0 days 01:30:56.935532638	0.079999994	True	8.0	41.0	0.0	1.0	46.59090909090909	289.55999999999983	113.99999999999993	80.32939058178916	95.32939058178916	0.0008543102931130711	-0.09217605856406408	78.83793605572039	0.0	-8.185452315956354e-13	0.0	1.491454526068741	1.491454526068741	0.0	0.0	['Hover']	7.606418082950578	0.0268421052631579	1.349498151338177	2.5703805608969605	1.0	False	0.09314706712330366	0.0	0.0
cor	1	4	149	0 days 01:30:58.635532513	0 days 01:30:58.792865835	0.157333322	True	11.0	173.0	0.5	2.0	100.81585081585081	289.5600000000001	114.0	80.32939058178927	95.32939058178927	7.281743843428498e-13	0.0035658958501891477	49.29779558470662	1114.8348349739804	66.46638180850627	1077.2091517536423	119.51975846704453	133.55822000550606	179.7838408383141	168.0446276735682	['Unclassified', 'Hover-Continuous-Mix', 'Unclassified', 'Fragmented-Continuous-Mix', 'Unclassified', 'Hover-Continuous-Mix']	92.96733212495151	0.3280701754385965	4.881317602713773	14.129297667796584	2.0	False	0.7669121821533091	0.0	0.0
cor	1	4	150	0 days 01:30:59.476865784	0 days 01:30:59.606865775	0.129999991	True	11.0	88.0	0.4807692307692308	1.0	61.53846153846154	289.56000000000006	114.0	80.32939058178938	95.3293905817894	5.239664203584947e-13	0.0189557971882419	21.01916341069085	385.9341416661454	364.64411963351125	-364.6441196335127	59.31022717109851	62.54099640186775	52.939141280841035	47.4037355523567	['Unclassified', 'Hover-Continuous-Mix', 'Continuous']	63.83425371574211	0.22526315789473686	1.7621543676857698	3.9030015236181694	3.0	True	0.9747898990048997	0.092	0.7076923076923077	27.6745612266668	391.1959101381036	389.07509375706	-389.07509375706223	52.65482935512251	[52.65482936]	35.79490862564979	0.038	0.128	10.0	70.0	0.4166666666666666	69.1699604743083
cor	1	4	151	0 days 01:30:59.810199093	0 days 01:30:59.919532418	0.109333325	True	11.0	92.0	0.3636363636363637	1.0	76.03305785123965	289.55999999999983	113.99999999999993	80.32939058178911	95.32939058178913	0.0	0.03083346261948092	44.91566578321585	1821.1873752850888	1.6536267304962332e-13	-7.275957614183427e-13	55.26671038640777	131.14187495418193	200.33061128134707	0.0	['Unclassified', 'Hover-Continuous-Mix', 'Unclassified']	163.02953837682313	0.5753110047846891	1.7596793736695842	6.6238198565787	1.0	False	0.5635353510155093	0.0	0.0
cor	1	4	152	0 days 01:31:00.998865672	0 days 01:31:01.171532326	0.17266665399999997	True	11.0	155.0	0.2307692307692308	1.0	80.98223615464994	289.56000000000006	114.0	80.32939058178927	95.32939058178928	0.0	0.12840402085478492	28.048792230453067	902.8478522525787	-77.34060603882583	-77.34060603882583	108.37818281224236	123.37818281224236	220.7229484044487	14.952517167506327	['Unclassified', 'Hover-Continuous-Mix', 'Continuous', 'Hover-Continuous-Mix', 'Unclassified']	112.83624931706268	0.39818511796733214	2.097205268042539	6.657937570621439	2.0	True	0.8467327642800706	0.04	0.2298850574712644	17.215269494857626	223.04114659934467	207.57771481816303	207.57771481816272	97.54466007664692	[112.54466008]	8.303108592726486	0.07	0.10800000000000001	10.0	56.0	0.42857142857142855	127.27272727272728
cor	1	4	153	0 days 01:31:01.989532266	0 days 01:31:02.050198928	0.060666662	True	11.0	65.0	0.3333333333333333	2.0	98.48484848484848	289.56000000000006	113.99999999999996	80.3293905817893	95.32939058178928	5.780584588230733e-05	0.1318185614771039	40.39069249422758	48.140705192684365	-48.14070519268414	-48.14070519268425	109.20675451931507	235.66536213227184	2.8884423115610502	2.8884423115610502	['Unclassified', 'Hover-Continuous-Mix', 'Unclassified']	74.27443539822329	0.2621052631578948	1.375867693332563	3.789698785164203	1.0	False	0.6717134472209066	0.0	0.0
cor	1	4	154	0 days 01:31:02.327532241	0 days 01:31:02.421532234	0.093999993	True	10.0	40.0	0.25	1.0	38.684719535783366	289.5599999999999	114.0	80.3293905817893	95.3293905817893	0.01663797050281041	0.032806006804385536	58.65570034125844	825.0599505912186	-729.8607255230015	729.8607255230002	21.673690240530853	21.673690240530853	80.53854440771201	68.60690819916209	['Hover-Continuous-Mix', 'Unclassified']	182.4651813807502	0.6438969764837625	1.1348897687586823	2.6487834885616457	1.0	False	0.4099253479118258	0.0	0.0
cor	1	4	155	0 days 01:31:03.819532131	0 days 01:31:03.924198790	0.104666659	True	11.0	92.0	0.3888888888888888	2.0	80.4195804195804	290.57523302291196	113.35080501704105	81.31481797410834	96.31481797410835	0.9194261371894914	-1.6439666217909104	15.250533354553523	1017.1698870858943	989.9509564624417	-988.4880692768851	66.06428461955483	68.66043846570871	80.43094131376431	74.46512320948935	['Hover-Continuous-Mix', 'Unclassified']	62.18218100994289	0.2194331983805668	1.9501439370728737	3.8754929484944185	3.0	False	0.7450580645291234	0.0	0.0
cor	1	4	156	0 days 01:31:04.284198763	0 days 01:31:04.368198757	0.08399999400000001	True	10.0	79.0	0.35416666666666663	1.5	85.49783549783551	290.71975735898127	113.59761132507666	81.47015112469069	96.47015112469069	0.2156397219441633	-2.451403933303961	20.172498380574623	1215.9779982370355	754.1920089476712	-1150.080310993173	94.02506090347354	108.31077518918785	102.14215185191105	96.60674612342665	['Unclassified', 'Hover-Continuous-Mix', 'Unclassified']	105.11203326579698	0.3709273182957393	2.22137307061727	6.5794340240906575	1.0	False	0.6646958453800099	0.0	0.0
cor	1	4	157	0 days 01:31:06.241531953	0 days 01:31:06.288198616	0.046666663	True	9.0	25.0	0.25	1.0	49.40711462450593	281.69023348451014	110.54696077813016	76.78716206279368	203.24576967575047	3.665058283424429	-3.654791487784152	0.7889602928729486	0.0	7.271743154703086	-3.1634598322536633e-13	75.99820176992075	202.45680938287757	0.0	0.0	['Hover-Continuous-Mix']	28.013406750508533	0.09885583524027458	1.4348398722012865	2.42072833434689	0.0	False	0.37959771826696703	0.0	0.0
cor	1	4	158	0 days 01:31:06.941531901	0 days 01:31:06.976865232	0.035333331	True	9.0	24.0	0.0	1.0	64.17112299465239	282.7547920443926	112.7939653148347	75.63542775482081	202.09403536777768	0.9695327965807116	-3.2627084562193436	2.4465528835021413	0.0	-3.2614850812634337	-4.2799750671667216e-13	75.95657773555808	90.95657773555813	0.0	0.0	['Hover-Continuous-Mix']	23.5123419403778	0.08297213622291022	2.03237634274241	3.779543975246869	1.0	False	0.21039133840810875	0.0	0.0
cor	1	4	159	0 days 01:31:10.628198296	0 days 01:31:10.701531624	0.073333328	True	10.0	44.0	0.0	1.0	54.05405405405406	283.81275485149456	126.55940918668469	67.12431171832645	67.12431171832645	1.8022501630821648	-6.5879182690766465	8.832266017231627	0.0	-0.2704449057407377	-3.886860803184992e-13	75.95657773555811	90.95657773555814	2.700062395888381e-13	1.4210854715202004e-14	['Hover-Continuous-Mix']	41.4382500756396	0.14623044096728308	1.5227277947700681	4.711285720259777	1.0	False	0.4429526948133469	0.0	0.0
cor	1	4	160	0 days 01:31:11.551531562	0 days 01:31:11.690198218	0.138666656	True	11.0	140.0	0.375	2.0	92.2266139657444	283.25162138131697	126.540375280892	67.11905475171821	67.11905475171821	0.6342745762312781	-3.9293384746133846	20.149044822046122	313.4216033043007	270.07676599946046	-270.19103733129367	46.97000992967211	46.970009929672116	41.76072672992478	35.79490862564982	['Continuous']	25.76541731991216	0.09092295957284516	1.6173642423780803	4.475150397729388	2.0	True	0.9882383166475108	0.138	1.0	20.149044822046122	313.4216033043007	270.07676599946046	-270.19103733129367	46.97000992967211	[46.97000993]	41.76072672992478	0.0	0.136	11.0	140.0	0.375	92.2266139657444
cor	1	4	161	0 days 01:31:12.115531520	0 days 01:31:12.146198184	0.030666664000000007	True	10.0	29.0	0.3333333333333333	2.0	87.87878787878788	282.7046160081344	126.53999996695427	67.09576780001092	67.09576780001092	0.7229390421894794	-2.4821105012222238	14.39621566403152	0.0	-0.0556100439690321	-9.701276818911234e-13	81.49198346404243	96.49198346404243	1.2789769243681806e-13	1.4210854715202004e-14	['Hover-Continuous-Mix', 'Unclassified']	52.10147811066801	0.18385964912280706	2.059070098435543	3.4213231796665022	1.0	False	0.395078296293637	0.0	0.0
cor	1	4	162	0 days 01:31:14.645531334	0 days 01:31:14.735531327	0.08999999300000001	True	11.0	147.0	0.6015037593984962	3.0	148.4848484848485	285.0192254908763	126.56864980365627	67.16726827828153	67.16726827828153	0.411281697573976	0.20000375988426336	32.14912581475736	206.7351535725877	175.4493494050624	175.0579209839191	99.31639409303891	225.77500170599566	20.012893598732923	14.310991732772179	['Unclassified', 'Hover-Continuous-Mix', 'Unclassified']	74.24129196431066	0.2619883040935673	3.656288323257944	6.2137644193908885	1.0	False	0.784514293737207	0.0	0.0
cor	1	4	163	0 days 01:31:14.992197975	0 days 01:31:15.054197970	0.061999995	True	10.0	65.0	0.4722222222222222	2.0	95.30791788856304	285.3553632950096	126.35111170842548	67.39914312751046	67.39914312751046	0.4384388025393251	0.19376538656727446	27.324357282692837	314.27936023104337	311.9757081800813	314.2793602310425	94.7235004102033	109.72350041020329	19.48532033432485	19.485320334324623	['Hover-Continuous-Mix', 'Continuous', 'Hover-Continuous-Mix', 'Unclassified']	41.856949602574346	0.14770797962648555	2.650115348936645	4.744313833367208	1.0	True	0.928236983828786	0.044000000000000004	0.7096774193548387	28.060459552338195	413.3407311728809	440.4809639166336	442.84818941646853	95.46136611020194	[110.46136611]	19.4853203343248	0.01	0.052000000000000005	10.0	59.0	0.4857142857142857	121.90082644628099
cor	1	4	164	0 days 01:31:15.842864579	0 days 01:31:15.942864571	0.099999992	True	10.0	123.0	0.4495192307692308	2.0	111.8181818181818	285.1546264662766	126.06275851248913	67.67854310536937	67.67854310536937	0.7706140124460056	0.09649731335230173	32.181925384933315	581.667265166809	582.5209705242922	-581.6672651668092	35.49661772043604	35.49661772043604	56.675271990612195	56.6752719906122	['Continuous']	23.386006968757854	0.08252631578947367	2.199348076558488	3.992315110624237	2.0	True	0.9903226458384468	0.1	1.0	32.181925384933315	581.667265166809	582.5209705242922	-581.6672651668092	35.49661772043604	[35.49661772]	56.675271990612195	0.0	0.098	10.0	123.0	0.4495192307692308	111.8181818181818
cor	1	4	165	0 days 01:31:16.192864553	0 days 01:31:16.257531215	0.064666662	True	10.0	49.0	0.3333333333333333	1.0	67.49311294765839	284.78763440863963	126.25728881105452	67.46831984856378	67.46831984856378	0.7822798897804888	0.054651920879419696	16.288147777131353	41.93489188245704	43.527307420400106	41.93489188245693	83.75646762569512	98.75646762569514	2.7677028642423807	2.7677028642421533	['Hover-Continuous-Mix', 'Unclassified']	79.00189428994422	0.27878787878787875	1.80743359392084	5.093949584727604	1.0	False	0.2943122207529693	0.0	0.0
cor	1	4	166	0 days 01:31:17.464864459	0 days 01:31:17.526864455	0.061999995999999995	True	11.0	79.0	0.6	2.0	115.8357771260997	285.03006399326995	126.23631467426121	67.49976117508318	67.49976117508318	0.7678963271369587	-0.048948515314124974	28.666169453143425	1615.569445817418	-651.8335760687564	1477.6202071247255	87.6532573349448	205.95324510190446	103.01625657365402	91.61245284173306	['Unclassified', 'Hover-Continuous-Mix', 'Unclassified']	122.49171688293598	0.43225806451612897	2.724130429543381	5.978911886315637	1.0	False	0.5870017946291525	0.0	0.0
cor	1	4	167	0 days 01:31:18.474864385	0 days 01:31:18.534864380	0.059999995	True	11.0	61.0	0.16666666666666666	2.0	92.42424242424242	282.25937024914845	125.5973979594948	68.0182274239242	68.0182274239242	0.7341659747518136	-0.17097943478816546	29.301649165792302	661.5790419790236	276.61834767727976	275.84195071896943	97.31987658971651	112.31987658971651	39.63904237642664	16.606217185452937	['Unclassified', 'Hover-Continuous-Mix']	106.78814406652188	0.3768421052631579	1.6259962546579019	3.6123152227942175	1.0	False	0.7350538714917345	0.0	0.0
cor	1	4	168	0 days 01:31:28.730196963	0 days 01:31:28.774196960	0.043999997000000006	True	9.0	29.0	0.0	1.0	59.91735537190082	280.17394826311414	192.13072491392398	1.456968184235201	1.456968184235201	2.8421323194062857	-14.534123624095333	0.03448634183354033	0.0	-1.1573457902965132	7.630260060151077e-15	1.4914545260687406	1.4914545260687406	2.886579864025407e-15	2.220446049250313e-16	['Hover']	9.491074256801078	0.03349282296650718	1.820863750670422	3.0782798306286416	1.0	False	0.14898846379817027	0.0	0.0
cor	1	4	169	0 days 01:31:31.452863429	0 days 01:31:31.517530091	0.064666662	True	10.0	75.0	0.5	2.0	103.30578512396694	281.5996462132044	194.93912727669155	0.0	0.0	0.3729674511587994	-1.0377507168338411	100.30926923968796	3879.222974685369	-1517.656146070809	-1517.656146070809	100.30926923968796	219.103718815496	256.0287163292277	100.16530564067357	['Unclassified', 'Hover-Continuous-Mix', 'Unclassified']	96.89934860276912	0.3419457735247209	3.11149011253074	5.5945652259695136	2.0	False	0.41740390682476586	0.0	0.0
cor	1	4	170	0 days 01:31:34.383529880	0 days 01:31:34.464863207	0.08133332700000001	True	10.0	48.0	0.1	1.0	54.54545454545454	281.57999999999987	194.94	0.0	0.0	0.013464163270443748	-0.004220814876519532	13.199372555708356	447.4363578206224	6.593836587853729e-13	6.593836587853729e-13	13.199372555708356	13.199372555708358	35.79490862564978	0.0	['Continuous']	28.03934509009233	0.09894736842105263	2.233338614190687	4.592639976748019	2.0	True	0.8635983669716897	0.078	0.975	13.499575582109378	458.9090849442282	6.515130315584919e-13	6.515130315584919e-13	13.499575582109378	[13.49957558]	35.79490862564978	0.002	0.078	10.0	47.0	0.1	54.778554778554785
cor	1	4	171	0 days 01:31:36.040863091	0 days 01:31:36.090863087	0.049999996000000005	False	8.0	34.0	0.5	1.0	61.81818181818182	281.2579185338102	193.92039255727767	0.0	0.0	0.040787667022371035	0.0	64.49049370721237	1431.7963450259922	1431.7963450259913	1431.7963450259913	64.49049370721237	64.49049370721237	71.58981725129958	71.58981725129958	['Unclassified']	203.19576463160527	0.7170526315789474	1.982235060111904	3.314908874323636	1.0	False	0.2040686090504804	0.0	0.0
cor	1	4	172	0 days 01:31:36.839529699	0 days 01:31:36.941529691	0.101999992	True	11.0	69.0	0.25	1.0	61.49732620320856	281.57999999999987	194.94	0.0	0.0	0.4162590763872427	0.0	20.26623503069878	321.68627032855204	263.1978575415423	263.1978575415423	20.26623503069878	20.26623503069877	32.8119995735123	26.84618146923734	['Hover-Continuous-Mix', 'Continuous']	23.92176082988686	0.0844169246646027	2.051437111736996	4.9970124623837515	2.0	True	0.9547893173014508	0.092	0.9019607843137256	22.30697204207161	356.6521692773077	291.80632031779703	291.80632031779703	22.30697204207161	[22.30697204]	32.8119995735123	0.01	0.1	10.0	67.0	0.25	66.20553359683795
cor	1	4	173	0 days 01:31:37.360196327	0 days 01:31:37.402196324	0.041999997	True	9.0	41.0	0.5714285714285714	2.0	88.74458874458875	281.5967986150924	194.93995697508396	0.0	0.0	0.3450201365207805	0.0	1.4914545260687408	0.0	0.0	0.0	1.4914545260687408	1.4914545260687408	0.0	0.0	['Hover']	5.9658181042749625	0.021052631578947368	1.5730749551335976	2.4021761968910065	0.0	False	0.053677322057105806	0.0	0.0
cor	1	4	174	0 days 01:31:38.494862910	0 days 01:31:38.607529569	0.112666659	True	11.0	82.0	0.25	1.0	65.3907496012759	281.5737973503634	194.5412394800544	0.0	0.0	0.9519842016922136	0.0	40.42626741712641	1255.9617061631504	6.37244643018532e-13	6.37244643018532e-13	40.42626741712641	40.42626741712641	143.17963450259916	0.0	['Unclassified', 'Hover-Continuous-Mix', 'Unclassified']	148.56980349154932	0.5242843951985225	1.8178959914960848	3.719564915448197	2.0	False	0.3476367621825943	0.0	0.0
cor	1	4	175	0 days 01:31:41.953529322	0 days 01:31:42.003529318	0.049999996000000005	False	9.0	43.0	0.5833333333333333	1.0	78.18181818181819	281.1581640034508	194.38562359893132	0.0	0.0	0.641207213444427	0.00011733030683033831	63.31977204506178	1932.134922468533	-1932.13492246853	-1932.13492246853	63.31977204506178	72.91977204506178	96.60674612342665	96.60674612342665	['Unclassified']	240.78041868853757	0.8496842105263158	2.2854409230688577	5.837520010154521	1.0	False	0.2512808975306797	0.0	0.0
cor	1	4	176	0 days 01:31:43.011529244	0 days 01:31:43.082862572	0.071333328	True	10.0	74.0	0.5833333333333334	2.0	96.1038961038961	280.6888462149157	194.74599614068075	0.0	0.0	0.7950042275011758	0.0006800871565898428	1.4914545260687413	0.0	0.0	0.0	1.4914545260687413	1.4914545260687413	0.0	0.0	['Hover-Continuous-Mix', 'Unclassified']	70.05574973877171	0.247218045112782	3.5675556522323437	8.026574192173799	1.0	False	0.3179507578231602	0.0	0.0
cor	1	4	177	0 days 01:31:43.305529222	0 days 01:31:43.394195883	0.08866666100000001	True	10.0	135.0	0.5916666666666667	3.0	139.46280991735537	281.1980679827623	194.2429915853847	0.0	0.0	0.5675646736611544	0.0012158734979269238	101.68573077746387	358.2860393908625	358.2860393908612	358.2860393908612	101.68573077746387	228.14433839042067	31.52917146639581	31.52917146639581	['Unclassified', 'Hover-Continuous-Mix', 'Continuous', 'Hover-Continuous-Mix', 'Unclassified']	49.28579274781704	0.17392344497607656	6.122360506546581	12.006005460237244	1.0	True	0.9469945574234712	0.066	0.75	100.3716663516458	347.1861036101931	346.70591243944017	346.70591243944017	100.3716663516458	[226.83027396]	22.86384453171267	0.008	0.07200000000000001	10.0	119.0	0.5993589743589745	163.91184573002755
cor	1	4	178	0 days 01:31:44.116862496	0 days 01:31:44.195529157	0.078666661	True	10.0	74.0	0.5227272727272727	1.0	84.0909090909091	280.4099729042547	194.95915628777328	0.0	0.0	0.51062239731372	0.005467794263356527	33.63229956285011	596.5818104274963	522.0090841240592	522.0090841240592	33.63229956285011	33.63229956285011	53.692362938474645	41.76072672992476	['Hover-Continuous-Mix', 'Continuous', 'Hover-Continuous-Mix', 'Unclassified']	51.82804478088874	0.18289473684210528	1.8781324868032276	4.64143712413228	1.0	True	0.8726831044309398	0.05	0.625	37.88294496214603	512.9559836637903	417.6072672992469	417.6072672992469	37.88294496214603	[37.88294496]	29.829090521374802	0.013999999999999999	0.062	10.0	65.0	0.5	118.18181818181816
cor	1	4	179	0 days 01:31:44.218195822	0 days 01:31:44.292862483	0.07466666100000001	True	10.0	84.0	0.5227272727272727	2.0	103.1941031941032	280.39628860803623	194.8024576574977	0.0	0.0	0.4497171837027356	0.006567769377381466	109.87551999145128	78.06600842056923	1.9664750308603852e-13	1.9664750308603852e-13	109.87551999145128	236.3341276044081	5.7768846231221005	0.0	['Unclassified', 'Hover-Continuous-Mix', 'Unclassified']	67.47823990916412	0.23812233285917495	2.9643378017401525	4.9174617183160105	1.0	False	0.345631642599862	0.0	0.0
cor	1	4	180	0 days 01:31:45.670862382	0 days 01:31:45.732862377	0.061999995	True	9.0	39.0	0.2	1.0	57.184750733137825	280.44000000000017	194.93999999999988	0.0	0.0	0.35316951597547364	0.05404256199068501	1.4914545260687415	0.0	-1.8336586729292904e-15	-1.8336586729292904e-15	1.4914545260687415	1.4914545260687415	0.0	0.0	['Hover']	2.9829090521374826	0.01052631578947368	2.527759339093381	6.309423478877187	1.0	False	0.026358009798320373	0.0	0.0
cor	1	4	181	0 days 01:31:47.508862246	0 days 01:31:47.565528909	0.05666666300000001	True	9.0	28.0	0.0	1.0	43.8871473354232	280.9299799820675	193.84283931837052	0.0	0.0	1.0301112954121714	0.4755570248767506	13.011655003289366	308.57679849698087	308.57679849698087	308.57679849698087	13.011655003289366	13.011655003289366	17.89745431282489	17.897454312824895	['Hover-Continuous-Mix', 'Continuous', 'Hover-Continuous-Mix', 'Unclassified']	67.98975460216812	0.2399274047186933	1.8538721221804968	4.0836410594492945	1.0	True	0.8641255742839988	0.036000000000000004	0.6206896551724138	12.09735337811312	497.0458775803405	497.15150868958017	497.15150868958017	12.09735337811312	[12.09735338]	17.89745431282489	0.006	0.04	8.0	22.0	0.0	55.55555555555554
cor	1	4	182	0 days 01:31:49.694195419	0 days 01:31:49.761528747	0.067333328	True	10.0	39.0	0.1	1.0	52.13903743315508	279.8450337302738	194.1081283390453	0.0	0.0	3.2977784244743624	1.154435942448235	1.4914545260687413	0.0	0.0	0.0	1.4914545260687413	1.4914545260687413	0.0	0.0	['Hover']	5.965818104274964	0.02105263157894736	3.0470685454446422	7.1637544501369765	1.0	False	0.0428246771367316	0.0	0.0
cor	1	4	183	0 days 01:31:53.208861826	0 days 01:31:53.339528483	0.13066665700000002	True	10.0	135.0	0.4916387959866221	2.0	92.97520661157024	280.7492661716707	194.81076726645827	0.0	0.0	0.4499539015727387	-1.0818078978761512	17.89745431282489	440.6570190657644	-101.69008132286835	-101.69008132286835	17.89745431282489	17.89745431282489	56.675271990612174	14.914545260687412	['Continuous', 'Fragmented-Continuous-Mix', 'Unclassified', 'Hover-Continuous-Mix']	37.7835146604081	0.1333333333333333	2.793812648414629	8.06895021566271	2.0	True	0.9552800315634762	0.11199999999999999	0.8484848484848485	19.548707538115284	359.4243483868231	39.949674805412705	39.949674805412705	19.548707538115284	[19.54870754]	38.777817677787276	0.0	0.11	10.0	114.0	0.5	92.53246753246755
cor	1	4	184	0 days 01:31:53.886861776	0 days 01:31:53.950195105	0.06333332900000001	True	7.0	27.0	0.0	0.0	38.35227272727273	281.2410383352285	193.77005818888432	0.0	0.0	0.4098746231289092	-0.7362906206026267	1.491454526068741	0.0	0.0	0.0	1.491454526068741	1.491454526068741	0.0	0.0	['Hover']	2.9829090521374817	0.010526315789473684	2.2893986670964304	5.931736334005221	1.0	False	0.03378193227981472	0.0	0.0
cor	1	4	185	0 days 01:31:54.564861726	0 days 01:31:54.614195056	0.04933333	False	8.0	21.0	0.0	1.0	38.18181818181819	280.52476890202337	194.3084595185541	0.0	0.0	0.5012123292706008	-0.3932495813183348	7.9081464548537275	1604.1729821963747	1604.172982196244	1604.172982196244	7.9081464548537275	18.02483506389028	80.20864910981234	80.20864910981234	['Unclassified']	229.2067315662441	0.8088421052631578	2.1413639540366414	3.6143809794020463	1.0	False	0.2738343523510532	0.0	0.0
cor	1	4	186	0 days 01:31:54.705528383	0 days 01:31:54.838861706	0.133333323	True	11.0	180.0	0.6	2.0	123.96694214876034	280.4799488707156	194.04310306035396	0.0	0.0	0.4645784339008865	-0.3189355130050424	101.85111808866523	566.1691538370155	566.169153836965	566.169153836965	101.85111808866523	191.9049750251648	74.73432830647944	74.73432830647944	['Unclassified', 'Hover-Continuous-Mix', 'Continuous', 'Fragmented-Continuous-Mix', 'Unclassified']	89.98442307281404	0.31754385964912285	3.5196624122520683	9.75855267107077	2.0	True	0.9331766486135804	0.064	0.4848484848484849	90.77631026666624	558.4625342395639	558.4430796938325	558.4430796938325	90.77631026666624	[193.52392895]	34.29613594462474	0.026000000000000002	0.08800000000000001	11.0	122.0	0.7333333333333333	173.29545454545456
cor	1	4	187	0 days 01:31:55.357528335	0 days 01:31:55.442861662	0.08533332699999999	True	11.0	83.0	0.3333333333333333	2.0	89.82683982683983	280.5024947097031	194.56455199426472	0.0	0.0	0.4777571308709062	-0.13442216359485734	44.530570849766704	1420.43288197023	-603.6839748373471	-603.6839748373471	44.530570849766704	44.530570849766704	89.48727156412451	23.863272417099857	['Continuous', 'Unclassified']	45.808960443539895	0.16165413533834588	3.178421375486136	6.677906698357573	2.0	True	0.9879113908918208	0.07200000000000001	0.8571428571428571	43.832191349464686	476.5189214974605	476.43686249418107	476.43686249418107	43.832191349464686	[43.83219135]	32.81199957351233	0.0	0.07	11.0	77.0	0.42857142857142855	97.22222222222223
cor	1	4	188	0 days 01:31:58.306194784	0 days 01:31:58.449528107	0.143333323	True	10.0	100.0	0.2863636363636364	1.0	63.13131313131314	281.57694439006815	193.8	0.0	0.0	0.31185842339235914	0.4354722115481281	1.4914545260687413	0.0	7.894919286223336e-16	7.894919286223336e-16	1.4914545260687413	1.4914545260687413	0.0	0.0	['Hover-Continuous-Mix']	18.850328037813252	0.06652046783625731	2.7577152909778895	9.427174975615682	1.0	False	0.6540519424252086	0.0	0.0
cor	1	4	189	0 days 01:31:59.318861376	0 days 01:31:59.404194703	0.08533332699999999	True	10.0	52.0	0.1111111111111111	1.0	54.96828752642706	280.75248781386085	193.89136262368808	0.0	0.0	0.6998937843176983	0.9763620693553574	20.49882848620061	277.4799118267425	69.36997795668572	69.36997795668572	20.49882848620061	20.4988284862006	23.863272417099857	5.965818104274964	['Continuous']	24.69571215258008	0.08714810281517747	4.034690180732243	7.736723132817882	2.0	True	0.969042406110502	0.086	1.0	20.49882848620061	277.4799118267425	69.36997795668572	69.36997795668572	20.49882848620061	[20.49882849]	23.863272417099857	0.0	0.084	10.0	52.0	0.1111111111111111	54.96828752642706
cor	1	4	190	0 days 01:32:00.731527939	0 days 01:32:00.808861266	0.07733332700000001	True	8.0	35.0	0.0	1.0	41.86602870813398	279.391158993468	192.35735061389664	1.1966933500617492	1.1966933500617492	2.9657321474312623	2.03893672589854	0.2947611760069922	0.0	-0.4761334804796636	0.0	1.4914545260687415	1.4914545260687415	2.664535259100376e-15	0.0	['Hover']	5.965818104274964	0.02105263157894736	1.639195126676218	4.062675027243529	1.0	False	0.045793899429391834	0.0	0.0
cor	1	4	191	0 days 01:32:12.308860419	0 days 01:32:12.364860415	0.055999995999999996	True	9.0	52.0	0.0	1.0	84.41558441558442	284.522426172832	172.44317965745205	21.31418823006512	21.31418823006512	1.5324365715802963	14.683299363294447	15.226447658619053	106.53246614776722	106.311687388051	106.53246614776688	36.54063588868415	36.54063588868415	5.965818104275037	5.965818104274965	['Hover-Continuous-Mix', 'Continuous']	18.74971404200703	0.06616541353383458	2.1441101090748917	3.1953343197564608	2.0	True	0.8208419155585451	0.02	0.35714285714285715	17.46100557278999	149.13746848763608	149.40731406832458	149.1454526068739	38.777817677787276	[38.77781768]	2.982909052137522	0.036000000000000004	0.054000000000000006	8.0	25.0	0.25	113.63636363636364
cor	1	4	192	0 days 01:32:12.609527064	0 days 01:32:12.664860393	0.055333329	True	10.0	46.0	0.225	1.0	77.44107744107744	285.2799189816075	173.64792600139506	20.14333657407221	20.14333657407221	1.0763216623269245	14.61360616096938	27.196534864480054	331.4343391263869	61.40463450589058	55.23905652106418	47.33987143855227	47.33987143855229	14.914545260687461	2.9829090521374866	['Continuous']	35.13203994739701	0.1239766081871345	1.5106892157106686	3.4391782402400186	1.0	True	0.979789481691715	0.054000000000000006	1.0	27.196534864480054	331.4343391263869	61.40463450589058	55.23905652106418	47.33987143855227	[47.33987144]	14.914545260687461	0.0	0.052000000000000005	10.0	46.0	0.225	77.44107744107744
cor	1	4	193	0 days 01:32:33.578192186	0 days 01:32:33.678192179	0.099999993	True	11.0	101.0	0.3	2.0	91.8181818181818	282.02115304025045	127.68123415501421	65.92603715547426	65.92603715547426	2.4060230175327995	19.450790910343088	28.892564823759518	228.26353153131825	228.8765995466835	228.26353153131717	94.8186019792338	221.27720959219062	22.826353153132143	22.826353153131752	['Unclassified', 'Hover-Continuous-Mix', 'Continuous', 'Hover-Continuous-Mix', 'Unclassified']	79.10674806268601	0.2791578947368421	3.188484886717932	8.836047522473509	1.0	True	0.8123531662928114	0.02	0.2	28.323385152396856	551.8589407839951	570.8251899994292	570.1901865960317	94.24428774099384	[220.70289535]	11.403803731920705	0.042	0.06	11.0	35.0	0.5	159.0909090909091
cor	1	4	194	0 days 01:32:33.912192161	0 days 01:32:33.967525491	0.05533333	True	10.0	49.0	0.125	1.0	79.54545454545455	283.34085367434307	127.68599418045609	65.97836812417391	65.97836812417391	2.994363104816491	14.391556607732296	1.8458235032180348	0.0	0.31695488981561193	-6.496390726949487e-14	64.13254462095588	64.1325446209559	0.0	0.0	['Hover']	15.127610192982946	0.05338345864661653	1.870441557608453	3.802975863509383	1.0	False	0.16408619387300807	0.0	0.0
cor	1	4	195	0 days 01:32:35.119525406	0 days 01:32:35.232858731	0.113333325	True	11.0	105.0	0.36507936507936506	2.0	85.22727272727272	286.1478541602732	128.01541509801336	65.77067850267797	65.77067850267797	1.290963129365971	-4.660306588624088	34.95278782330083	334.1816154940375	332.8305960590008	334.18161549403663	100.72346632597879	115.72346632597879	37.42834093533243	37.42834093533215	['Hover-Continuous-Mix', 'Continuous']	25.94065550698131	0.09154135338345863	2.6912637179182446	9.644256102319368	1.0	True	0.9802488190289506	0.098	0.875	37.29702079542845	367.79940144222036	366.3505217618977	367.80091329807135	103.07543489707795	[118.0754349]	37.428340935332386	0.013999999999999999	0.11	11.0	96.0	0.3616071428571429	89.05380333951763
cor	1	4	196	0 days 01:32:35.326192057	0 days 01:32:35.432192049	0.10599999199999999	False	11.0	67.0	0.16233766233766234	1.0	57.46140651801029	286.1443781741932	127.88914213907229	65.89668290492726	65.89668290492726	2.3563821241765903	-7.346987735887251	8.393033924008314	109.28747076884248	27.968455578782816	27.518207476909733	74.2897168289356	120.472991256222	20.252013810416532	2.9169299925524257	['Unclassified']	209.87297840416355	0.7406156901688183	1.2571809647776464	2.9204197406288417	1.0	False	0.456734771872508	0.0	0.0
cor	1	4	197	0 days 01:32:57.891523728	0 days 01:32:57.933523725	0.041999997	True	9.0	34.0	0.3333333333333333	1.0	73.5930735930736	287.18639537008755	146.71698253012448	47.131540675702546	47.131540675702546	3.134681772713433	13.037722852864425	7.9986147774227225	213.0649322955344	67.84236025159304	-71.02164409851122	39.13292589827982	39.13292589827982	8.948727156412454	2.9829090521374795	['Hover-Continuous-Mix']	80.11241454312096	0.28270676691729324	2.022916964422759	2.7585176854304887	2.0	False	0.6407894443567955	0.0	0.0
cor	1	4	198	0 days 01:32:58.096190380	0 days 01:32:58.186857040	0.09066666	True	11.0	79.0	0.29166666666666663	1.0	79.79797979797979	287.1757045070274	146.99138318048486	46.856934415973825	46.856934415973825	3.2364735618040754	10.975985612091916	52.93940591919882	234.35524817449848	233.19940756289157	234.35524817449746	99.79634033517263	114.79634033517263	19.708120903583925	19.7081209035837	['Continuous', 'Hover-Continuous-Mix']	34.2703106656684	0.12093567251461985	1.1372871872652062	2.982613127085512	1.0	True	0.8697802739909968	0.055999999999999994	0.6222222222222222	49.602412909536476	323.23776387145733	323.1125438929142	323.24051611077635	96.43770253274648	[111.43770253]	16.717617470082587	0.0	0.054000000000000006	9.0	52.0	0.3875	84.41558441558442
cor	1	4	199	0 days 01:33:04.797523220	0 days 01:33:04.877523214	0.079999994	True	10.0	50.0	0.225	1.0	56.81818181818181	288.4679090821476	123.96667852666715	79.68061134215438	94.68061134215435	3.012159556406936	7.4181074843268755	8.911094080192594	37.28636315171853	39.421345194557574	-37.28636315171853	70.76951726196177	70.76951726196178	8.948727156412462	2.9829090521374866	['Continuous', 'Hover-Continuous-Mix']	35.94405407825665	0.12684210526315792	1.8667014381826512	3.500980750031073	1.0	True	0.8562766095322424	0.012	0.15	6.511889673172137	13.519338169434375	3.4468534055529902	0.0	73.08127177736831	[73.08127178]	0.0	0.0	0.01	7.0	9.0	0.5	68.18181818181817
cor	1	4	200	0 days 01:33:04.907523211	0 days 01:33:04.950189875	0.04266666400000001	True	10.0	26.0	0.0	1.0	56.27705627705628	288.4992972204488	124.33348481609328	79.72824429701312	94.72824429701313	2.255578266589514	7.059877458794566	21.135387915741124	142.04328819702297	141.16447830124432	-142.04328819702297	58.592856381272	58.592856381272	5.965818104274965	5.965818104274965	['Hover-Continuous-Mix', 'Unclassified']	105.68020641858507	0.3729323308270677	2.214825902352373	3.5899478678452352	1.0	False	0.688733174299576	0.0	0.0
cor	1	4	201	0 days 01:33:05.448856505	0 days 01:33:05.527523166	0.078666661	True	11.0	46.0	0.25	1.0	52.27272727272727	286.00757354467135	120.46222234529469	77.0672011468042	92.0672011468042	1.682043543793809	5.714228769767794	3.929847168786316	72.92324981397067	-1.842350161567096	-1.8189894035458568e-13	75.56066227103787	183.0504787420512	5.833859985104851	0.0	['Hover-Continuous-Mix']	42.80474489817285	0.15105263157894738	1.4221734293561488	4.805262712724293	1.0	False	0.4893620171208371	0.0	0.0
cor	1	4	202	0 days 01:33:25.849521669	0 days 01:33:26.021521656	0.17199998700000002	True	11.0	260.0	0.5714285714285714	3.0	137.42071881606765	249.15903225366108	193.85911830452054	181.03268666680802	307.49129427976493	0.184591712398612	0.0	73.02930856288773	876.619161702546	757.9678264578532	-757.9678264578537	108.00337810392031	188.87806901918339	153.66693812439215	130.3704661507509	['Hover-Continuous-Mix', 'Continuous', 'Fragmented-Continuous-Mix', 'Unclassified', 'Hover-Continuous-Mix', 'Unclassified', 'Hover-Continuous-Mix']	55.21850245352176	0.19485924112607106	5.125402908650028	16.00185946000119	2.0	True	0.9648381223416662	0.07	0.4069767441860465	25.459555803339203	841.0966321070234	701.4788470933985	-701.4788470933989	155.57313086346892	[282.03173848]	51.9919616080989	0.004	0.07200000000000001	11.0	78.0	0.3939393939393939	101.2987012987013
cor	1	4	203	0 days 01:33:26.034854989	0 days 01:33:26.096854984	0.061999995	True	11.0	87.0	0.7083333333333333	3.0	127.56598240469208	248.99182046807968	193.89112449618776	181.03268666680816	307.49129427976504	0.15091571517730604	0.0	84.83781190984199	10382.894081605778	-2102.7494540443595	2102.7494540443568	97.71264729542143	159.3861671081425	1111.5943094618028	130.3704661507509	['Unclassified', 'Fragmented-Continuous-Mix', 'Fragmented', 'Fragmented-Continuous-Mix', 'Unclassified']	227.27842519834613	0.8020373514431239	2.428146780539246	4.644768038987072	1.0	False	0.26272381240546444	0.0	0.0
cor	1	4	204	0 days 01:33:30.864854633	0 days 01:33:31.021521288	0.15666665500000002	True	11.0	258.0	0.7241379310344828	3.0	148.4464902186421	248.63944287928211	193.7966253039764	181.03268666680802	307.4912942797649	0.5059316758339684	0.0	97.3905391572578	896.4703276172211	730.7336765193892	-730.7336765193892	83.64214750955031	139.66811290769576	144.4932626964945	115.4559208900635	['Unclassified', 'Hover-Continuous-Mix', 'Continuous', 'Hover-Continuous-Mix', 'Unclassified', 'Hover-Continuous-Mix', 'Unclassified']	121.01548749494471	0.4270486342438373	4.150231049578701	9.145263698131501	2.0	True	0.8155423966916168	0.013999999999999999	0.08860759493670886	88.7433367084292	355.6650686006701	305.4590285335876	-305.45902853358814	92.28934995837886	[218.74795757]	2.850950932980112	0.046	0.057999999999999996	10.0	33.0	1.0	214.28571428571428
cor	1	4	205	0 days 01:33:31.037521287	0 days 01:33:31.099521282	0.061999995	False	10.0	72.0	0.5	2.0	105.57184750733137	248.5196330024493	193.8	181.03268666680816	307.49129427976504	0.4139299322995681	0.0	118.53593088089531	144.33430897439433	48.111436324797275	-48.11143632479757	62.49675578591276	62.49675578591278	8.948727156412351	2.982909052137451	['Unclassified']	214.67322888124917	0.7575551782682516	2.632956135760515	6.145121834519534	1.0	False	0.28738217523047577	0.0	0.0
cor	1	4	206	0 days 01:33:31.219521273	0 days 01:33:31.278854602	0.059333329	False	11.0	57.0	0.14285714285714285	2.0	89.34169278996866	248.52000000000007	193.8	181.03268666680813	307.49129427976504	0.2340416451843297	0.0	63.36556337373438	2880.7509885392246	-2880.7509885390614	740.4813979292444	126.228201655513	245.00000874343843	84.14354062879002	42.947921079896304	['Unclassified']	221.455282388	0.7814882032667879	1.6209049083670275	3.583975773539453	1.0	False	0.32935595227360226	0.0	0.0
cor	1	4	207	0 days 01:33:32.055521212	0 days 01:33:32.230187866	0.17466665399999998	True	11.0	192.0	0.4868421052631578	2.0	100.31347962382445	248.97835219341724	193.7470471473956	181.03268666680802	307.4912942797649	0.517350917411623	0.0	153.0049951713803	411.20276916535016	378.10962952314696	378.1096295231473	121.11776111144896	136.11776111144894	71.5492818347711	65.79107553702774	['Hover-Continuous-Mix', 'Hover', 'Hover-Continuous-Mix', 'Unclassified', 'Hover-Continuous-Mix']	50.263731844063784	0.17737447065940712	4.516872500467961	12.166626255532195	2.0	False	0.7076688189946351	0.0	0.0
cor	1	4	208	0 days 01:33:33.092854469	0 days 01:33:33.186854462	0.093999993	True	10.0	58.0	0.0	1.0	56.09284332688589	248.650660637682	193.77594492824304	181.03268666680813	307.49129427976516	0.5563514235924211	0.0	22.21642331127033	399.46542606695533	215.0967678822068	-215.09676788220702	158.81626335553773	285.27487096849467	37.5497500502936	20.21909618092741	['Continuous']	32.17733807305751	0.11354983202687567	1.416369321370838	4.135336885428817	1.0	True	0.9586522083608928	0.094	1.0	22.21642331127033	399.46542606695533	215.0967678822068	-215.09676788220702	158.81626335553773	[285.27487097]	37.5497500502936	0.0	0.092	10.0	58.0	0.0	56.09284332688589
cor	1	4	209	0 days 01:33:34.657521020	0 days 01:33:34.768854345	0.111333325	True	11.0	159.0	0.6666666666666666	2.0	131.40495867768595	248.51861221938702	193.80345091600756	181.03268666680802	307.49129427976504	0.655520203509115	0.0	43.878064569267494	1260.4111904993727	6.614506921984933e-13	-5.291605537587946e-13	137.15462209754062	263.61322971049754	138.64523095493053	0.0	['Continuous', 'Unclassified', 'Fragmented-Continuous-Mix', 'Unclassified', 'Hover-Continuous-Mix', 'Unclassified']	67.63068341846254	0.2386602870813397	3.381768594689293	8.59003406031178	2.0	True	0.8964421591682393	0.062	0.5636363636363636	30.049117596086887	862.3850867927295	861.8739155464433	-861.8739155464427	150.9835690707212	[277.44217668]	51.99196160809896	0.0	0.06	11.0	61.0	0.55	89.44281524926687
cor	1	4	210	0 days 01:33:37.016187513	0 days 01:33:37.206187499	0.189999986	True	11.0	266.0	0.6	2.0	127.27272727272728	248.52	193.79999999999995	181.0326866668081	307.49129427976493	0.2401949293849208	0.0	82.88901831936957	571.645695123543	571.6456951235077	-571.645695123508	98.14366834743844	180.6745491053684	112.87036278364641	107.16846091768602	['Continuous', 'Unclassified', 'Hover-Continuous-Mix', 'Unclassified']	55.76469975364387	0.1967867036011081	5.56025243739779	10.275572391201573	2.0	True	0.9568375937889428	0.11599999999999999	0.6105263157894737	56.008367815258204	578.2239713492869	571.415583203281	-571.4155832032811	125.02431885154988	[251.48292646]	66.26546196229019	0.0	0.114	11.0	150.0	0.4375	117.55485893416927
cor	1	4	211	0 days 01:33:38.630854061	0 days 01:33:38.680854057	0.049999996000000005	True	8.0	16.0	0.0	0.0	29.09090909090909	248.620834395796	193.7087609330188	181.0326866668081	307.49129427976493	0.6921057484196327	0.0	1.4442211557887221	0.0	-4.5474735088646405e-15	-5.820766091346741e-13	179.58846551101934	306.04707312397625	0.0	0.0	['Hover']	5.965818104274964	0.021052631578947368	1.320972945649038	2.4632447092404046	0.0	False	0.07711547764136169	0.0	0.0
cor	1	4	212	0 days 01:33:38.849520711	0 days 01:33:38.917520706	0.06799999500000001	True	10.0	93.0	0.6904761904761905	2.0	124.33155080213905	248.5071299492302	193.81286997090558	181.0326866668081	307.49129427976504	0.6238154409389072	0.0	51.20909051484064	11541.442189580017	5.777966340675072e-12	-4.600973197204224e-12	140.7767405274412	231.36516943070487	1269.3697211916658	0.0	['Fragmented', 'Unclassified']	220.82300247735415	0.7792569659442724	4.239721286048373	8.553885578221976	1.0	False	0.3339131272154191	0.0	0.0
cor	1	4	213	0 days 01:33:39.161520688	0 days 01:33:39.220187351	0.058666663	True	7.0	38.0	0.375	1.0	59.561128526645774	248.52000000000007	193.80000000000007	181.03268666680813	307.49129427976504	0.3406239939893106	0.0	40.0555730369561	4033.248791284194	3933.647332264682	-3933.6473322646834	140.97711362985197	263.0750796009828	160.76635711558444	154.98947249246226	['Unclassified', 'Hover-Continuous-Mix', 'Unclassified']	97.09883259371664	0.3426497277676951	1.5262749392899826	3.0339211301377453	1.0	False	0.7179881655518845	0.0	0.0
cor	1	4	214	0 days 01:33:41.550187179	0 days 01:33:41.624187174	0.073999995	True	9.0	37.0	0.0	1.0	45.45454545454545	248.52	193.8	181.03268666680813	307.49129427976504	0.2651637103681284	-8.583736100287776e-05	24.942089690379987	429.3630463131309	429.3630463131303	-429.3630463131298	156.09059697642817	282.54920458938494	31.772865427171606	31.772865427171606	['Continuous']	32.48952291922716	0.11465149359886202	1.1626051431490416	2.8629870316241584	1.0	True	0.9253506127302144	0.07400000000000001	1.0	24.942089690379987	429.3630463131309	429.3630463131303	-429.3630463131298	156.09059697642817	[282.54920459]	31.772865427171606	0.0	0.07200000000000001	9.0	37.0	0.0	45.45454545454545
cor	1	4	215	0 days 01:33:43.418187041	0 days 01:33:43.538853699	0.120666658	True	11.0	148.0	0.3333333333333333	3.0	112.12121212121212	248.82934226819413	193.53595751506958	181.03268666680802	307.4912942797649	0.6140178757677928	-0.0016551873827097552	121.23731168969705	1508.9993336424563	1484.1417582079196	-1484.1417582079196	59.795374977111024	95.62531380078217	391.6421841053789	178.09701098495063	['Unclassified', 'Fragmented-Continuous-Mix', 'Fragmented', 'Fragmented-Continuous-Mix', 'Unclassified', 'Fragmented-Continuous-Mix', 'Unclassified', 'Hover-Continuous-Mix']	173.20758562744984	0.6112280701754383	2.22005267938968	5.728992763889918	2.0	False	0.6116111214119819	0.0	0.0
cor	1	4	216	0 days 01:33:44.682186948	0 days 01:33:44.777520275	0.095333327	True	11.0	160.0	0.7416666666666667	3.0	151.51515151515153	249.27408724607207	193.52508266004727	181.0326866668081	307.49129427976504	0.16374029508126536	-0.012851642863687118	63.326964222594796	868.8401972786702	778.5763750423836	-778.5763750423836	117.70572244421328	244.16433005717013	86.29710125031309	74.74333200406889	['Unclassified', 'Hover-Continuous-Mix', 'Unclassified', 'Fragmented-Continuous-Mix', 'Unclassified', 'Hover-Continuous-Mix', 'Continuous', 'Hover-Continuous-Mix', 'Unclassified', 'Fragmented-Continuous-Mix']	76.68562021536775	0.2706140350877193	5.035033169912817	9.484254530785037	1.0	True	0.8068124516043066	0.016	0.16666666666666666	90.77973023198645	193.93916000238733	178.18443331126036	-178.18443331126036	90.25295643482167	[216.71156405]	2.850950932980112	0.064	0.078	10.0	35.0	1.0	198.86363636363637
cor	1	4	217	0 days 01:33:44.793520273	0 days 01:33:44.918186931	0.124666658	True	11.0	195.0	0.6666666666666666	3.0	142.9618768328446	249.3638051961557	193.38790281681716	181.03268666680802	307.4912942797649	0.2925777900049101	-0.015769480695883343	161.0990734581861	643.0725011521603	598.4321323740613	598.4321323740613	129.21183939825477	144.21183939825468	79.74099014286809	74.20558441438375	['Unclassified', 'Hover-Continuous-Mix', 'Unclassified', 'Fragmented-Continuous-Mix', 'Continuous']	56.62716055428735	0.19983022071307302	5.302498813181809	15.595844935249918	2.0	True	0.9468403979058976	0.064	0.5161290322580645	186.377345859765	606.9828785503195	607.4460099299432	607.4460099299429	154.49011179983373	[169.4901118]	38.8765446355164	0.06	0.122	11.0	77.0	0.4444444444444444	109.375
cor	1	4	218	0 days 01:33:48.374186676	0 days 01:33:48.466186670	0.091999994	True	11.0	137.0	0.625	3.0	135.37549407114625	248.54017469645612	192.74862542207995	180.8903689240126	307.3489765369695	0.7635055786675421	-0.7291574209127777	58.81958074755681	1193.0522591230474	-315.6512072758813	313.9611208218518	122.07078817645576	248.5293957894126	109.76080783932001	28.884423115610502	['Unclassified', 'Hover-Continuous-Mix', 'Unclassified', 'Hover-Continuous-Mix', 'Unclassified']	124.11495490850308	0.4379862700228833	3.0821320151239813	8.248135671972936	2.0	False	0.6007646551712391	0.0	0.0
cor	1	4	219	0 days 01:33:51.856853086	0 days 01:33:51.912853082	0.055999995999999996	True	6.0	25.0	0.2	1.0	40.58441558441558	245.42395020869168	191.03811656107374	179.40402659081437	305.86263420377117	2.2823960929076232	-0.5525265322725252	0.18443892020503336	0.0	-2.71737113142413	-1.2870974127768672e-12	179.58846551101936	306.04707312397625	3.694822225952521e-13	2.8421709430404014e-14	['Hover']	12.996960870027596	0.045864661654135316	1.5796794687911937	4.18132155997671	1.0	False	0.1852135975216824	0.0	0.0
cor	1	4	220	0 days 01:33:53.011519668	0 days 01:33:53.208186320	0.19666665200000005	True	11.0	299.0	0.6666666666666666	3.0	138.68274582560298	246.28032228537543	190.7167493455666	179.02302900250808	305.481636615465	0.9324005439213876	-0.36894087605918224	104.0644106451105	1507.2950633127093	-0.5808476096518742	-4.083445599796821e-13	88.89910425522751	106.94122128090721	298.41274146141535	2.8421709430404014e-14	['Unclassified', 'Fragmented-Continuous-Mix', 'Continuous', 'Hover-Continuous-Mix', 'Unclassified']	121.66007634075018	0.4293233082706766	4.1837435626413235	9.817553014451835	3.0	True	0.9903084450244146	0.08199999999999999	0.4183673469387755	117.22024365982556	471.841863152333	-214.8463609599001	-324.58520112370013	84.77537455974827	[95.019277]	42.268764621265994	0.096	0.17600000000000002	11.0	189.0	0.8229166666666667	209.53436807095343
cor	1	4	221	0 days 01:33:57.219519358	0 days 01:33:57.348186015	0.12866665700000002	True	11.0	130.0	0.4117647058823529	2.0	92.32954545454544	243.8683333592083	188.33842956484608	176.8208448468572	303.27945245981414	3.5401392674032013	1.1468645013354983	98.4708972123336	2176.202351547184	1397.0213274911528	-1098.259493316456	79.54194109263847	148.93336713097418	175.895185956241	128.80455820725984	['Fragmented', 'Fragmented-Continuous-Mix', 'Unclassified', 'Hover-Continuous-Mix']	157.02219682267463	0.5541118421052631	2.2090154738384773	6.771915737863705	1.0	False	0.4210893163336836	0.0	0.0
cor	1	4	222	0 days 01:34:00.224185803	0 days 01:34:00.309519130	0.08533332699999999	True	11.0	85.0	0.2777777777777778	2.0	89.85200845665962	246.99401334237805	192.59825888249514	180.8494850598384	307.3080926727953	0.9767320698700068	1.4486778232669275	86.43036613182305	3431.839111735534	-1357.2467758245168	1357.9660916357311	94.41911892801537	126.7689952941206	261.986686938807	83.63360721023741	['Fragmented', 'Fragmented-Continuous-Mix', 'Unclassified']	224.96683851353146	0.7938800489596083	1.8739271520242664	4.067059578258712	1.0	False	0.4195591848712292	0.0	0.0
cor	1	4	223	0 days 01:34:08.721518511	0 days 01:34:08.783518506	0.061999995	True	9.0	35.0	0.125	1.0	51.319648093841636	260.7766381775169	193.3438850292068	180.6206552412354	307.0792628541924	1.8207037395418244	-1.2474798340487003	12.585958976460251	0.0	-2.7750381049263524	-7.041249304048476e-13	168.03469626477522	294.4933038777321	0.0	0.0	['Hover-Continuous-Mix', 'Unclassified']	106.99983438635094	0.3775891341256367	2.3527740622499778	3.933110668199848	2.0	False	0.42880094806768093	0.0	0.0
cor	1	4	224	0 days 01:34:11.534851637	0 days 01:34:11.573518301	0.038666663999999996	True	6.0	18.0	0.0	1.0	40.90909090909091	246.53402189250957	187.1168310114863	175.41418229396064	301.87278990691755	1.7396522803949144	-3.854861709547919	4.174283217058705	0.0	1.7435124710584653	-7.275957614183427e-13	179.58846551101936	306.0470731239763	1.7053025658242404e-13	0.0	['Hover-Continuous-Mix']	14.914545260687408	0.05263157894736842	1.8594341507087624	3.4323740079510072	1.0	False	0.3292743935827258	0.0	0.0
cor	1	4	225	0 days 01:34:32.102183455	0 days 01:34:32.271516776	0.169333321	True	11.0	195.0	0.5789473684210527	2.0	104.27807486631016	250.69327478343308	192.51142951499102	180.50182672888454	306.9604343418414	2.578663458117971	0.3333175691681965	94.17403186952306	3142.8884291463005	-0.02088735587765336	-1.05715384159018e-11	86.32779485936146	129.47249628025264	837.6702241295767	0.0	['Unclassified', 'Fragmented-Continuous-Mix', 'Unclassified', 'Hover-Continuous-Mix', 'Unclassified']	143.4252858363046	0.5061300309597523	2.514730244879156	7.608838803011768	2.0	False	0.7248024666295623	0.0	0.0
cor	1	4	226	0 days 01:34:37.296849739	0 days 01:34:37.403516398	0.106666659	True	11.0	175.0	0.5	3.0	147.30639730639732	240.05830945918305	190.64872361139808	179.39424103136972	305.85284864432657	1.915770104856696	-0.386667287559798	92.41151442330099	646.3670773014045	641.3406980406849	-646.3670773013448	86.98272660806866	164.26298681598675	69.80764434854522	69.80764434854525	['Hover-Continuous-Mix', 'Continuous', 'Fragmented-Continuous-Mix']	69.32501593393592	0.24463937621832366	2.9823450186778877	4.68019968159746	1.0	True	0.8631700093066054	0.08	0.7407407407407407	85.28896080029924	667.9672249587222	662.3801277205866	-667.5205570223633	94.14450782932006	[188.98846354]	51.910190035720326	0.006	0.084	11.0	151.0	0.5694444444444444	171.5909090909091
cor	1	4	227	0 days 01:34:40.709516155	0 days 01:34:40.744182819	0.034666664	True	7.0	24.0	0.0	1.0	64.17112299465239	252.11254693327126	193.11022376964507	180.99897457787893	307.4575821908358	1.021958203254154	-2.0434305322371458	1.410509066859566	0.0	-0.943942460095754	-8.559950134333443e-13	179.58846551101936	306.04707312397625	0.0	0.0	['Hover']	8.948727156412446	0.03157894736842105	1.5283209688307215	2.1192740036383158	0.0	False	0.08733318605982386	0.0	0.0
cor	1	4	228	0 days 01:34:42.657516011	0 days 01:34:42.725516006	0.06799999500000001	True	11.0	56.0	0.3333333333333333	1.0	74.8663101604278	244.11510112679025	189.5104501868749	177.97253004129266	304.4311376542496	2.8899351989638227	-9.243950799898087	24.380045334322737	446.0094745792817	271.7206650727719	-276.10110331098394	153.59248470696988	280.05109231992674	28.884423115610502	17.3306538693663	['Continuous']	49.91986031371256	0.17616099071207428	1.210628303754401	3.1106723714631457	1.0	True	0.9354483858659204	0.068	1.0	24.380045334322737	446.0094745792817	271.7206650727719	-276.10110331098394	153.59248470696988	[280.05109232]	28.884423115610502	0.0	0.066	11.0	56.0	0.3333333333333333	74.8663101604278
cor	1	4	229	0 days 01:34:54.448181809	0 days 01:34:54.527515137	0.07933332800000001	True	11.0	89.0	0.4305555555555556	2.0	101.13636363636364	258.6381649668563	114.56434954096059	99.66422847186504	226.1228360848219	1.1568896864874278	-7.195815557153118	51.38467937872578	0.0	0.9278085475903276	-9.094947017729284e-14	100.86590351373755	115.86590351373749	0.0	0.0	['Unclassified', 'Hover-Continuous-Mix', 'Unclassified']	71.88810815651331	0.2536842105263158	3.1944677594053688	5.160930002084352	1.0	False	0.5409508256421992	0.0	0.0
cor	1	4	230	0 days 01:34:55.020181767	0 days 01:34:55.170848423	0.150666656	True	10.0	132.0	0.3125	2.0	80.0	258.6104109493482	114.88922381919123	99.67923918063366	226.13784679359054	0.6775567735062165	-5.474017712411693	14.688141663771866	249.28171617757008	203.7369632119476	-230.27537662432633	85.13568965806508	177.87200190756678	40.24320835960917	34.54130649364892	['Hover-Continuous-Mix', 'Continuous', 'Hover-Continuous-Mix']	35.75513650495462	0.12617543859649125	2.016929693125269	3.845713703373367	3.0	True	0.8830079915820418	0.102	0.68	9.639004518020792	265.9067069404606	235.4257619328724	-237.90267117762392	90.08525343876394	[216.54386105]	28.509509329801602	0.008	0.10800000000000001	10.0	90.0	0.26136363636363635	80.21390374331551
cor	1	4	231	0 days 01:35:08.071514139	0 days 01:35:08.128847468	0.057333329	True	8.0	34.0	0.5	1.0	55.194805194805184	311.86784980885426	171.94110308738826	153.8728103265474	168.8728103265474	3.3835258499103715	25.42627434806377	15.6632718730895	0.0	10.876543930899034	-2.598556290779795e-13	169.53608219963698	184.53608219963695	1.7053025658242404e-13	0.0	['Hover-Continuous-Mix']	14.062285531505273	0.04962406015037592	1.5351780774101087	2.3673835223015187	0.0	False	0.4876218913022322	0.0	0.0
cor	1	4	232	0 days 01:35:20.584179884	0 days 01:35:20.711513208	0.127333324	True	11.0	111.0	0.3333333333333333	1.0	78.83522727272728	309.77701751271684	186.2728232233265	168.16749900921462	183.16749900921462	3.3311664834246013	-3.882921918482607	42.79995483688329	3698.192217740529	471.7195034934911	-492.820089144087	132.22506965519517	153.72248263100497	559.6687222820383	74.20558441438375	['Continuous', 'Hover-Continuous-Mix', 'Unclassified', 'Fragmented-Continuous-Mix', 'Fragmented']	92.28374880050337	0.3256578947368421	1.8394339610609256	4.852842170176696	2.0	True	0.8693542076552281	0.064	0.5	24.28182579303241	561.2320883767577	522.8383626173492	-560.7193937814869	144.30370947947006	[159.30370948]	35.88604120201521	0.0	0.062	11.0	32.0	0.0	45.45454545454545
cor	1	4	233	0 days 01:35:28.584179295	0 days 01:35:28.692845953	0.108666658	True	10.0	92.0	0.2708333333333333	2.0	77.44107744107744	311.66494524965384	190.95101876042443	171.0313339163952	186.0313339163952	1.2084220548594176	-3.348970810292605	128.698429947514	1555.968774755258	1555.9687747552584	-1555.968774755259	42.33290396888129	45.11068174665907	168.0446276735682	168.0446276735682	['Unclassified', 'Fragmented-Continuous-Mix', 'Unclassified', 'Fragmented-Continuous-Mix', 'Unclassified', 'Hover-Continuous-Mix']	155.16650976767016	0.5475633528265108	1.6678645709909674	4.211337912369753	2.0	False	0.7262141267811569	0.0	0.0
cor	1	4	234	0 days 01:35:31.084179111	0 days 01:35:31.134845773	0.050666662	True	10.0	36.0	0.0	2.0	65.45454545454545	308.22756059624226	183.5080171203679	165.3771277677103	180.37712776771042	0.17006980979522435	-2.604287672074861	4.15895443192658	0.0	0.21866990397384028	-2.9103830456733704e-13	169.53608219963698	184.53608219963692	3.9790393202565615e-13	0.0	['Hover-Continuous-Mix']	12.408901656891926	0.04378947368421052	1.9101162161715883	4.050742028344347	1.0	False	0.2619361674952814	0.0	0.0
cor	1	4	235	0 days 01:35:31.902179050	0 days 01:35:32.111512368	0.209333318	True	11.0	319.0	0.6	3.0	138.0952380952381	308.94278908701716	183.54	165.42108605357726	180.42108605357728	0.3638745766434552	-1.2315384479616598	79.1232625081938	1781.183193191915	-311.6345911541101	120.97387494114231	118.13987329419254	186.2154007289339	161.35263271925137	2.990503433501289	['Hover-Continuous-Mix', 'Unclassified', 'Hover-Continuous-Mix', 'Unclassified', 'Fragmented-Continuous-Mix', 'Unclassified', 'Continuous', 'Fragmented-Continuous-Mix', 'Unclassified']	79.7431019938087	0.2814035087719298	5.1502134119545415	12.01224020921075	1.0	True	0.9703191343055124	0.08199999999999999	0.3904761904761905	123.1410627635312	425.2702506089679	385.41639156880683	385.4165149214334	106.86547417070845	[233.32408178]	37.306056089517824	0.11599999999999999	0.196	11.0	161.0	0.6	178.49223946784923
cor	1	4	236	0 days 01:35:34.104178888	0 days 01:35:34.142845552	0.038666663999999996	True	9.0	26.0	0.3333333333333333	1.0	62.20095693779904	308.94	183.53999999999996	165.421039337088	180.42103933708802	3.6729772597570614e-13	-1.1291400324182632	27.836125400648704	314.78983510539473	157.39491755269648	-157.3949175526987	137.58491393643922	152.58491393643925	11.962013734005039	5.981006867002519	['Continuous']	29.515100094834036	0.10415512465373962	3.162632384190473	5.831955231442307	1.0	True	0.8900297099677277	0.038	1.0	27.836125400648704	314.78983510539473	157.39491755269648	-157.3949175526987	137.58491393643922	[152.58491394]	11.962013734005039	0.0	0.036000000000000004	9.0	26.0	0.3333333333333333	62.20095693779904
cor	1	4	237	0 days 01:35:34.176178883	0 days 01:35:34.230178879	0.053999995999999995	True	11.0	42.0	0.3333333333333333	1.0	70.7070707070707	308.9400000000001	183.54	165.42103933708802	180.42103933708802	1.8439918253247706e-13	-1.255264071123937	37.752005206468795	0.0	5.389598232728462e-13	-4.042198674546348e-13	127.6690341306193	142.6690341306193	0.0	0.0	['Hover-Continuous-Mix', 'Unclassified', 'Fragmented-Continuous-Mix']	61.97822141663434	0.21871345029239764	1.9082434840312088	5.426247166404222	1.0	False	0.7191110463813328	0.0	0.0
cor	1	4	238	0 days 01:35:34.264178876	0 days 01:35:34.349512203	0.08533332699999999	True	11.0	112.0	0.4722222222222222	2.0	118.39323467230444	308.94	183.54	165.421039337088	180.42103933708802	3.374321253691508e-13	-1.4407379873362485	116.48156787094568	249.2833612235189	116.68099224769578	116.68099224769621	100.20598114073448	226.66458875369133	22.863844531712655	11.460040799791985	['Hover-Continuous-Mix', 'Unclassified']	50.43197397451045	0.17796817625458994	4.617425182802976	9.02567348739576	2.0	False	0.6611887329973496	0.0	0.0
cor	1	4	239	0 days 01:35:35.026845487	0 days 01:35:35.140845478	0.113999991	True	11.0	88.0	0.16666666666666666	1.0	70.17543859649122	308.93999999999994	183.54	165.42103933708802	180.42103933708808	1.4349780266612652e-08	-3.723187895439058	103.64342291518804	183.16108214879281	130.82934439199494	-130.82934439199508	61.777616421899964	61.77761642189999	20.88036336496236	14.914545260687413	['Unclassified', 'Hover-Continuous-Mix', 'Continuous', 'Hover-Continuous-Mix', 'Unclassified']	72.32246157989474	0.2552169898430286	1.3861855084052903	2.7700218733984547	3.0	True	0.8233152056485533	0.036000000000000004	0.3157894736842105	107.0885956508439	307.50118376259985	331.4343391263875	-331.43433912638784	58.33244368624412	[58.33244369]	11.931636208549927	0.057999999999999996	0.092	11.0	33.0	0.0	83.33333333333333
cor	1	4	240	0 days 01:35:36.217512066	0 days 01:35:36.310845392	0.093333326	True	10.0	62.0	0.26666666666666666	1.0	61.26482213438735	308.94000000000005	183.54	165.42103933708796	180.42103933708802	0.7798927286946037	-10.700615640312998	114.5146370541389	1648.245955291431	1493.9426527982525	-1583.4001063319245	52.15880663242057	54.441415328072736	150.14717336074327	144.18135525646832	['Unclassified', 'Hover-Continuous-Mix', 'Continuous']	126.19002207520741	0.4453089244851259	1.3881783012512736	4.407987027793135	1.0	True	0.8116726910084678	0.004	0.043478260869565216	138.57485786785065	815.3173510526419	1118.5908945515607	-1118.5908945515534	26.84618146923734	[26.84618147]	2.9829090521374795	0.08800000000000001	0.09	2.0	2.0		45.45454545454545
cor	1	4	241	0 days 01:35:36.464845381	0 days 01:35:36.512178711	0.04733333	True	10.0	24.0	0.0	1.0	45.45454545454545	308.9400003063832	183.5400002863894	165.42103962856913	180.42103962856913	2.068499259186245	-12.422778540850386	148.14502470160622	279.647723637889	31.07190370984351	-31.07196929309855	17.27601492696292	17.27601492696292	11.931636208549929	0.0	['Hover-Continuous-Mix']	71.21695361978237	0.2513157894736842	1.1904901138926116	3.128824088923882	1.0	False	0.6728392128772368	0.0	0.0
cor	1	4	242	0 days 01:35:36.533512042	0 days 01:35:36.621512036	0.08799999400000001	True	10.0	69.0	0.3333333333333333	1.0	71.28099173553719	308.9400000000001	183.54	165.421039337088	180.42103933708802	2.84322567515188	-13.137274379710624	155.38761797989832	33.89669377428957	33.89669377428882	-33.896693774289524	10.033421357189713	10.033421357189713	2.9829090521374813	2.9829090521374813	['Hover-Continuous-Mix', 'Unclassified', 'Hover-Continuous-Mix']	57.55658602874366	0.20311004784688996	2.78800316302201	6.154499273533951	2.0	False	0.6094157701796011	0.0	0.0
cor	1	4	243	0 days 01:35:46.718844625	0 days 01:35:46.751511290	0.032666665000000004	True	8.0	20.0	0.0	1.0	53.47593582887701	288.5585878573226	124.56707419764946	79.79784124059395	94.79784124059395	2.5560404690640097	-21.430723679903327	18.648205671775525	0.0	3.2546275720039466	-2.1399875335833608e-13	61.149635568818404	61.149635568818404	0.0	0.0	['Hover-Continuous-Mix']	15.265475737409465	0.053869969040247684	1.5616495901779737	2.33022078977377	0.0	False	0.3098538733296841	0.0	0.0
cor	1	4	244	0 days 01:35:54.192177408	0 days 01:35:54.248177404	0.055999995999999996	False	11.0	50.0	0.42857142857142855	1.0	81.16883116883116	281.4717823455698	193.8	0.0	0.0	0.5236073807391348	-1.6179682364150556	1.4914545260687413	0.0	0.0	0.0	1.4914545260687413	1.4914545260687413	0.0	0.0	['Unclassified']	202.51821814690547	0.7146616541353383	2.215104257188319	5.495785418808845	1.0	False	0.17856482966374615	0.0	0.0
cor	1	4	245	0 days 01:35:54.372177395	0 days 01:35:54.412177392	0.039999997	True	9.0	32.0	0.25	1.0	72.72727272727272	281.5872082914267	193.80000000000004	0.0	0.0	0.5330084487902955	-1.2161390009331656	1.4914545260687408	0.0	0.0	0.0	1.4914545260687408	1.4914545260687408	0.0	0.0	['Hover']	5.9658181042749625	0.021052631578947368	1.8520914381135167	3.310424942111755	1.0	False	0.08386920265865369	0.0	0.0
cor	1	4	246	0 days 01:35:55.285510661	0 days 01:35:55.354177323	0.068666662	True	10.0	56.0	0.4	1.0	74.8663101604278	281.58	193.8	0.0	0.0	0.019086820430599925	-0.16372168158709438	21.933154795128544	416.7299411074423	-65.79946438538555	-65.79946438538555	21.933154795128544	21.933154795128544	26.846181469237337	2.9829090521374813	['Continuous']	25.968855277432194	0.091640866873065	2.411119631442583	4.268539713314194	2.0	True	0.9649088773987046	0.068	1.0	21.933154795128544	416.7299411074423	-65.79946438538555	-65.79946438538555	21.933154795128544	[21.9331548]	26.846181469237337	0.0	0.066	10.0	56.0	0.4	74.8663101604278
cor	1	4	247	0 days 01:35:55.738177294	0 days 01:35:55.810177289	0.07199999500000001	True	7.0	25.0	0.0	0.5	31.56565656565657	281.57999999999987	193.79999999999995	0.0	0.0	2.609666129791648e-05	0.021981178425587583	1.4914545260687413	0.0	0.0	0.0	1.4914545260687413	1.4914545260687413	0.0	0.0	['Hover']	2.982909052137482	0.01052631578947368	1.1747451103702895	2.7214209348747938	1.0	False	0.024774307793884263	0.0	0.0
cor	1	4	248	0 days 01:35:56.579510566	0 days 01:35:56.630843895	0.051333329	True	8.0	26.0	0.125	1.0	47.27272727272727	281.58	193.79999999999995	0.0	0.0	0.010392751095544495	0.23745428228623655	1.491454526068741	0.0	0.0	0.0	1.491454526068741	1.491454526068741	0.0	0.0	['Hover']	2.982909052137482	0.010526315789473684	2.803869449226027	5.302863126760481	1.0	False	0.017090117519622132	0.0	0.0
cor	1	4	249	0 days 01:35:57.326177177	0 days 01:35:57.386843840	0.060666662999999996	True	10.0	49.0	0.5	1.0	74.24242424242425	281.58	193.80000000000007	0.0	0.0	0.3635509425192155	0.4130329536768673	31.419975349181485	323.1484806482273	124.28787717239477	124.28787717239477	31.419975349181485	31.419975349181474	17.897454312824895	5.9658181042749625	['Continuous']	46.33452060986888	0.1635087719298246	2.3648913395595907	4.049401458239078	2.0	True	0.924347256022556	0.06	1.0	31.419975349181485	323.1484806482273	124.28787717239477	124.28787717239477	31.419975349181485	[31.41997535]	17.897454312824895	0.0	0.057999999999999996	10.0	49.0	0.5	74.24242424242425
cor	1	4	250	0 days 01:35:59.145510377	0 days 01:35:59.196843706	0.051333329	True	8.0	32.0	0.3333333333333333	1.0	58.18181818181818	281.4508196894819	193.56821556274707	0.07605693764520705	0.07605693764520705	0.5855891063759668	0.4684155321929462	1.415397588423534	0.0	-2.783642681121133	4.5474735088646405e-15	1.491454526068741	1.491454526068741	2.4424906541753444e-15	2.220446049250313e-16	['Hover']	15.391810709029405	0.05431578947368421	3.0107057763013447	6.1688884441783705	2.0	False	0.070861926451712	0.0	0.0
cor	1	4	251	0 days 01:35:59.345510362	0 days 01:35:59.403510358	0.05799999600000001	True	11.0	53.0	0.29166666666666663	1.0	83.07210031347962	280.7786165032158	192.92358539572948	0.691006091638647	0.691006091638647	0.7998166813706957	0.4049924868612367	78.47249809753427	1975.0220712174792	-1877.5460109286532	-1875.4206121980205	79.16350418917288	170.7369786675211	114.55128013060757	108.77439550748535	['Hover-Continuous-Mix', 'Unclassified']	116.53917089902644	0.4112522686025408	4.684491558767147	8.867628547459145	1.0	False	0.3842918375412001	0.0	0.0
cor	1	4	252	0 days 01:35:59.566177012	0 days 01:35:59.665510338	0.099333326	True	10.0	63.0	0.2361111111111111	1.0	57.27272727272727	280.4199887222345	192.633184061086	0.9656223724584058	0.9656223724584058	0.7881274883363395	0.31124383302312153	16.693199216195488	372.8636315171853	-104.91281012474829	-104.40181682481196	17.658821588653893	17.65882158865389	35.79490862564983	11.931636208549929	['Continuous']	26.846181469237337	0.09473684210526316	1.497601921302052	2.9696364600599123	2.0	True	0.9346046595117401	0.1	1.0	16.693199216195488	372.8636315171853	-104.91281012474829	-104.40181682481196	17.658821588653893	[17.65882159]	35.79490862564983	0.0	0.098	10.0	63.0	0.2361111111111111	57.27272727272727
cor	1	4	253	0 days 01:36:01.002843573	0 days 01:36:01.179510227	0.17666665399999998	True	11.0	140.0	0.29705882352941176	1.0	71.50153217568949	281.4327021929114	192.61522257111477	1.0273741870620048	1.0273741870620048	0.8689274588386768	-0.3897062156300488	87.8632017156952	1287.0930351754366	-0.24493722274391305	-1.2672859016863973e-11	88.89057590275719	205.40300089447024	234.80446212717567	0.0	['Unclassified', 'Hover-Continuous-Mix', 'Continuous', 'Hover-Continuous-Mix', 'Unclassified']	67.4003382454885	0.23784742755765814	2.924875868344257	8.385316150808832	5.0	True	0.9253030933275926	0.102	0.5730337078651685	95.038015549691	249.6635621513605	251.31023457628558	251.73827535403873	96.06776298575905	[222.5263706]	31.379205952072567	0.036000000000000004	0.136	11.0	83.0	0.31666666666666665	73.97504456327985
cor	1	4	254	0 days 01:36:01.528843535	0 days 01:36:01.603510196	0.07466666100000001	True	9.0	51.0	0.5	1.0	61.004784688995215	281.53992620899203	193.33729023034704	0.3106206144298331	0.3106206144298331	0.9869153986065188	-0.5040795931507919	1.1808339116389082	0.0	2.9270597926975954	4.417518982192725e-15	1.4914545260687415	1.4914545260687415	2.886579864025407e-15	2.220446049250313e-16	['Hover']	2.9829090521374826	0.01052631578947368	2.126412072047193	4.398543358041811	1.0	False	0.025081083528026214	0.0	0.0
cor	1	4	255	0 days 01:36:02.952176763	0 days 01:36:03.004176759	0.051999996000000014	True	8.0	53.0	0.6666666666666666	2.0	92.65734265734264	281.58	193.80000000000004	0.0	0.0	0.33137476620890016	-0.3240188227509386	1.491454526068741	0.0	0.0	0.0	1.491454526068741	1.491454526068741	0.0	0.0	['Hover']	6.309999917983133	0.022267206477732795	1.5342103241826872	3.836636354616348	1.0	False	0.09894622946990214	0.0	0.0
cor	1	4	256	0 days 01:36:03.630843380	0 days 01:36:03.677510043	0.046666663	True	9.0	36.0	0.3333333333333333	1.5	68.18181818181817	281.00608622763684	193.80652415344775	0.0	0.0	0.7349511112646576	-0.16512747399724698	1.4914545260687408	0.0	0.0	0.0	1.4914545260687408	1.4914545260687408	0.0	0.0	['Unclassified', 'Hover-Continuous-Mix']	189.0418611792129	0.6671052631578945	1.7353231899772132	4.041626407511952	1.0	False	0.3212224559628035	0.0	0.0
cor	1	4	257	0 days 01:36:04.965509948	0 days 01:36:05.056843275	0.09133332699999999	True	10.0	75.0	0.31666666666666665	1.0	75.75757575757576	280.54494700562213	193.81659459304527	0.0	0.0	0.5188841564762302	-0.03274669904285848	15.013975562425328	232.0040373884708	232.0040373884706	232.0040373884706	15.013975562425328	15.013975562425324	20.880363364962374	20.880363364962374	['Hover-Continuous-Mix', 'Continuous', 'Hover-Continuous-Mix', 'Unclassified']	64.36454865834433	0.22713450292397655	3.4016196525530904	7.557772822501919	1.0	True	0.8045635885123891	0.008	0.08888888888888889	11.185908945515557	1611.2959814329654	2050.749973344516	2050.749973344516	11.185908945515557	[11.18590895]	14.914545260687412	0.026000000000000002	0.032	8.0	15.0	1.0	170.45454545454544
cor	1	4	258	0 days 01:36:05.128843269	0 days 01:36:05.166843267	0.037999998	True	11.0	42.0	1.0	2.0	100.47846889952152	280.4688904350991	193.84785493887185	0.0	0.0	0.4941743602331923	-0.024045993145992296	108.6188703573865	5562.696503130857	-3556.554997501438	-3556.554997501438	108.6188703573865	126.32721812648953	163.48020807750626	135.14908990505432	['Unclassified', 'Fragmented', 'Unclassified']	230.62596829420846	0.8138504155124654	1.9570549614300397	3.3132839318529177	1.0	False	0.17719425675059228	0.0	0.0
cor	1	4	259	0 days 01:36:06.154843194	0 days 01:36:06.266843186	0.11199999199999999	True	11.0	118.0	0.6	1.0	95.77922077922076	280.65929257583053	193.8	0.0	0.0	0.15612286200710845	0.10552130059957306	41.01499946689038	585.9285638127196	585.9285638127197	585.9285638127197	41.01499946689038	41.014999466890394	65.6239991470246	65.6239991470246	['Continuous', 'Unclassified', 'Fragmented-Continuous-Mix']	60.563707005005654	0.21372180451127826	1.9114184793408868	4.576970678455553	1.0	True	0.9804446265636216	0.098	0.875	38.625628440433324	669.6244972969472	669.632644357394	669.632644357394	38.625628440433324	[38.62562844]	65.6239991470246	0.002	0.098	11.0	115.0	0.6	106.67903525046385
cor	1	4	260	0 days 01:36:06.288176517	0 days 01:36:06.380176511	0.091999994	True	10.0	91.0	0.5	2.0	89.92094861660078	280.4961083376509	193.8	0.0	0.0	0.13813037941570144	0.12822674317880806	154.7855369660929	376.75334498622567	313.9611208218525	313.9611208218525	154.7855369660929	281.2441445790497	34.66130773873252	28.884423115610534	['Hover-Continuous-Mix', 'Continuous', 'Hover-Continuous-Mix', 'Unclassified']	43.18733540703398	0.15240274599542336	1.7326889246343675	3.510351351165081	2.0	True	0.8858060390363273	0.07	0.7608695652173914	155.40807701709394	348.9501801993085	350.7394235466978	350.7394235466978	155.40807701709394	[281.86668463]	25.995980804049424	0.013999999999999999	0.08199999999999999	10.0	66.0	0.5384615384615384	85.71428571428571
cor	1	4	261	0 days 01:36:07.653509750	0 days 01:36:07.706843079	0.053333329000000006	True	10.0	36.0	0.0	1.0	62.93706293706294	281.5296346575892	193.4500866836618	0.19748455843098744	0.19748455843098744	0.236767659109406	0.3728212499663512	24.813060571029443	57.363635618028496	57.76023473794613	57.36363561802842	25.01054512946043	25.010545129460414	2.9829090521375043	2.9829090521374826	['Continuous']	24.322181502044085	0.08582995951417004	2.8692898462031318	5.6121251008211575	1.0	True	0.9271498708685454	0.052000000000000005	1.0	24.813060571029443	57.363635618028496	57.76023473794613	57.36363561802842	25.01054512946043	[25.01054513]	2.9829090521375043	0.0	0.05	10.0	36.0	0.0	62.93706293706294
cor	1	4	262	0 days 01:36:07.945509729	0 days 01:36:08.004843058	0.059333329	True	8.0	32.0	0.4	1.0	50.156739811912225	281.53082515429884	193.33574454947706	0.311771162460658	0.311771162460658	0.4270524028478491	0.4004658717508422	1.1796833636080832	0.0	-0.973735478096136	5.788473149080123e-15	1.4914545260687413	1.4914545260687413	1.1102230246251563e-15	2.220446049250313e-16	['Hover']	7.7144199624245235	0.027223230490018138	1.3960431529071584	3.2891440450513967	1.0	False	0.060979274940841176	0.0	0.0
cor	1	4	263	0 days 01:36:08.594843014	0 days 01:36:08.720176338	0.125333324	False	10.0	76.0	0.18181818181818185	1.0	54.83405483405483	280.6181836539345	193.33693771229755	0.27110081139361664	0.27110081139361664	0.7249451251842199	0.3872532197792452	1.2203537146751249	0.0	-3.1952613573994433	0.0	1.4914545260687406	1.4914545260687406	5.773159728050814e-15	0.0	['Unclassified']	225.80148047053416	0.7968253968253969	1.836824099276832	3.751431149100752	3.0	False	0.2951579850163224	0.0	0.0
cor	1	4	264	0 days 01:36:08.980842986	0 days 01:36:09.027509649	0.046666663	True	11.0	41.0	0.4166666666666666	1.5	77.65151515151516	280.53671832237325	193.26561445620283	0.3388333455899188	0.3388333455899188	0.6130739593305322	0.3348351941398902	161.91897829606316	0.0	0.4163178394254175	-6.063298011819522e-13	162.2578116416531	288.71641925460995	1.1368683772161605e-13	0.0	['Hover-Continuous-Mix']	30.077666275719608	0.10614035087719298	2.1464509939583034	4.461513668158326	1.0	False	0.5976062239385359	0.0	0.0
cor	1	4	265	0 days 01:36:10.310842888	0 days 01:36:10.428176212	0.117333324	True	10.0	71.0	0.125	1.0	54.6995377503852	280.49591354655297	192.6476576901308	0.9544465855778752	0.9544465855778752	0.4196592191270216	-0.013051071401450466	0.5370079404908661	0.0	-0.4034810931617081	0.0	1.491454526068741	1.491454526068741	1.3322676295501877e-15	0.0	['Hover']	2.9829090521374817	0.010526315789473687	2.3205831918880966	6.71824588121418	1.0	False	0.026619977940814585	0.0	0.0
cor	1	4	266	0 days 01:36:11.906842770	0 days 01:36:11.974842765	0.06799999500000001	True	10.0	35.0	0.3333333333333333	1.0	46.791443850267385	281.6302167544875	193.81167266490155	0.0	0.0	0.5973476954983641	0.02290837844370652	52.0304993595043	5411.020880375225	1803.6736267916503	1803.6736267916503	52.0304993595043	85.50483666881642	367.94941986549617	122.64980662183204	['Unclassified', 'Hover-Continuous-Mix', 'Unclassified']	140.02126021210063	0.4941176470588236	2.1016965035947592	5.0294892657522485	1.0	False	0.6019747900214526	0.0	0.0
cor	1	4	267	0 days 01:36:12.004176096	0 days 01:36:12.230842746	0.22666665000000005	True	11.0	270.0	0.5	2.0	108.6082059533387	281.25886120612864	193.4562786216319	0.18950805167070287	0.18950805167070287	0.6094993821941276	0.058519276930626175	84.60713275056945	564.2114121860966	-553.9017396105892	-551.5965850489873	84.79664080224015	159.77652319222346	134.88432703552616	123.21660706529065	['Hover-Continuous-Mix', 'Continuous', 'Fragmented-Continuous-Mix', 'Continuous', 'Hover-Continuous-Mix', 'Unclassified']	52.31969682598663	0.1846297158826269	3.8390688158176864	12.016650546410578	3.0	True	0.9755328831612068	0.132	0.584070796460177	97.20181958641498	388.4085362185274	-360.11443237803275	-358.2888359594654	97.2798409326078	[246.11189516 214.11149345]	54.440249368390404	0.006	0.138	11.0	165.0	0.4545454545454545	113.63636363636364
cor	1	4	268	0 days 01:36:12.729509376	0 days 01:36:12.915509362	0.185999986	True	10.0	233.0	0.4714285714285714	2.0	113.88074291300094	281.163933234563	193.40419602196727	0.23358730877887696	0.23358730877887696	0.024129233015821514	0.18574016119718967	61.462583563894526	904.7805251584698	-101.34146714511257	-104.24144537039551	61.696170872673406	67.34133216299598	178.0837407982706	20.880363364962374	['Continuous', 'Hover-Continuous-Mix', 'Unclassified']	41.95317247522393	0.14804753820033953	4.297441906027497	8.533103479770261	2.0	True	0.9954633882593582	0.16399999999999998	0.8817204301075269	61.49684108342857	453.77906452742525	457.25323396459396	453.96423427006584	61.76176327509242	[66.88371449]	84.24469753908612	0.0	0.162	10.0	213.0	0.4868421052631578	118.0709534368071
cor	1	4	269	0 days 01:36:15.360842516	0 days 01:36:15.433509177	0.07266666100000001	True	8.0	30.0	0.0	1.0	36.85503685503686	280.67650808386435	192.89853161355416	0.7116194996099954	0.7116194996099954	0.38966339336650796	0.05255773153640465	0.7798350264587458	0.0	-0.02988581702469048	1.5363086178596762e-15	1.4914545260687413	1.4914545260687413	0.0	0.0	['Hover-Continuous-Mix']	20.396648383534675	0.07197724039829301	1.4709182223713666	3.542854085654396	1.0	False	0.7144188832695428	0.0	0.0
cor	1	4	270	0 days 01:36:16.560842427	0 days 01:36:16.620175756	0.059333329	True	10.0	47.0	0.4	1.0	71.21212121212122	280.5573080151267	192.65267754859948	0.9520871779260972	0.9520871779260972	0.259850452489934	-0.12215657436543405	23.30890644612543	298.29090521374815	0.793155818676451	-2.1221543041368326e-13	24.26099362405152	24.260993624051515	17.89745431282495	3.552713678800501e-15	['Continuous']	29.53079961616107	0.10421052631578948	1.838726555552518	3.8827936381378882	1.0	True	0.9631881008515552	0.06	1.0	23.30890644612543	298.29090521374815	0.793155818676451	-2.1221543041368326e-13	24.26099362405152	[24.26099362]	17.89745431282495	0.0	0.057999999999999996	10.0	47.0	0.4	71.21212121212122
cor	1	4	271	0 days 01:36:17.810175669	0 days 01:36:17.891508996	0.08133332700000001	True	11.0	91.0	0.4	2.0	100.88691796008871	281.5005382164118	193.81046972850964	0.0	0.0	0.6405489149820801	0.004099241662821146	63.73070119184283	2190.1241965065606	-4.4365595208435525e-14	-4.4365595208435525e-14	63.73070119184283	72.5111889967209	233.89818803730117	0.0	['Fragmented', 'Unclassified']	219.28019227176515	0.7738125802310655	2.66081454790356	6.837561929017174	1.0	False	0.2253940436089008	0.0	0.0
cor	1	4	272	0 days 01:36:19.656175533	0 days 01:36:19.721508861	0.06533332800000001	True	10.0	46.0	0.4642857142857143	1.0	63.36088154269973	281.0779756463942	192.66000000000003	0.96729419824421	0.96729419824421	0.34169614765924605	0.3130980986830077	0.5241603278245314	0.0	0.08359550148384473	0.0	1.491454526068741	1.491454526068741	1.3322676295501877e-15	0.0	['Hover']	38.41625294419484	0.13556618819776714	1.841071815915022	4.7225113992549765	1.0	False	0.040818433569818686	0.0	0.0
cor	1	4	273	0 days 01:36:20.688175457	0 days 01:36:20.818842114	0.13066665700000002	True	9.0	116.0	0.5384615384615384	2.0	81.11888111888112	280.4267059104436	192.9831477856109	0.616276791236308	0.616276791236308	0.14975329034542426	0.4365325954610717	77.1305657567751	743.1288163340511	-702.2845956747316	-700.548772268786	77.74684254801144	90.20838100954991	96.60674612342709	91.07134039494228	['Unclassified', 'Hover-Continuous-Mix', 'Unclassified']	92.01127153131772	0.32469635627530363	2.5350556676608837	9.390684131095773	1.0	False	0.3838507028089291	0.0	0.0
cor	1	4	274	0 days 01:36:21.590842057	0 days 01:36:21.648842052	0.05799999500000001	True	8.0	33.0	0.26666666666666666	1.0	51.72413793103448	280.4400275459824	192.6507689965392	0.9489207202054344	0.9489207202054344	0.2510998235513596	0.6922564843788497	0.5425338058633068	0.0	-0.8761583604706825	0.0	1.4914545260687413	1.4914545260687413	4.440892098500626e-16	0.0	['Hover']	2.9829090521374826	0.01052631578947368	2.2439776631583244	5.829659025659393	1.0	False	0.03205168838415055	0.0	0.0
cor	1	4	275	0 days 01:36:21.666175385	0 days 01:36:21.712175381	0.045999995999999994	True	9.0	30.0	0.16666666666666666	1.0	59.28853754940711	280.43999885881914	192.59919367998847	1.0004465197741723	1.0004465197741723	0.2329122057468795	0.7153228904562631	0.4910080062945686	0.0	-0.5067627153014892	4.8270566288050404e-15	1.4914545260687408	1.4914545260687408	1.5543122344752194e-15	2.220446049250313e-16	['Hover']	2.9829090521374817	0.010526315789473686	2.6243809118663908	5.72017807429871	1.0	False	0.033073631929121224	0.0	0.0
cor	1	4	276	0 days 01:36:22.388841998	0 days 01:36:22.576175318	0.18733332000000005	True	11.0	247.0	0.5714285714285714	2.0	119.43907156673114	280.43999999999994	192.66	0.9396971656812116	0.9396971656812116	0.1828821974919302	0.8835318751886309	48.79257127711367	961.5793357660684	5.418266308434466e-13	6.966342396558599e-13	49.7322684427949	65.00933954643881	178.13408436286034	0.0	['Unclassified', 'Hover-Continuous-Mix', 'Continuous', 'Hover-Continuous-Mix', 'Unclassified']	89.01127543878337	0.3141097424412093	2.7293107705822406	9.69447104785352	4.0	True	0.9723442993932552	0.106	0.5638297872340425	53.78482983012004	444.8861622057778	350.5132550241025	350.5132550241025	54.724526995801256	[64.83461059]	41.77799573906496	0.057999999999999996	0.162	11.0	181.0	0.6363636363636364	155.23156089193827
cor	1	4	277	0 days 01:36:27.161508313	0 days 01:36:27.240841641	0.07933332800000001	True	11.0	120.0	0.6904761904761905	3.0	139.86013986013987	281.0375026561935	193.87459713400727	0.0	0.0	1.5670943330760174	1.5332936336939986	75.11986735580105	1985.6025430349491	1174.5186261760678	1174.5186261760678	75.11986735580105	172.3957193657679	206.73774013978542	91.61245284173306	['Unclassified', 'Hover-Continuous-Mix', 'Unclassified']	122.29927113763672	0.43157894736842106	3.4640179106343303	8.569494659168964	1.0	False	0.34153593626808443	0.0	0.0
cor	1	4	278	0 days 01:36:27.338174967	0 days 01:36:27.414174961	0.075999994	True	11.0	131.0	0.6318681318681318	4.0	156.69856459330146	280.8811666454653	193.554211246955	0.07102213647362657	0.07102213647362657	2.2874315310180875	1.7892199243455764	49.06847961715965	1216.7129028455522	-512.7519921232562	-510.23444312877916	49.13950175363327	49.13950175363328	92.470180616262	38.777817677787276	['Continuous', 'Hover-Continuous-Mix', 'Unclassified']	64.76052547403745	0.2285318559556787	4.725748682823125	10.854959225543137	1.0	True	0.8879304279805721	0.055999999999999994	0.7368421052631579	52.05399040400323	478.81164897042726	477.21260700438734	479.3960976649525	52.09437594625818	[52.09437595]	26.84618146923736	0.0	0.054000000000000006	11.0	112.0	0.6515151515151515	181.8181818181818
cor	1	4	279	0 days 01:36:38.564174140	0 days 01:36:38.664840799	0.100666659	True	11.0	89.0	0.30952380952380953	1.5	80.9090909090909	275.64366913318054	116.99215046169657	82.57669594811952	209.0353035610764	3.737264886829141	11.409963276901607	8.417507729276968	114.03803731920691	82.1720050901387	85.52852798940395	90.99420367739648	217.45281129035328	14.25475466490093	8.55285279894045	['Unclassified', 'Hover-Continuous-Mix', 'Unclassified']	47.01064666168671	0.16589473684210526	1.5981209666592326	4.1757404517884735	2.0	False	0.6615709797681456	0.0	0.0
cor	1	4	280	0 days 01:36:39.774174051	0 days 01:36:39.822174047	0.047999995999999996	True	9.0	41.0	0.25	2.0	77.65151515151516	275.1448155037923	126.60388357539192	82.6987731379093	209.15738075086617	2.008945340229019	-2.8453798040164457	39.198016127571	186.43181575859265	186.595522297883	-186.43181575859253	43.500757010338276	43.5007570103383	8.948727156412446	8.948727156412446	['Continuous', 'Hover-Continuous-Mix', 'Unclassified']	65.748287024197	0.2320175438596491	1.3465143432646869	2.3508172022211853	0.0	True	0.8036453553338665	0.006	0.125	34.4725026715408	386.0194935971684	497.2301765140799	-497.15150868958153	48.2236963428893	[48.22369634]	2.9829090521374866	0.0	0.004	3.0	3.0		45.45454545454545
cor	1	4	281	0 days 01:37:04.647505552	0 days 01:37:04.732838879	0.08533332699999999	True	11.0	64.0	0.29166666666666663	1.0	69.26406926406926	291.00043041655607	171.64738940121381	22.389453850884024	22.389453850884024	2.2805843528371534	16.10198820977564	8.860069552461031	53.26623307388361	56.85138295822868	53.26623307388364	31.24952340334506	31.249523403345044	2.9829090521375505	2.9829090521374866	['Hover-Continuous-Mix']	39.55905576287089	0.13959899749373433	1.2110174417429445	3.488265509557668	1.0	False	0.6026783758432366	0.0	0.0
cor	1	4	282	0 days 01:37:17.397504613	0 days 01:37:17.456171275	0.058666662	True	9.0	35.0	0.3333333333333333	1.0	54.858934169279	248.99032068913434	192.66916092082482	180.77933711510136	307.2379447280583	0.2062342695963718	1.3327064142306857	1.1908716040820428	0.0	0.21105144772441126	-5.01790180288512e-13	179.58846551101936	306.04707312397625	0.0	0.0	['Hover']	8.022996760921504	0.028312159709618867	1.4838460743762412	2.7683242351459296	1.0	False	0.08692541964662763	0.0	0.0
cor	1	4	283	0 days 01:37:19.662837779	0 days 01:37:19.734837774	0.07199999500000001	True	10.0	49.0	0.3	1.0	61.868686868686865	248.34193378993615	193.67417068767384	181.03268666680813	307.49129427976504	0.3696432156619925	0.10171678107321706	12.436348841451625	361.05528894513276	361.0552889451326	-361.05528894513316	168.5963378253565	295.0549454383134	25.995980804049513	25.995980804049513	['Hover-Continuous-Mix', 'Unclassified', 'Hover-Continuous-Mix', 'Continuous']	42.42359540817753	0.14970760233918126	1.5864201369938964	3.6504009240752673	1.0	True	0.8386257726175211	0.027999999999999997	0.3888888888888889	25.377028880151748	308.89118793043036	309.47596195297155	-309.47596195297183	155.6556577866563	[282.1142654]	8.665326934683236	0.044000000000000004	0.07	7.0	27.0	0.4166666666666666	87.66233766233766
cor	1	4	284	0 days 01:37:21.660837632	0 days 01:37:21.920837613	0.259999981	True	11.0	438.0	0.6511627906976745	3.0	153.14685314685315	248.52000000014905	193.79999999992555	181.0326866668081	307.49129427976504	0.0703044760796566	0.0051460437047213545	105.80950227795459	765.7226647182785	723.1426206529788	-84.67075786687542	121.7086950020923	186.4363814755654	196.3201899625037	22.014397045387454	['Hover-Continuous-Mix', 'Unclassified', 'Fragmented-Continuous-Mix', 'Continuous', 'Hover-Continuous-Mix', 'Unclassified', 'Hover-Continuous-Mix', 'Unclassified']	73.4713444995709	0.25927125506072873	4.143822917115436	12.001328651555164	3.0	True	0.9784920993997652	0.11599999999999999	0.4461538461538462	105.71913859976324	545.7470993867263	498.0549734516566	-92.44334679550072	91.82432722269493	[160.6319309]	61.986300940417614	0.06	0.174	11.0	260.0	0.7357549857549857	203.76175548589345
cor	1	4	285	0 days 01:37:23.524837495	0 days 01:37:23.602837489	0.077999994	True	10.0	82.0	0.4142857142857143	2.0	95.57109557109557	248.83515699765246	193.0769580819351	181.03268666680813	307.49129427976516	0.35988178928241626	-0.0007917807876695477	41.68370302311036	2283.2950126276546	2283.295012627569	-2283.295012627569	139.3489836436977	259.32253445599014	178.09701098495063	178.09701098495063	['Hover-Continuous-Mix', 'Unclassified', 'Hover-Continuous-Mix', 'Unclassified']	116.10399849088968	0.40971659919028336	1.8663267555953225	3.719053608053192	1.0	False	0.5170463162132337	0.0	0.0
cor	1	4	286	0 days 01:37:24.595504082	0 days 01:37:24.744170738	0.148666656	True	11.0	168.0	0.4117647058823529	2.0	103.1941031941032	248.52000000001618	193.79999999741867	181.0326866668081	307.49129427976493	0.1542395703729911	-0.004179019687993528	132.71724159286327	38.154094683201826	18.700695028663077	18.70069502866298	100.83000753293196	115.83000753293192	8.525909161985524	2.7677028642421675	['Hover-Continuous-Mix', 'Unclassified']	70.62238728844417	0.24921763869132285	3.217687369513609	5.276888155652196	3.0	False	0.6462565235176403	0.0	0.0
cor	1	4	287	0 days 01:37:25.187504039	0 days 01:37:25.376170692	0.188666653	True	11.0	283.0	0.6666666666666666	3.0	136.8471953578337	248.52	193.79999999999995	181.0326866668081	307.49129427976493	0.0035558914448223368	-0.008480399100229059	98.96395247071851	1207.5760211092895	-349.06382525012987	349.06382525012987	82.06873419608962	157.40577702934053	227.02429196853345	65.6239991470246	['Hover-Continuous-Mix', 'Unclassified', 'Hover-Continuous-Mix', 'Unclassified', 'Fragmented-Continuous-Mix', 'Continuous', 'Hover-Continuous-Mix', 'Unclassified']	51.94704381222401	0.1833146696528556	4.439426359714772	12.033952192515542	3.0	True	0.9728083222110028	0.094	0.5	95.76748882822244	484.6034524012434	474.4108246408642	-474.4108246408644	85.26519783858562	[171.36467536]	46.0388386720218	0.08199999999999999	0.174	11.0	178.0	0.6428571428571429	172.147001934236
cor	1	4	288	0 days 01:37:25.436170687	0 days 01:37:25.483504017	0.04733333	False	11.0	50.0	0.1	2.0	94.6969696969697	248.52	193.80000000000004	181.0326866668081	307.49129427976504	0.00039433261568647647	-0.010221143988076165	116.52727841433502	62.143938586197535	62.14393858619769	-62.143938586197606	64.50540825247306	64.50540825247307	2.9829090521374866	2.9829090521374866	['Unclassified']	220.73526985817367	0.7789473684210527	4.034388586034891	6.316437349400271	1.0	False	0.22715685826781956	0.0	0.0
cor	1	4	289	0 days 01:37:26.346837287	0 days 01:37:26.460837278	0.113999991	True	11.0	132.0	0.4615384615384616	2.0	105.26315789473685	248.51999998282488	193.79999978195949	181.0326866668081	307.49129427976493	0.27431824353825457	-0.02459537982327961	66.8158979506324	1764.1300090438015	-853.6346904183628	853.6346904183632	114.21678871617573	229.58253601220656	201.11082103098687	97.31435470769337	['Unclassified', 'Continuous', 'Unclassified']	73.52609154830108	0.25946445060018464	3.3288739509726715	8.129076617115292	2.0	True	0.9465421064548599	0.08199999999999999	0.7192982456140351	59.83339934128628	592.031979492752	597.6803762205567	-597.6803762205562	121.19928732552185	[247.65789494]	49.00979085008564	0.027999999999999997	0.10800000000000001	11.0	109.0	0.4545454545454545	120.84257206208427
cor	1	4	290	0 days 01:37:27.800170513	0 days 01:37:27.883503840	0.083333327	True	11.0	119.0	0.4615384615384616	3.0	128.78787878787878	248.477721716338	193.59941963822303	181.0326866668081	307.49129427976504	0.5204406866968947	-0.05562043032978993	67.84447355059595	1253.5348160350675	1253.5348160350634	-1253.5348160350634	113.18821311621213	239.64682072916898	83.63360721023741	83.63360721023741	['Unclassified', 'Fragmented-Continuous-Mix', 'Continuous', 'Hover-Continuous-Mix']	55.60994732913447	0.19624060150375944	3.311269624653432	7.432526132441138	1.0	True	0.9153629307020584	0.06	0.7142857142857143	71.60400108016728	524.8354850272386	527.9856163453225	-527.985616345323	109.42868558664075	[235.8872932]	31.679136980719328	0.013999999999999999	0.07200000000000001	11.0	99.0	0.5277777777777778	150.0
cor	1	4	291	0 days 01:37:27.948170502	0 days 01:37:28.005503831	0.057333329	True	10.0	99.0	0.7083333333333333	3.0	155.17241379310346	248.5072877197721	193.74479459228024	181.03268666680813	307.49129427976504	0.5190979312529593	-0.057192491422499415	129.98543470942664	0.0	-1.2544754507212806e-13	-2.508950901442561e-13	98.09820064949541	113.09820064949537	0.0	0.0	['Hover-Continuous-Mix', 'Unclassified']	50.50373602067254	0.1782214156079855	2.093290800054643	3.3688801964420665	1.0	False	0.3675997181064635	0.0	0.0
cor	1	4	292	0 days 01:37:28.386837136	0 days 01:37:28.420170467	0.033333331	True	6.0	19.0	0.0	1.0	50.80213903743316	248.52	193.8	181.0326866668081	307.49129427976504	0.08109665732699309	-0.057951123319058113	1.4442211557887221	0.0	-6.6874610424480024e-15	-8.559950134333443e-13	179.58846551101936	306.04707312397625	0.0	0.0	['Hover']	7.369540011163191	0.026006191950464396	3.0234465190571056	5.7978776868517095	1.0	False	0.16618936025265355	0.0	0.0
cor	1	4	293	0 days 01:37:28.802170439	0 days 01:37:28.872837101	0.070666662	True	9.0	50.0	0.3333333333333333	1.0	64.93506493506493	248.50063851859773	193.6830325217271	181.03268666680813	307.49129427976504	0.8165428352448681	-0.05101664163638426	27.522728883025664	206.31730796864727	206.3173079686477	-206.31730796864701	153.50995778378245	279.96856539673934	14.442211557805335	14.442211557805335	['Continuous']	27.35753730674661	0.09654135338345864	1.924163916319132	4.0520330327478815	1.0	True	0.9518902073195808	0.07	1.0	27.522728883025664	206.31730796864727	206.3173079686477	-206.31730796864701	153.50995778378245	[279.9685654]	14.442211557805335	0.0	0.068	9.0	50.0	0.3333333333333333	64.93506493506493
cor	1	4	294	0 days 01:37:30.151503673	0 days 01:37:30.367503657	0.21599998399999998	True	11.0	256.0	0.4545454545454545	2.0	107.74410774410774	249.15706535302456	193.09104018580436	181.0319710879037	307.4905787008607	0.7254622162746512	-0.002870938148349625	78.9923666368074	2426.4114135477803	-173.68513915335504	173.7980426187419	102.03960445109631	178.14895162556115	795.9094973996521	0.0	['Hover-Continuous-Mix', 'Unclassified', 'Fragmented-Continuous-Mix', 'Continuous', 'Hover-Continuous-Mix', 'Unclassified', 'Fragmented-Continuous-Mix', 'Fragmented']	101.36366871615331	0.3576998050682261	3.420263589583562	9.513273482538672	5.0	True	0.927989992214153	0.096	0.4444444444444444	95.99080499801579	928.1225180532707	921.7505482616216	-921.750548261622	85.04188166879231	[161.4439571]	89.9322737888962	0.064	0.158	11.0	163.0	0.5714285714285714	154.3560606060606
cor	1	4	295	0 days 01:37:31.813503551	0 days 01:37:31.870170213	0.05666666200000001	True	9.0	57.0	0.625	1.5	92.53246753246755	248.8449076424433	193.6541394514801	181.03268666680813	307.49129427976504	0.4424626677851173	-0.09073664137915216	109.57454925379444	3180.303767588518	3180.3037675884084	-3180.30376758841	71.45813741301362	121.13830468953238	178.09701098495063	178.09701098495063	['Hover-Continuous-Mix', 'Unclassified', 'Hover-Continuous-Mix']	135.93542680455096	0.4796992481203008	2.6652754701031958	5.433690257035053	1.0	False	0.28409667074879463	0.0	0.0
cor	1	4	296	0 days 01:37:33.437503431	0 days 01:37:33.576836754	0.139333323	True	11.0	207.0	0.625	3.0	136.36363636363637	248.5224032855273	192.6640211486898	180.80722963839733	307.2658372513542	0.8201743386089646	-0.3634454067653421	48.87617008099447	2173.461678856368	-516.5176391792019	515.5873273887706	131.93105955740276	256.55693372669367	290.3061065845621	0.0	['Hover-Continuous-Mix', 'Unclassified', 'Fragmented-Continuous-Mix', 'Unclassified', 'Hover-Continuous-Mix', 'Unclassified', 'Fragmented-Continuous-Mix', 'Unclassified']	104.48827795675787	0.3687261632341723	5.4359369166152005	11.83740360140836	1.0	False	0.6885322055291562	0.0	0.0
cor	1	4	297	0 days 01:37:41.922169473	0 days 01:37:41.962169470	0.039999997	True	8.0	32.0	0.0	1.5	72.72727272727272	249.64965200425513	193.8178327742438	181.03268666680816	307.49129427976493	0.5596484269470103	0.15784415772088778	1.4442211557887217	0.0	-5.6843418860808026e-15	-7.275957614183427e-13	179.58846551101936	306.0470731239763	0.0	0.0	['Hover']	15.511127071114904	0.05473684210526315	1.9387933594429267	3.785671789090429	1.0	False	0.15531287748687206	0.0	0.0
cor	1	4	298	0 days 01:37:42.156169455	0 days 01:37:42.218169451	0.061999995999999995	False	10.0	55.0	0.6	2.0	80.64516129032258	249.66	193.80000000000004	181.03268666680816	307.49129427976504	0.2538630907265447	0.08452246971829379	1.4442211557887226	0.0	-5.500976018787872e-15	-7.041249304048476e-13	179.58846551101936	306.0470731239763	0.0	0.0	['Unclassified']	206.87917619663185	0.730050933786078	1.863095835537764	4.802905871065121	1.0	False	0.4388657510850169	0.0	0.0
cor	1	4	299	0 days 01:37:43.016836059	0 days 01:37:43.125502717	0.108666658	True	11.0	161.0	0.5833333333333334	3.0	133.05785123966942	249.46484045020168	194.38499660168773	181.03268666680802	307.49129427976504	0.5056968909598785	-0.10339738433577332	68.55755557606244	2048.4428442937906	2048.4428442937005	-2048.4428442937	112.47513109074563	236.63449129255775	178.09701098495063	178.09701098495063	['Unclassified', 'Hover-Continuous-Mix', 'Unclassified', 'Hover-Continuous-Mix', 'Unclassified']	88.67375091354151	0.3129186602870813	2.880651142425108	8.336237164338499	2.0	False	0.7548308091917547	0.0	0.0
cor	1	4	300	0 days 01:37:43.884835995	0 days 01:37:43.985502654	0.100666659	True	11.0	126.0	0.5	2.0	112.29946524064172	248.914472695137	192.71063279287227	180.82605795785733	307.2846655708141	0.7790781863902859	-0.2051674569283999	60.55255338943823	819.9373255905655	820.5870344597821	-819.9373255905629	120.27350456841907	246.73211218137592	83.63360721023741	83.63360721023741	['Unclassified', 'Fragmented-Continuous-Mix', 'Continuous', 'Hover-Continuous-Mix', 'Unclassified']	74.57272630343704	0.2631578947368421	3.946374904397492	10.583138502015897	1.0	True	0.9187182575667492	0.07200000000000001	0.7058823529411765	64.58967763129503	629.0685076766076	620.6377974565486	-619.994944502267	116.2339257758778	[242.69253339]	46.083857159943705	0.016	0.086	11.0	109.0	0.5714285714285714	137.62626262626262
cor	1	4	301	0 days 01:38:08.028834216	0 days 01:38:08.083500879	0.054666663	True	9.0	35.0	0.2	1.0	56.81818181818181	256.43095359798286	117.5920091832701	101.75118419537253	228.20979180832938	3.901341858465272	-2.5754974904262133	5.796325894590606	0.0	-4.349609949073018	0.0	95.95485830078192	222.41346591373886	0.0	0.0	['Hover']	8.948727156412446	0.03157894736842105	1.2382079033476483	3.8040923067117034	1.0	False	0.06299377230706044	0.0	0.0
cor	1	4	302	0 days 01:38:19.211500059	0 days 01:38:19.254166723	0.04266666400000001	True	9.0	45.0	0.5	2.0	97.40259740259741	241.8152755972652	190.1555904367398	178.77835355393748	305.2369611668944	0.3004977203205016	-0.4635967742854876	26.42377269477951	550.1794879163926	344.66002962157694	-343.8621799477488	152.35458085915795	278.81318847211486	20.219096180927323	14.442211557805335	['Fragmented-Continuous-Mix', 'Continuous', 'Hover-Continuous-Mix']	66.33421558800971	0.23408521303258145	2.8949935934410584	5.2361749583392045	1.0	True	0.8464465055136415	0.026000000000000002	0.6190476190476191	26.964607841724273	446.70769009830605	445.2047364474117	-444.3757402401629	151.81498174600927	[278.27358936]	11.5537692462442	0.008	0.032	8.0	37.0	0.6	129.37062937062942
cor	1	4	303	0 days 01:38:19.871500011	0 days 01:38:20.018166667	0.146666656	True	11.0	258.0	0.6470588235294118	3.0	160.6475716064757	241.589428958403	189.25257619689688	177.8935277825993	304.35213539555616	1.3687051635502925	-0.04316118168694411	91.72342474980681	1633.4492772206445	-332.80443633726435	356.1093260828688	86.39543897999279	145.29396855315076	250.32076394217475	51.99196160809896	['Unclassified', 'Hover-Continuous-Mix', 'Continuous', 'Hover-Continuous-Mix', 'Unclassified']	81.56008860364948	0.28781542898341744	3.4751508381909417	9.773146720651887	2.0	True	0.8897445410920856	0.10800000000000001	0.7397260273972602	94.90401545273788	878.2261736712468	795.3674059360206	-794.3383685435871	82.98021176061934	[141.52586343]	102.05284347859892	0.008	0.114	11.0	221.0	0.6666666666666666	186.02693602693603
cor	2	2	1	0 days 00:23:42.846199936	0 days 00:23:42.900866598	0.054666662000000005	True	4.0	12.0	0.25	0.0	19.48051948051948	278.5405207472493	199.5080769340049	0.0	0.0	0.8490650481898477		1.4831968048106694	0.0	-2.0301221021717147e-15	-2.0301221021717147e-15	1.4831968048106694	1.4831968048106694	0.0	0.0	['Hover']	2.966393609621339	0.009523809523809526	2.304841486971218	3.764695385595156	2.0	False	0.015417926682739787	0.0	0.0
cor	2	2	2	0 days 00:23:44.577533141	0 days 00:23:44.610199805	0.032666664000000005	True	5.0	10.0	0.6666666666666666	0.5	28.40909090909091	278.4696303036077	199.50000000000003	0.0	0.0	0.5807380542097296		1.4831968048106698	0.0	0.0	0.0	1.4831968048106698	1.4831968048106698	0.0	0.0	['Hover']	2.9663936096213392	0.009523809523809523	2.3201836826163387	3.4070135325084148	1.0	False	0.021881405506433745	0.0	0.0
cor	2	2	3	0 days 00:23:44.708866464	0 days 00:23:44.772199793	0.06333332900000001	True	4.0	10.0	0.5	0.0	14.66275659824047	278.9091094766973	199.5	0.0	0.0	0.5213079709043072		1.4831968048106692	0.0	-3.667317345858581e-15	-3.667317345858581e-15	1.4831968048106692	1.4831968048106692	0.0	0.0	['Hover']	2.9663936096213384	0.009523809523809528	1.5624964863622073	3.0711500146979014	1.0	False	0.017426674191840723	0.0	0.0
cor	2	2	4	0 days 00:23:47.391532932	0 days 00:23:47.435532928	0.043999996	True	6.0	12.0	0.0	0.0	24.793388429752067	278.4190019568188	199.5	0.0	0.0	0.15555155898871506		1.48319680481067	0.0	-2.5837917664003644e-15	-2.5837917664003644e-15	1.48319680481067	1.48319680481067	0.0	0.0	['Hover']	2.96639360962134	0.009523809523809523	1.874584599395732	4.608136774729101	1.0	False	0.02678437444466885	0.0	0.0
cor	2	2	5	0 days 00:23:48.894199487	0 days 00:23:48.983532814	0.08933332699999999	True	7.0	24.0	0.0	0.0	24.24242424242424	278.16	199.5	0.0	0.0	0.06922858665528575	0.0	1.4831968048106698	0.0	-1.2631870857957337e-15	-1.2631870857957337e-15	1.4831968048106698	1.4831968048106698	0.0	0.0	['Hover']	2.966393609621339	0.009523809523809526	1.4482173344937286	5.244108333505814	1.0	False	0.03106263977391862	0.0	0.0
cor	2	2	6	0 days 00:23:59.590865359	0 days 00:23:59.738198682	0.14733332300000002	True	11.0	77.0	0.4147727272727273	1.0	47.94520547945205	278.25169965130556	199.5006557267369	0.0	0.0	0.7524994451807194	0.0251449433898876	5.465478636905072	284.4487022924572	1.2458831531136004e-14	1.2458831531136004e-14	5.465478636905072	5.465478636905072	41.52951053469876	0.0	['Hover-Continuous-Mix', 'Unclassified', 'Fragmented-Continuous-Mix', 'Unclassified', 'Hover-Continuous-Mix']	112.76359269450981	0.3620352250489237	1.1873313764430649	3.2009139238055817	1.0	False	0.5858896995575593	0.0	0.0
cor	2	2	7	0 days 00:24:02.194198499	0 days 00:24:02.283531826	0.08933332699999999	True	7.0	17.0	0.0	0.0	17.17171717171717	277.90834399646883	199.8948066799519	0.0	0.0	1.6168520259811112	2.332802264637096	189.60300406644555	0.0	-1.6168794698185392e-13	-1.6168794698185392e-13	189.60300406644555	204.60300406644558	0.0	0.0	['Hover-Continuous-Mix']	17.33692265178694	0.05566137566137564	1.7499620709573422	4.805459958151144	1.0	False	0.34017319573725063	0.0	0.0
cor	2	2	8	0 days 00:24:15.834197487	0 days 00:24:15.890197483	0.055999995999999996	True	8.0	28.0	0.5	1.0	45.45454545454545	285.76530016417763	122.63368233632283	75.31049897691727	75.31049897691727	2.8353042256499235	13.030278524065812	0.3325380684269127	0.0	-3.733355688662305	1.2383744823247434e-13	75.64303704534416	75.64303704534414	1.9895196601282808e-13	0.0	['Hover']	11.865574438485355	0.038095238095238106	1.683464532391314	4.532640173246794	1.0	False	0.08829559430984177	0.0	0.0
cor	2	2	9	0 days 00:24:15.979530809	0 days 00:24:16.069530803	0.089999994	True	8.0	34.0	0.0	0.0	34.34343434343434	286.10970153249326	121.72637046548536	76.23008719208413	76.23008719208413	2.4862759548967057	13.134505406072115	0.5870501467399662	0.0	7.9210300087098355	0.0	75.64303704534416	75.64303704534414	0.0	0.0	['Hover']	13.51357088827499	0.0433862433862434	1.7348542632424986	3.8336713707328354	1.0	False	0.10802677084792207	0.0	0.0
cor	2	2	10	0 days 00:24:16.080864135	0 days 00:24:16.206864126	0.125999991	True	8.0	42.0	0.0	1.0	30.303030303030305	285.5139651820746	120.71057082539862	77.2228333138072	77.2228333138072	2.092720535338354	13.412450934728513	1.5797962684630242	0.0	7.089864618056053	0.0	75.64303704534422	75.6430370453442	0.0	0.0	['Hover']	16.903735013556524	0.05427059712773996	1.1853132292179778	2.8533302024158265	1.0	False	0.15282206379348304	0.0	0.0
cor	2	2	11	0 days 00:24:23.521530249	0 days 00:24:23.584863578	0.06333332900000001	True	6.0	26.0	0.25	1.0	36.93181818181819	290.0785289236628	124.17765437279293	73.92935155713742	73.92935155713742	1.3775862048887744	-8.731375740418823	16.225712668580492	0.0	2.5134348208326167	-3.357314426466473e-13	90.15506422571792	105.15506422571795	1.4210854715202006e-13	0.0	['Hover-Continuous-Mix']	41.344110934097415	0.1327380952380952	1.578024579514942	3.1608475767212734	2.0	False	0.5151036281878556	0.0	0.0
cor	2	2	12	0 days 00:24:24.650196832	0 days 00:24:24.708863495	0.058666663	False	6.0	18.0	0.125	0.0	27.27272727272727	290.09183021295405	121.94135492404457	96.10877276224166	111.10877276224166	0.6493832281543039	1.898754732887653	96.48580243529099	0.0	0.8636058912122716	-2.425319204727809e-13	192.59457519753258	207.59457519753258	0.0	0.0	['Unclassified']	224.06159731339847	0.7193650793650795	1.5656006325038585	3.3283314628017764	1.0	False	0.3564932046779247	0.0	0.0
cor	2	2	13	0 days 00:24:25.612196761	0 days 00:24:25.658196758	0.045999997	False	7.0	16.0	0.0	1.0	31.620553359683797	290.60195996618177	121.62088977684073	96.59123121257568	111.59123121257565	0.3924295859081947	-5.183548884107156	85.83128920543099	2477.9379248384216	-1696.1775330546338	-2477.9379248384125	177.72694764850212	190.7704259093717	113.9851445425671	113.9851445425671	['Unclassified']	175.53311750846277	0.5635610766045549	2.5378484248520765	3.8200359541591884	2.0	False	0.40682221217566944	0.0	0.0
cor	2	2	14	0 days 00:24:25.905530073	0 days 00:24:25.958196735	0.052666662	True	6.0	15.0	0.2857142857142857	0.5	26.223776223776227	290.2640912148172	121.294558990848	96.22800899650377	111.22800899650377	0.2676349737621765	-8.152757161424299	17.61857834153827	0.0	-0.12641065677385654	0.0	78.60943065496552	78.60943065496552	0.0	0.0	['Hover']	36.05309156309012	0.11575091575091576	1.155878875828212	2.4092107545801698	0.0	False	0.14799544018883595	0.0	0.0
cor	2	2	15	0 days 00:24:26.538196692	0 days 00:24:26.584196689	0.045999997	True	8.0	34.0	0.0	1.0	67.19367588932806	290.22016183269386	122.35782012278187	75.75321689512866	75.75321689512866	1.6501304332922389	-12.696217051287592	30.03206321639977	64.48681760046392	62.979130021124114	-64.48681760046408	45.72115367872888	45.721153678728896	2.966393609621342	2.966393609621342	['Unclassified', 'Hover-Continuous-Mix']	55.071742230796154	0.17681159420289855	1.935461044363077	4.52680688606255	1.0	False	0.5042708281859483	0.0	0.0
cor	2	2	16	0 days 00:24:42.201528863	0 days 00:24:42.244862193	0.04333333	True	3.0	12.0	0.7142857142857143	0.0	24.793388429752067	285.6409055292807	108.52111316599493	90.58408478663145	105.58408478663145	1.3532691704835529	0.5996990756348711	11.199570815013615	267.24835187669015	-267.06575103162413	267.2483518766909	79.38451397161784	84.15724124434512	11.758927482574382	11.758927482574382	['Hover-Continuous-Mix']	44.36106807115549	0.1424242424242424	1.3998662144119702	3.0019472703166743	1.0	False	0.7228532911205945	0.0	0.0
cor	2	2	17	0 days 00:24:42.344862185	0 days 00:24:42.428862179	0.08399999400000001	True	6.0	28.0	0.16666666666666666	1.0	30.303030303030305	285.72609466565086	108.7979242481993	90.69144357831316	105.69144357831313	1.3650743427331429	0.822296553177385	3.832998133479627	33.96994269035222	35.02439035976353	1.1949462897288563	87.42108366855422	125.86202577977522	0.1003754883372352	0.1003754883372352	['Hover-Continuous-Mix']	71.61721714657234	0.2299319727891156	1.9605155707249875	3.5470555523117584	3.0	False	0.6164888723482479	0.0	0.0
cor	2	2	18	0 days 00:24:43.024195468	0 days 00:24:43.072862131	0.048666663000000006	True	8.0	28.0	0.25	1.0	50.90909090909091	286.0742174325111	109.59724058072514	91.10324672146184	106.10324672146184	2.055424676054224	1.5800644759258375	23.17283306113317	1186.5574438485364	-0.09525202747297498	1.6007106751203535e-12	67.93041366032868	67.93041366032868	59.32787219242685	0.0	['Unclassified', 'Hover-Continuous-Mix']	72.61731556353041	0.2331428571428571	2.123007179542464	5.380340700519054	1.0	False	0.5533322351875092	0.0	0.0
cor	2	2	19	0 days 00:24:47.520861801	0 days 00:24:47.550195132	0.029333331	True	4.0	9.0	0.5	1.0	29.220779220779217	267.1740296927814	105.95428937415184	99.95677461920559	238.02172070311585	2.8806816726553466	14.815880741920244	2.3148187679492827	0.0	-2.609912864345432	-2.476748964649496e-13	102.27159338715492	240.3365394710651	5.684341886080803e-14	0.0	['Hover-Continuous-Mix']	23.94303413480081	0.07687074829931971	2.5278218492292512	3.895199001972873	1.0	False	0.3486935811127804	0.0	0.0
cor	2	2	20	0 days 00:24:50.444861584	0 days 00:24:50.476861582	0.031999997999999995	True	2.0	5.0	0.75	0.0	14.204545454545453	252.79319022318802	110.74962982986577	114.0496785634615	252.11462464737176	0.7062565172064598	10.376485248197119	2.2315706565925106	553.8470014087152	2.0401670579608147	0.0	111.87160807823929	249.93655416214958	17.72310404507897	0.0	['Hover-Continuous-Mix']	60.25487019543346	0.19345238095238093	2.565914135326382	4.640575717435485	1.0	False	0.6066496917162482	0.0	0.0
cor	2	2	21	0 days 00:24:51.516861505	0 days 00:24:51.632861496	0.115999991	True	7.0	36.0	0.125	0.0	28.21316614420063	250.12465797988412	115.12034733548323	120.62087606908531	258.6858221529956	2.5905326157101443	6.1561582757021664	14.682433569155476	25.464229949825977	26.89395334157025	-25.46422994982603	105.93844249992986	244.0033885838401	2.9538506741798045	2.9538506741798045	['Hover-Continuous-Mix']	87.55975620123674	0.2811165845648604	1.6859553584333948	3.8665390266978026	3.0	False	0.5350522599222584	0.0	0.0
cor	2	2	22	0 days 00:24:53.834194666	0 days 00:24:53.878194663	0.043999997000000006	False	8.0	22.0	0.4166666666666666	0.5	45.45454545454545	247.91399588106532	119.68699226231094	125.23386313523355	263.29880921914383	2.9291147937528152	-1.476011850041849	74.83223677311776	0.0	-4.605294411297941	-9.921760382977398e-13	200.06609990835125	338.13104599226165	3.126388037344441e-13	2.8421709430404014e-14	['Unclassified']	188.50083028411962	0.6051948051948051	1.385737861867442	3.735328264663373	1.0	False	0.3702595831948045	0.0	0.0
cor	2	2	23	0 days 00:24:54.119527978	0 days 00:24:54.202861305	0.083333327	True	8.0	27.0	0.16666666666666666	0.0	29.220779220779217	247.45312154610832	119.74265412768179	125.29939231772688	263.3643384016372	3.4178343348800784	-2.566715676485793	33.858584735898	105.49466693499336	-38.80315038165181	35.16488897833066	91.44080758182886	229.5057536657391	8.861552022539428	2.9538506741798187	['Unclassified', 'Hover-Continuous-Mix']	119.92705593183416	0.38503401360544215	1.3746701139613715	3.9621937316668583	1.0	False	0.4240333392406633	0.0	0.0
cor	2	2	24	0 days 00:25:00.903527474	0 days 00:25:00.980860802	0.07733332799999999	True	6.0	17.0	0.25	0.0	19.81351981351981	253.39052288413487	131.08182042163455	136.508668172244	274.5736142561543	1.9858875389300152	16.10096697389561	52.68580643363646	190.06337941382674	-191.26585256258838	-190.06337941382682	189.19447460588052	327.2594206897906	14.824943594278974	14.824943594278464	['Hover-Continuous-Mix']	31.489409086749593	0.1010989010989011	1.5132299085396943	5.591673582036767	1.0	False	0.6126616041175661	0.0	0.0
cor	2	2	25	0 days 00:25:10.715526746	0 days 00:25:10.762193409	0.046666663	True	6.0	8.0	0.0	0.0	15.810276679841895	248.77905238973716	199.5	201.54859426761425	339.6135403515245	0.08659393326751966	0.0040880494731996096	198.15977105847213	0.0	-6.326919664507327e-13	-3.1634598322536633e-13	168.662006148836	183.66200614883599	0.0	0.0	['Hover']	27.987278838601327	0.0898550724637681	1.7792171735751252	4.268961605052641	1.0	False	0.19556791436528104	0.0	0.0
cor	2	2	26	0 days 00:25:11.888859992	0 days 00:25:11.974193319	0.08533332699999999	True	10.0	45.0	0.3	1.0	48.701298701298704	249.61239531277585	199.49999999999997	201.54859426761428	339.61354035152465	0.2714876801457441	0.0	194.2032386628376	282.51367710679426	247.19946746844496	-247.19946746844548	7.3453556047766515	7.3453556047766515	26.69754248659207	20.76475526734938	['Unclassified', 'Hover-Continuous-Mix']	46.89727039972783	0.15056689342403629	2.5075675443791274	5.983557422668477	2.0	False	0.7456317414124188	0.0	0.0
cor	2	2	27	0 days 00:25:14.512859797	0 days 00:25:14.574193126	0.06133332900000001	True	11.0	39.0	0.3333333333333333	1.0	59.09090909090909	249.6599999999999	199.49999999999997	201.54859426761425	339.6135403515247	0.01534940473239988	-0.02353345871739521	193.24269216067447	296.639360962134	296.63936096213337	-296.63936096213365	8.30590210693975	8.30590210693975	17.798361657728034	17.798361657728034	['Unclassified', 'Hover-Continuous-Mix']	47.16565839297929	0.15142857142857138	2.154469165607039	4.591817377896652	1.0	False	0.7778657455983606	0.0	0.0
cor	2	2	28	0 days 00:25:16.772859630	0 days 00:25:16.822859626	0.049999996000000005	True	8.0	23.0	0.125	1.0	41.81818181818182	248.52640380187242	200.2579280167287	201.54859426761425	339.61354035152465	1.2038744054143864	-0.2435343924969402	1.4824943592629218	0.0	-2.273736754432321e-15	-2.9103830456733704e-13	200.06609990835133	338.13104599226165	0.0	0.0	['Hover']	10.679016994636822	0.03428571428571428	1.6395469264759333	3.5103068937780844	1.0	False	0.10178992910442876	0.0	0.0
cor	2	2	29	0 days 00:25:48.782190587	0 days 00:25:48.810857251	0.028666663999999998	True	5.0	10.0	0.0	1.0	30.303030303030305	259.0728590584039	110.6144679731177	107.78715802555479	245.85210410946502	0.9385433830911964	-0.3911672214442774	4.137100990449312	98.46168913932712	100.26971877532112	-98.46168913932779	103.65005703510552	241.71500311901562	2.9538506741798187	2.9538506741798187	['Hover-Continuous-Mix']	51.219729659461784	0.16444444444444448	2.751331509610605	4.9196397245804695	1.0	False	0.4805685481151111	0.0	0.0
cor	2	2	30	0 days 00:25:51.922857020	0 days 00:25:51.996857015	0.073999995	True	10.0	70.0	0.5	2.0	85.995085995086	257.642078997468	108.95820270424582	109.30755089142237	247.37249697533264	0.3736971824030337	-1.4758220646131337	36.02645996345765	881.4831326327742	-42.63379223042953	-40.067415119676205	145.33401085488	283.3989569387903	121.56453747308352	2.964988718855693	['Unclassified', 'Hover-Continuous-Mix', 'Unclassified']	113.4445123679512	0.36422136422136425	3.0362792488026247	6.03108189048963	2.0	False	0.49563945944358706	0.0	0.0
cor	2	2	31	0 days 00:25:52.138857004	0 days 00:25:52.180190334	0.04133333	True	7.0	31.0	0.3333333333333333	1.0	70.45454545454545	257.4332779316631	108.76858105547916	109.52654231712557	247.59148840103583	1.0534686407635183	-1.5936260484274098	30.35028659845519	518.873025799747	-518.3395352897262	-518.8730257997456	139.87682891558072	277.94177499949103	14.824943594278436	14.824943594278436	['Hover-Continuous-Mix', 'Unclassified']	49.8354126416385	0.15999999999999998	1.8826149038287767	3.022791279728085	1.0	False	0.5156244321233711	0.0	0.0
cor	2	2	32	0 days 00:25:56.577523341	0 days 00:25:56.661523335	0.08399999400000001	True	7.0	27.0	0.2	0.0	29.220779220779217	257.23817063151006	105.31990100350235	109.91252249800672	247.97746858191695	3.86702789036987	5.922619012954908	4.405759324845356	105.49466693499336	27.24507784732463	-35.16488897833127	105.50676317316142	243.5717092570716	8.861552022539442	2.9538506741798045	['Unclassified', 'Hover-Continuous-Mix']	118.58511596557686	0.3807256235827665	1.5165026279915386	3.210659626645864	1.0	False	0.4418611640463197	0.0	0.0
cor	2	2	33	0 days 00:25:59.458189794	0 days 00:25:59.492189792	0.033999998000000003	False	4.0	4.0		0.0	10.695187165775401	246.92092181849375	99.02214105998777	115.56392142078684	253.62886750469707	2.4503597277998663	0.2917590237496584	98.55078160089977	87.24687087121589	87.2468708712162	-87.24687087121589	17.013139819887098	17.01313981988709	2.9663936096213384	2.9663936096213384	['Unclassified']	205.0301465473573	0.6582633053221291	1.488426670464266	2.3025970308955594	0.0	False	0.44580663475114973	0.0	0.0
cor	2	2	34	0 days 00:26:31.744854064	0 days 00:26:31.788854061	0.043999997000000006	True	4.0	11.0	0.65	0.0	22.72727272727273	309.01173154968603	193.4071659408312	194.09036076289928	209.09036076289917	0.21080777684401286	5.108096960866376	1.4957855653666308	0.0	0.0	-3.3072534609924664e-13	192.5945751975326	207.59457519753258	0.0	0.0	['Hover']	2.96639360962134	0.009523809523809523	1.8877682006162968	3.435193760499893	1.0	False	0.01902969087498308	0.0	0.0
cor	2	2	35	0 days 00:26:37.570186965	0 days 00:26:37.628853627	0.058666662	True	4.0	7.0	0.0	0.0	10.606060606060607	309.7984989883635	190.54673456517259	192.68253955632161	207.68253955632161	2.3581605398938654	-2.316075645499893	0.08796435878892361	0.0	1.4288203004995377	-2.425319204727809e-13	192.59457519753258	207.59457519753258	0.0	0.0	['Hover']	20.764755267349386	0.06666666666666668	1.3176005907161203	2.5253381988389805	1.0	False	0.19159933979214105	0.0	0.0
cor	2	2	36	0 days 00:26:42.542186596	0 days 00:26:42.586186592	0.043999996	True	6.0	12.0	0.3333333333333333	0.5	24.793388429752067	307.78308243355787	189.37628698046848	191.53004935157546	206.53004935157546	2.0004895091578283	2.322087543388756	1.0645258459571567	0.0	1.743180865491638	-3.3072534609924664e-13	192.5945751975326	207.59457519753258	2.842170943040401e-13	0.0	['Hover']	2.96639360962134	0.009523809523809523	1.7463931398976305	2.9096441376132054	1.0	False	0.02116296903572831	0.0	0.0
cor	2	2	37	0 days 00:26:52.116185885	0 days 00:26:52.140852550	0.024666665	True	4.0	11.0	1.0	1.0	38.46153846153847	310.4109073401266	118.80850480778793	120.94170028227586	135.94170028227592	2.5042344042044697	-21.081231842249906	2.8467389002537966	0.0	2.2219844151538712	2.667268115776371e-13	123.78843918252964	138.78843918252963	9.947598300641404e-14	1.4210854715202004e-14	['Hover']	8.89918082886402	0.028571428571428574	2.44785639651187	3.970536630956663	1.0	False	0.04334144645549939	0.0	0.0
cor	2	2	38	0 days 00:26:54.298852389	0 days 00:26:54.396852382	0.097999993	True	10.0	66.0	0.4166666666666666	1.0	61.224489795918366	308.08422322324776	116.896571990087	119.05052038455929	134.05052038455932	0.17415002901613158	-2.3309590040697996	83.49844719743841	1004.427681564222	-846.654273499402	-173.24373825212035	141.86128455324263	269.8801125894867	22.90786378641917	16.977886348707784	['Hover-Continuous-Mix', 'Unclassified']	85.35948958298141	0.2740524781341108	1.7610805902523017	3.3405338353471064	2.0	False	0.5778765461460775	0.0	0.0
cor	2	2	39	0 days 00:26:55.565518962	0 days 00:26:55.605518959	0.039999997	True	7.0	15.0	0.0	0.0	34.09090909090909	308.7390148943293	117.12658280649751	119.27470293498348	134.27470293498345	0.36015771952849346	-0.4654646776035776	4.513736247546191	0.0	-0.10098298595650128	1.7337242752546444e-13	123.78843918252964	138.78843918252966	7.105427357601003e-14	1.4210854715202004e-14	['Hover-Continuous-Mix']	19.2815584625387	0.061904761904761886	1.7180345055319666	2.6277223056489905	2.0	False	0.2091217616981273	0.0	0.0
cor	2	2	40	0 days 00:26:56.275518909	0 days 00:26:56.330852239	0.05533333	True	7.0	19.0	0.0	1.0	30.844155844155846	308.83759843308917	117.47423541090298	119.62146569099946	134.62146569099946	0.28857145650248656	-0.5164300406535561	10.256957579814623	160.26273916538028	-160.56515353819026	-160.26273916537997	129.87842327081407	144.8784232708141	14.957855655435596	8.974713393261254	['Hover-Continuous-Mix', 'Unclassified']	183.8104611676079	0.5901360544217688	1.3114707947057826	2.824818067997793	1.0	False	0.4556059010463221	0.0	0.0
cor	2	2	41	0 days 00:27:01.798185166	0 days 00:27:01.880185160	0.081999994	True	11.0	56.0	0.4	1.0	62.08425720620843	308.9394565533056	117.45710283323432	119.6034285691602	134.6034285691602	0.5457043845345783	0.3475340727347413	62.192859563439924	524.5452114574321	416.9707831974488	-416.01861598348023	57.41056900572029	57.41056900572031	41.529510534698794	35.596723315456046	['Unclassified', 'Hover-Continuous-Mix', 'Unclassified']	171.25496765789532	0.5498257839721253	2.2420378441818505	5.024296999961955	1.0	False	0.779582305221392	0.0	0.0
cor	2	2	42	0 days 00:27:10.052184553	0 days 00:27:10.153517879	0.101333326	True	11.0	107.0	0.42857142857142855	2.0	95.36541889483068	310.81150335488115	115.04030001981893	117.1700841770291	132.17008417702908	0.8799902176917153	-2.518651155949586	52.69144938440311	523.2967702943316	437.33520104092264	-523.2967702957724	65.98451945012039	93.05607750578908	53.376270570168856	53.376270570168856	['Continuous', 'Fragmented-Continuous-Mix', 'Continuous']	76.66091720550833	0.246125116713352	2.10635871644424	4.6547713136192375	2.0	True	0.9576706481696556	0.098	0.9607843137254902	53.269060063547066	529.4570150273136	440.03618519888624	-529.521160871001	65.46921695196346	[185.69101259 56.82762615]	53.376270570168856	0.0	0.1	11.0	104.0	0.42857142857142855	96.47495361781077
cor	2	2	43	0 days 00:27:11.625517770	0 days 00:27:11.676851099	0.051333329	True	7.0	17.0	0.29166666666666663	0.0	29.720279720279716	313.16297034184004	115.29208899575985	117.40096554622038	132.4009655462204	3.413240969072856	-8.696789698262545	6.387473636309269	0.0	5.726975878767017	-2.798445236224397e-13	123.78843918252966	138.78843918252966	1.1368683772161605e-13	0.0	['Hover']	15.858796605283315	0.050915750915750915	1.4488802339283164	2.5926982641928777	1.0	False	0.1825598290075448	0.0	0.0
cor	2	2	44	0 days 00:27:16.000184112	0 days 00:27:16.121517436	0.121333324	True	9.0	64.0	0.2857142857142857	1.0	47.69001490312965	286.0265531330882	114.66836618734541	91.46702449287973	106.46702449287973	2.69789034805296	-11.385598796418558	1.3483954133805942	112.8319548278426	-0.2406973315758588	-2.981949841878453e-13	90.92232151854726	105.92232151854729	16.51859818679651	0.0	['Hover-Continuous-Mix']	37.5905288563491	0.12068696330991414	1.2430206872501686	4.197187266144802	1.0	False	0.35493057212285645	0.0	0.0
cor	2	2	45	0 days 00:27:19.538850516	0 days 00:27:19.576183846	0.037333330000000005	True	5.0	10.0	0.0	0.0	25.25252525252525	280.1174426132613	107.12248182261676	86.96850667283618	225.03345275674644	2.6338631843531237	-13.241914946294267	19.60298994562836	76.47499160553775	-80.69344708589414	-76.47499160553929	104.68531263077016	119.68531263077016	2.753099697799413	2.753099697799413	['Hover-Continuous-Mix']	26.36794319663413	0.08465608465608468	2.1454241711197866	4.183775820076184	1.0	False	0.5797634028600872	0.0	0.0
cor	2	2	46	0 days 00:27:19.798850496	0 days 00:27:19.884183823	0.08533332699999999	True	9.0	30.0	0.0	0.0	32.467532467532465	280.608494686946	108.33049599722256	86.4112450328285	224.47619111673882	1.2851053425026755	-16.588879208920254	1.7623802027690685	0.0	-0.4858808242968098	-8.661854302599316e-14	87.40196452791855	102.40196452791857	0.0	0.0	['Hover-Continuous-Mix']	47.53292617321814	0.15260770975056692	2.3681811370063817	6.046827914310796	1.0	False	0.6216064068872493	0.0	0.0
cor	2	2	47	0 days 00:27:27.752183239	0 days 00:27:27.895516562	0.143333323	True	11.0	124.0	0.3333333333333333	2.0	78.28282828282829	278.160071434558	199.5	0.0	0.0	0.4481797329535381	-1.0385346056181601	108.26673770371755	8725.175342743829	4.042198674546348e-12	4.042198674546348e-12	108.26673770371755	199.43413306404784	1817.3282614033105	0.0	['Unclassified', 'Fragmented-Continuous-Mix', 'Unclassified', 'Hover-Continuous-Mix', 'Unclassified']	211.3143447742757	0.6784391534391534	4.0148318464641966	9.067743234307992	1.0	False	0.3919720278462306	0.0	0.0
cor	2	2	48	0 days 00:27:30.604849694	0 days 00:27:30.722183019	0.117333325	True	10.0	116.0	0.5384615384615384	2.0	90.9090909090909	279.29596827348763	199.47144506799359	0.0	0.0	0.5341758817666986	-2.5197009663917567e-05	144.96312620684662	3321.2946620809967	664.2589324168347	664.2589324168347	144.96312620684662	273.5063518711769	308.2161446414105	0.0	['Unclassified', 'Hover-Continuous-Mix', 'Unclassified']	86.33228298346239	0.27717569786535307	2.898529242294817	7.176337343596813	1.0	False	0.535295634173665	0.0	0.0
cor	2	2	49	0 days 00:27:34.324849418	0 days 00:27:34.406849412	0.081999994	True	10.0	39.0	0.0	1.0	43.23725055432372	278.8549554781021	199.4308919773096	0.0	0.0	0.6971764996547432	0.0	12.842313797750919	506.4574455451067	-1.3309678562530656e-13	-1.3309678562530656e-13	12.842313797750919	12.842313797750919	41.52951053469876	0.0	['Hover-Continuous-Mix', 'Continuous']	25.53992546820324	0.08199767711962835	2.328415443727861	4.722296262459928	2.0	True	0.8537712887618079	0.07	0.8536585365853658	14.789590996540682	593.2787219242679	-1.2992781453898974e-13	-1.2992781453898974e-13	14.789590996540682	[14.789591]	41.52951053469876	0.012	0.08	10.0	39.0	0.0	50.64935064935065
cor	2	2	50	0 days 00:27:36.526182588	0 days 00:27:36.564182585	0.037999997	True	9.0	21.0	0.0	1.0	50.23923444976077	279.2999984687412	199.56744619618115	0.0	0.0	0.6488622490954095	0.0	1.48319680481067	0.0	-5.983517774821897e-15	-5.983517774821897e-15	1.48319680481067	1.48319680481067	0.0	0.0	['Hover']	2.96639360962134	0.009523809523809523	2.2515371823802988	4.001816344645438	1.0	False	0.026494217346955132	0.0	0.0
cor	2	2	51	0 days 00:27:37.890182487	0 days 00:27:38.051515808	0.161333321	True	10.0	103.0	0.3181818181818182	1.0	57.80022446689114	279.30183104297697	200.54958180687882	0.0	0.0	0.4342623010795846	0.0	41.76755446633503	659.1985799158531	-146.48857331463202	-146.48857331463202	41.76755446633503	41.76755446633504	106.7901699463682	23.73114887697072	['Continuous', 'Fragmented-Continuous-Mix', 'Unclassified']	80.60533746637736	0.25878894767783656	3.238476617318652	11.04500086660083	1.0	True	0.986237519942554	0.114	0.7037037037037037	41.55553153127437	362.62083562948817	364.2939520587612	364.2939520587612	41.55553153127437	[41.55553153]	41.529510534698744	0.0	0.11199999999999999	10.0	83.0	0.3666666666666667	66.18819776714513
cor	2	2	52	0 days 00:27:38.632849098	0 days 00:27:38.703515760	0.070666662	True	9.0	23.0	0.0	1.0	29.870129870129873	279.3355735798846	199.64530876587762	0.0	0.0	0.2795410432757397	0.0	1.4831968048106696	0.0	-1.6240976817373716e-15	-1.6240976817373716e-15	1.4831968048106696	1.4831968048106696	0.0	0.0	['Hover']	6.102295425506755	0.01959183673469388	1.5839994940282294	2.4804883212779525	0.0	False	0.053514040323335364	0.0	0.0
cor	2	2	53	0 days 00:27:39.944849001	0 days 00:27:39.996182330	0.051333329	True	8.0	24.0	0.0	1.0	43.63636363636364	279.11760966958667	199.87275260850384	0.0	0.0	0.5645581049565659	0.0	200.06609990835133	0.0	-2.9103830456733704e-13	-2.9103830456733704e-13	200.06609990835133	338.13104599226165	0.0	0.0	['Hover-Continuous-Mix']	45.089182866244364	0.14476190476190476	2.3399171709043043	4.108031354547474	1.0	False	0.2401085270067834	0.0	0.0
cor	2	2	54	0 days 00:27:41.040848919	0 days 00:27:41.124182247	0.08333332800000001	True	8.0	50.0	0.16666666666666666	1.0	55.43237250554324	279.29999999999995	199.5	0.0	0.0	0.12372659601047285	0.0	6.692473387560339	180.8776591232524	180.87765912325298	180.87765912325298	6.692473387560339	6.692473387560339	14.831968048106699	14.831968048106699	['Hover-Continuous-Mix', 'Unclassified', 'Fragmented-Continuous-Mix']	78.28385086854364	0.25133565621370496	1.7217891041938018	4.174010257022468	1.0	False	0.7290187746989848	0.0	0.0
cor	2	2	55	0 days 00:27:41.909515522	0 days 00:27:41.980848850	0.071333328	True	7.0	34.0	0.4	1.0	42.929292929292934	279.2999999999999	199.48438974004657	0.0	0.0	0.4741144427454522	0.0	1.4831968048106696	0.0	-1.5789838572446672e-15	-1.5789838572446672e-15	1.4831968048106696	1.4831968048106696	0.0	0.0	['Hover-Continuous-Mix']	25.379145326760348	0.08148148148148149	1.1751292472999355	3.6146179477432168	1.0	False	0.659313510332224	0.0	0.0
cor	2	2	56	0 days 00:27:45.657515243	0 days 00:27:45.815515232	0.157999989	True	11.0	110.0	0.5313725490196078	1.0	63.291139240506325	279.0696819126814	199.4991269940604	0.0	0.0	0.4387986167326261	0.0	33.36777797532902	2162.500853216728	-3.684029171738443e-13	-3.684029171738443e-13	33.36777797532902	38.800624029148395	665.5519079593462	0.0	['Unclassified', 'Fragmented-Continuous-Mix', 'Fragmented', 'Fragmented-Continuous-Mix', 'Unclassified']	242.04269883062213	0.7770946353224832	2.3594273343379317	9.225134912743085	2.0	False	0.587308517562574	0.0	0.0
cor	2	2	57	0 days 00:27:45.883515227	0 days 00:27:45.936181889	0.052666662	True	8.0	28.0	0.5	1.0	48.95104895104895	279.09299546254744	199.47614827121305	0.0	0.0	0.4155091034144349	0.0	1.4831968048106696	0.0	-2.1862853408003088e-15	-2.1862853408003088e-15	1.4831968048106696	1.4831968048106696	0.0	0.0	['Unclassified', 'Hover-Continuous-Mix']	193.38604493492957	0.6208791208791209	2.318974405530277	6.160233942914117	1.0	False	0.4719066241570582	0.0	0.0
cor	2	2	58	0 days 00:27:45.982181886	0 days 00:27:46.089515211	0.107333325	True	9.0	51.0	0.2159090909090909	1.0	42.929292929292934	278.9617547351965	199.47901397328468	0.0	0.0	0.3904305741026065	0.0	1.4831968048106705	0.0	-1.0526559048297778e-15	-1.0526559048297778e-15	1.4831968048106705	1.4831968048106705	0.0	0.0	['Hover']	8.020249388976213	0.02574955908289241	2.3573107126580943	6.659750708602479	1.0	False	0.202588871567192	0.0	0.0
cor	2	2	59	0 days 00:27:49.388848300	0 days 00:27:49.500848291	0.111999991	True	9.0	73.0	0.4444444444444444	1.0	59.25324675324675	278.15480462867663	199.50076178120491	0.0	0.0	0.8325319491944734	0.0	79.43349698375569	4048.793940491753	555.616897911377	555.616897911377	79.43349698375569	155.86230642306313	391.23582876937	0.0	['Unclassified', 'Hover-Continuous-Mix', 'Unclassified']	197.4240889831916	0.6338435374149659	2.109344194469757	4.3773672428533885	2.0	False	0.4743887381892357	0.0	0.0
cor	2	2	60	0 days 00:27:54.947514554	0 days 00:27:55.009514549	0.061999995	True	9.0	36.0	0.2	1.0	52.785923753665685	278.3174942665474	199.49999999999997	0.0	0.0	0.4216696481089193	0.05161408774636364	16.50654508579617	287.0703493181942	287.070349318194	287.070349318194	16.50654508579617	16.50654508579617	17.798361657728034	17.798361657728034	['Continuous']	27.080302952349648	0.08694316436251923	1.6732752993777331	4.0841623052548846	1.0	True	0.8461910656099794	0.062	1.0	16.50654508579617	287.0703493181942	287.070349318194	287.070349318194	16.50654508579617	[16.50654509]	17.798361657728034	0.0	0.06	9.0	36.0	0.2	52.785923753665685
cor	2	2	61	0 days 00:27:58.884847595	0 days 00:27:58.993514253	0.108666658	True	10.0	37.0	0.25	1.0	31.144781144781145	282.0361071807968	197.02157079459	0.8350897649525614	0.8350897649525614	1.9110457619314276	2.4661429065603064	0.6481070398581087	0.0	-2.013836473021862	-2.0559685641206607e-15	1.4831968048106705	1.4831968048106705	6.2172489379008774e-15	0.0	['Hover-Continuous-Mix', 'Unclassified']	142.38689326182433	0.4571428571428573	1.7944315908070738	3.875206507073624	1.0	False	0.3099409382376089	0.0	0.0
cor	2	2	62	0 days 00:27:59.157514241	0 days 00:27:59.210180904	0.052666662999999996	True	5.0	16.0	0.6666666666666666	0.0	27.97202797202797	283.7584223103991	196.820251519759	1.1008513325468317	1.1008513325468317	1.7100705647358476	2.6611269818203307	187.58166930894885	115.06042811873455	58.58864929109161	57.530214059366976	188.6825206414957	203.6825206414957	8.974713393261254	2.9915711310870847	['Unclassified', 'Hover-Continuous-Mix']	94.12595107452327	0.30219780219780223	1.682797132396164	3.3057348858596494	1.0	False	0.6004993887615911	0.0	0.0
cor	2	2	63	0 days 00:28:00.385514150	0 days 00:28:00.462847478	0.07733332799999999	True	8.0	29.0	0.1	0.0	33.7995337995338	273.9075302751168	194.9033819280141	2.646981109690829	2.646981109690829	2.8435321708652426	2.867228469469945	7.735396523983862	0.0	8.534009899698917	-2.3320376968536618e-14	10.382377633674693	10.382377633674693	0.0	0.0	['Hover-Continuous-Mix']	19.92808014668695	0.06398046398046398	1.917443732571716	5.000202414971512	1.0	False	0.3547966128814158	0.0	0.0
cor	2	2	64	0 days 00:28:01.113514096	0 days 00:28:01.150847427	0.037333331	True	4.0	16.0	0.25	1.0	38.277511961722496	272.88923993257544	193.85025877442555	3.661179440358572	3.661179440358572	3.3246059363963294	2.3509331351386358	2.1779826355479024	0.0	7.693011513014107	-5.983517774821897e-15	1.48319680481067	1.48319680481067	0.0	0.0	['Hover']	8.89918082886402	0.028571428571428567	2.362181996669397	3.972436949293158	1.0	False	0.17651982377904046	0.0	0.0
cor	2	2	65	0 days 00:28:03.328847265	0 days 00:28:03.390180594	0.06133332900000001	True	7.0	17.0	0.5	0.0	25.75757575757576	288.59805399971196	195.6689393580417	2.432831707696843	2.432831707696843	2.03751484336333	2.891750671848881	0.9496349028861728	0.0	1.7286085086956833	-1.8947806286936005e-15	1.4831968048106694	1.4831968048106694	0.0	0.0	['Hover']	8.89918082886402	0.028571428571428574	1.4464996475100491	3.280486659583282	2.0	False	0.1283730526263283	0.0	0.0
cor	2	2	66	0 days 00:28:03.803513896	0 days 00:28:03.862847225	0.059333329	True	6.0	16.0	0.0	0.0	24.24242424242424	291.18300869498034	193.2515058728125	4.945496387569394	4.945496387569394	1.9514823429835884	4.255735602866826	3.4622995827587246	0.0	0.443580730940305	-1.8947806286936005e-15	1.4831968048106694	1.4831968048106694	0.0	0.0	['Hover']	8.89918082886402	0.028571428571428574	1.819664237852856	4.0299710972839184	1.0	False	0.12295273490312993	0.0	0.0
cor	2	2	67	0 days 00:28:04.624847169	0 days 00:28:04.773513824	0.148666655	True	7.0	36.0	0.125	0.0	22.113022113022108	288.8966331754956	191.36136413931237	6.748573582787544	6.748573582787544	3.412720275600724	8.135804061982657	5.145117577586818	20.043200065009056	35.70992698797085	-20.043200065009067	1.603456005200724	1.603456005200724	2.96639360962134	2.96639360962134	['Hover-Continuous-Mix']	28.220825691532745	0.0906048906048906	1.1883774444987592	3.1573952079348038	1.0	False	0.5304036307383823	0.0	0.0
cor	2	2	68	0 days 00:28:11.348180003	0 days 00:28:11.397513333	0.04933333	True	5.0	12.0	0.0	0.0	21.81818181818182	283.86636084145306	118.10980086221676	79.75999177854675	79.75999177854675	3.2202779074861825	30.04852425134259	1.1505611235812478	0.0	-3.524220262479372	0.0	78.60943065496552	78.60943065496552	0.0	0.0	['Hover']	15.543902514415818	0.049904761904761896	1.469314012315226	3.4628717166802145	1.0	False	0.16440490535011373	0.0	0.0
cor	2	2	69	0 days 00:28:26.976178843	0 days 00:28:27.084845501	0.108666658	True	11.0	74.0	0.38461538461538464	1.0	61.15702479338843	250.80006733291316	198.35999999999737	201.5485942676144	339.61354035152465	0.2637969857936823	0.6204997915887134	30.8089282330356	970.3599443527733	0.0	1.3229013843969865e-13	170.73966603457868	308.8046121184889	106.73959387880495	0.0	['Hover-Continuous-Mix', 'Continuous', 'Hover-Continuous-Mix', 'Unclassified']	61.16164278746543	0.1963636363636364	1.076322204771016	3.459278957647337	1.0	True	0.9442618489501275	0.09	0.8181818181818182	31.527713377000623	591.2638655564198	592.9977437711384	-592.9977437711382	170.02088089061363	[308.08582697]	53.36979693940248	0.006	0.094	10.0	66.0	0.3636363636363637	66.66666666666667
cor	2	2	70	0 days 00:28:34.886178255	0 days 00:28:34.925511586	0.039333331	True	6.0	12.0	0.375	0.0	27.27272727272727	246.59908087632084	193.44866696152963	199.00677511637628	337.07172120028656	1.8886795746636031	-5.429887090362228	1.0593247919750544	0.0	1.9192186676772915	-1.0913936421275136e-12	200.06609990835128	338.13104599226165	1.9895196601282808e-13	2.8421709430404014e-14	['Hover-Continuous-Mix', 'Unclassified']	130.2246794623768	0.4180952380952381	1.8229169343120584	3.0481992432242877	1.0	False	0.17535308467378666	0.0	0.0
cor	2	2	71	0 days 00:29:42.268839920	0 days 00:29:42.436839907	0.16799998700000002	True	10.0	119.0	0.4615384615384616	1.0	64.39393939393939	285.26208317617835	118.50640561533977	79.41600316993923	79.41600316993923	0.3871848423593784	-5.1326849270186665	59.74816593901865	719.782348057642	655.9280313564948	654.2323552537689	139.16416910895794	258.18334972750097	120.92343447383124	109.9110356826334	['Unclassified', 'Fragmented-Continuous-Mix', 'Continuous', 'Unclassified', 'Hover-Continuous-Mix', 'Unclassified']	132.85205665946995	0.42653061224489786	2.2630176890543714	7.238282141435636	4.0	True	0.9449005589773364	0.06	0.35714285714285715	66.11501615012304	384.18055937959434	396.9753482865059	395.33182918075914	145.51030748140653	[283.57525357]	23.719909750845606	0.06	0.11800000000000001	9.0	72.0	0.6	109.09090909090908
cor	2	2	72	0 days 00:29:46.189506295	0 days 00:29:46.216839627	0.027333332	True	3.0	4.0	1.0	0.0	12.987012987012987	273.4154186211403	111.60804054523364	93.41157461665044	231.47652070056077	3.3477569535928815	11.207569500721755	5.909234600394684	0.0	7.951124498446616	2.598556290779795e-13	87.5023400162558	225.5672861001661	0.0	0.0	['Hover-Continuous-Mix']	41.95328105035895	0.1346938775510204	1.86108104614618	2.7872841300986644	1.0	False	0.6372709793341204	0.0	0.0
cor	2	2	73	0 days 00:30:00.234838586	0 days 00:30:00.448171904	0.213333318	True	10.0	210.0	0.4	2.0	90.0514579759863	288.3809889097448	100.55098689779658	92.66873792504155	107.66873792504155	0.7908462133597671	1.8223789348373056	43.70314944500912	479.48244817526114	267.3718378913329	204.7707892330331	126.38490941363293	233.10312394786789	99.32095735761591	43.41140731740305	['Unclassified', 'Fragmented-Continuous-Mix', 'Continuous', 'Hover-Continuous-Mix', 'Unclassified']	91.67835344452364	0.29433962264150937	3.76850202273064	10.93155154064474	3.0	True	0.9753188602025322	0.114	0.5377358490566038	52.38741204337562	529.814934887518	519.0347581834485	519.5383954975496	131.78022136608965	[269.84516745]	65.15735452443204	0.068	0.18	10.0	150.0	0.5	119.61722488038279
cor	2	2	74	0 days 00:30:04.617504927	0 days 00:30:04.704838254	0.08733332699999999	True	7.0	30.0	0.0	0.5	30.991735537190085	293.76362364955736	123.34789980551157	99.88254565180536	114.88254565180536	3.4113331891492766	-11.796682274344855	7.164374332419742	142.49445309525518	-144.79348893363868	92.14472569195816	92.7853042892614	110.5822348820775	5.405823907261549	5.405823907261549	['Hover-Continuous-Mix']	43.55205163216785	0.13982683982683985	1.5422004108829412	3.0681681375458254	2.0	False	0.5442413897560671	0.0	0.0
cor	2	2	75	0 days 00:30:04.826838245	0 days 00:30:04.914838239	0.08799999400000001	True	6.0	16.0	0.5	0.0	16.528925619834713	293.64866206381083	122.99729526458769	99.73952759666436	114.73952759666436	3.1794365252666985	-12.992550834983682	6.831363673147028	0.0	0.28561035848217564	-8.268133652481166e-14	92.90816392351734	107.90816392351731	0.0	0.0	['Hover']	19.281558462538708	0.06190476190476193	1.8151559506155373	5.1221049319658585	1.0	False	0.1658814253853709	0.0	0.0
cor	2	2	76	0 days 00:30:04.926838238	0 days 00:30:05.027504897	0.100666659	True	7.0	26.0	0.0	0.0	23.63636363636364	293.72432820777937	123.03427488389349	99.8179436430772	114.8179436430772	3.2646322829875323	-13.49808142370833	6.9097797195598805	0.0	1.0003658915729727	-1.4551915228366852e-13	92.90816392351734	107.90816392351731	0.0	0.0	['Hover']	22.544591433122182	0.07238095238095238	1.6394351276800747	4.742824902766887	2.0	False	0.1509582052187566	0.0	0.0
cor	2	2	77	0 days 00:30:08.694171291	0 days 00:30:08.758837953	0.064666662	True	6.0	14.0	0.5	0.0	19.283746556473826	290.63242714708724	111.82413591056171	95.82704890167648	110.82704890167648	1.58711058669527	7.3855125926007235	11.278559559954283	0.0	0.30894256547740445	0.0	87.5023400162558	225.5672861001661	0.0	0.0	['Hover-Continuous-Mix']	38.38333549419127	0.12323232323232322	1.8403391397072317	5.150467680229137	2.0	False	0.4158811057618245	0.0	0.0
cor	2	2	78	0 days 00:30:14.259504212	0 days 00:30:14.290170876	0.030666664000000007	True	3.0	5.0	1.0	0.0	15.151515151515152	294.9449209769084	121.917529362745	100.94394366089516	115.94394366089516	3.2353572360282614	0.6985164095496543	0.22351935602024595	0.0	3.5469898720399446	-2.425319204727809e-13	101.16746301691543	116.16746301691543	0.0	0.0	['Hover-Continuous-Mix']	20.962514841324133	0.06730158730158729	1.9878833721203364	2.7963118728905574	1.0	False	0.28428648880777824	0.0	0.0
cor	2	2	79	0 days 00:30:15.732837436	0 days 00:30:15.794170764	0.06133332800000001	True	5.0	8.0	0.3333333333333333	0.0	12.12121212121212	293.55545961179746	122.50689693613928	99.60685925587136	114.60685925587136	0.5279893341921426	-6.156637685716504	2.570073650237119	45.88499496332266	42.06545430152122	45.88499496332248	102.17693290610852	117.17693290610852	2.753099697799442	2.7530996977993567	['Unclassified', 'Hover-Continuous-Mix']	70.79792748296262	0.22730158730158725	2.0134495845916778	5.8897353391155445	1.0	False	0.2812847924157364	0.0	0.0
cor	2	2	80	0 days 00:30:16.212837400	0 days 00:30:16.267504062	0.054666662000000005	True	8.0	32.0	0.0	1.0	53.87205387205387	293.50115794326405	122.97750080488312	99.59090400272218	114.59090400272218	0.5857364822798634	-9.455659600146443	23.865138387464476	304.69705964775994	308.20387517669633	304.69705964775846	123.45604239018664	138.45604239018664	14.957855655435425	14.957855655435425	['Continuous']	45.26496915422191	0.145326278659612	1.309886408332781	2.0921541817880183	0.0	True	0.9395798157269032	0.054000000000000006	1.0	23.865138387464476	304.69705964775994	308.20387517669633	304.69705964775846	123.45604239018664	[138.45604239]	14.957855655435425	0.0	0.052000000000000005	8.0	32.0	0.0	53.87205387205387
cor	2	2	81	0 days 00:30:22.013503636	0 days 00:30:22.132836960	0.119333324	True	7.0	40.0	0.3809523809523809	0.5	30.303030303030305	286.1747057473791	134.16481919609208	63.802824074456126	63.802824074456126	3.5009482941402994	-10.694819396068663	32.27140450153046	22.94249748166133	-23.941583811319443	-22.942497481661306	96.0742285759866	111.0742285759866	2.7530996977993567	2.7530996977993567	['Hover-Continuous-Mix', 'Unclassified']	52.95012593174091	0.16999999999999998	1.31799350667297	3.936655464645828	1.0	False	0.4821660411596534	0.0	0.0
cor	2	2	82	0 days 00:30:36.316835907	0 days 00:30:36.382169236	0.06533332900000001	True	10.0	39.0	0.16666666666666666	1.0	55.39772727272727	277.20668221658127	199.40621388632724	0.0	0.0	0.4174608409799112	0.0	20.11585666524471	278.09940090200064	139.04970045100043	139.04970045100043	20.11585666524471	20.11585666524471	14.831968048106704	8.89918082886402	['Continuous', 'Hover-Continuous-Mix']	23.267649875467377	0.07470238095238096	2.43423030878622	4.819851236374292	2.0	True	0.9091042365265612	0.054000000000000006	0.84375	19.830890612468586	247.313062773015	247.19946746844508	247.19946746844508	19.830890612468586	[19.83089061]	11.86557443848536	0.0	0.052000000000000005	10.0	35.0	0.16666666666666666	58.92255892255893
cor	2	2	83	0 days 00:30:38.144169105	0 days 00:30:38.225502432	0.08133332700000001	False	8.0	44.0	0.5714285714285714	1.0	48.78048780487804	277.2618645594132	198.91433192160045	0.0	0.0	0.8178754102578539	0.0	32.16004779211427	1483.1968048106692	-7.985807137518393e-13	-7.985807137518393e-13	32.16004779211427	32.160047792114256	124.58853160409625	0.0	['Unclassified']	260.608531264782	0.8367015098722413	2.0468777857467355	6.34434207784722	1.0	False	0.3187935855795357	0.0	0.0
cor	2	2	84	0 days 00:30:41.279502206	0 days 00:30:41.346168867	0.066666661	True	6.0	25.0	0.4142857142857143	1.0	34.435261707988985	277.1771949612412	198.6051711918945	0.0	0.0	0.3384272167805177	0.0	12.090301227093036	314.61750405074815	-224.72678860767817	-224.72678860767817	12.090301227093036	12.090301227093036	20.76475526734938	14.831968048106699	['Continuous', 'Hover-Continuous-Mix']	28.944810372668826	0.09292929292929293	2.9855809230575683	6.930289522955488	2.0	True	0.8373274459962601	0.05	0.7575757575757576	15.484574642223395	412.04031376038125	-296.63936096213524	-296.63936096213524	15.484574642223395	[15.48457464]	20.76475526734938	0.0	0.048	6.0	22.0	0.45	40.0
cor	2	2	86	0 days 00:30:55.710834468	0 days 00:30:55.768167797	0.057333329	True	7.0	12.0	0.0	0.0	19.48051948051948	272.0218773731424	189.22104925324695	8.254608581636647	8.254608581636647	1.4108129046437912	2.027714100397513	3.8050181672046364	0.0	-2.550205782903823	0.0	4.44959041443201	4.449590414432008	0.0	0.0	['Hover']	11.865574438485355	0.038095238095238106	1.519254469902782	2.7530739039232976	2.0	False	0.1986482671960073	0.0	0.0
cor	2	2	87	0 days 00:31:28.270165384	0 days 00:31:28.414832040	0.144666656	True	11.0	92.0	0.35416666666666663	1.0	57.28518057285181	249.64305140229686	198.36	201.54859426761425	339.6135403515245	0.6224329021051829	1.0191289324891324	203.5136171677282	1206.5309776526485	-27.92819080714273	-1186.0407644260224	146.22115049123875	158.75539706658122	179.1450938683736	173.16195160619947	['Hover-Continuous-Mix', 'Unclassified', 'Hover-Continuous-Mix']	187.41105928183032	0.6016960208741031	2.3173029758971504	7.162939583813097	1.0	False	0.47596917106999503	0.0	0.0
cor	2	2	88	0 days 00:31:32.608165062	0 days 00:31:32.712165054	0.103999992	True	11.0	87.0	0.4807692307692308	2.0	76.04895104895104	250.03588427869062	198.36	201.54859426761433	339.61354035152465	0.5488791547894821	-0.18022612968456775	58.500544314160074	855.1245624870874	855.1245624870862	-855.1245624870862	143.04804995345418	281.1129960373644	88.93295449865698	88.93295449865698	['Unclassified', 'Fragmented-Continuous-Mix', 'Continuous']	61.66675946155129	0.19798534798534792	3.2477997613674887	5.681599019693266	3.0	True	0.9904047398931878	0.086	0.8269230769230769	65.60782894844321	559.5860892757547	551.4315399381077	-551.4315399381077	135.94076531917105	[274.0057114]	47.42311243467728	0.018000000000000002	0.102	11.0	76.0	0.4142857142857143	80.33826638477801
cor	2	2	89	0 days 00:31:32.785498382	0 days 00:31:32.838165045	0.052666662999999996	True	7.0	27.0	0.3333333333333333	1.0	47.2027972027972	249.86799329169546	198.36	201.54859426761425	339.61354035152465	0.7140257357165218	-0.22356433162411365	133.31243917443572	317.66534974607987	317.6653497460797	317.66534974608027	103.81467426479944	118.81467426479944	16.518598186796197	16.518598186796197	['Continuous', 'Hover-Continuous-Mix', 'Unclassified']	108.04518262736187	0.3468864468864469	1.397258983618193	3.2512270917381585	1.0	True	0.8937713587829738	0.03	0.5769230769230769	129.38044806757867	320.2853854596317	321.1949647432588	321.1949647432591	99.88268315794241	[114.88268316]	8.25929909339807	0.0	0.027999999999999997	6.0	21.0	0.5	63.63636363636363
cor	2	2	90	0 days 00:31:33.132165023	0 days 00:31:33.232165015	0.099999992	True	9.0	47.0	0.25	1.0	42.72727272727273	250.4215604430805	198.39295477083562	201.54859426761428	339.61354035152465	0.9158829256844636	-0.3616886539347775	8.47986773576236	177.89932313134182	-118.59954875422777	118.59954875422787	193.06872653185192	331.1336726157622	17.78993231313413	11.859954875422803	['Continuous', 'Hover-Continuous-Mix']	28.596034396749715	0.0918095238095238	1.9139309861823184	4.847876191468799	3.0	True	0.8650968923204216	0.066	0.66	12.084575232746918	269.54442898688154	-179.69628599125417	179.69628599125434	189.46401903486733	[327.52896512]	17.78993231313413	0.0	0.064	9.0	40.0	0.375	55.09641873278236
cor	2	2	91	0 days 00:31:44.451497516	0 days 00:31:44.480830847	0.029333331	True	7.0	18.0	0.0	1.0	54.54545454545454	252.22305943764712	110.19729646166462	114.64955054911451	252.71449663302482	1.575083695161328	-29.27062022498319	5.3618539501331135	0.0	1.7812324614344432	-2.425319204727809e-13	120.01140449924765	258.07635058315793	0.0	0.0	['Hover']	17.798361657728034	0.05714285714285715	2.3412133611138084	4.1001718077899705	1.0	False	0.18198437975299814	0.0	0.0
cor	2	2	92	0 days 00:31:45.304830786	0 days 00:31:45.384164113	0.07933332700000001	True	6.0	27.0	0.4	1.0	31.46853146853147	253.61552895852367	111.20314965841074	113.20346402360788	251.26841010751812	2.1736029862170154	-19.75556295997194	12.737917913351092	0.0	-0.9744382053450816	-1.8656301574829294e-13	125.94138193695903	264.00632802086915	0.0	0.0	['Hover']	17.798361657728034	0.05714285714285713	1.13827841435704	2.816644532571855	1.0	False	0.18092370742021127	0.0	0.0
cor	2	2	93	0 days 00:32:34.314827148	0 days 00:32:34.367493810	0.052666662	True	8.0	30.0	0.0	1.0	52.447552447552454	242.4638269022275	114.5294560412203	120.19435155656559	258.25929764047584	2.1767023832940042	-22.0382079177993	2.782041661537709	0.0	-13.153422110725725	-8.329747148449172e-13	122.97639321810327	261.04133930201357	1.2789769243681806e-13	1.4210854715202004e-14	['Hover-Continuous-Mix', 'Hover']	26.92572661040909	0.08644688644688645	1.9827509796319256	4.252807853972209	1.0	False	0.17194914476503556	0.0	0.0
cor	2	2	94	0 days 00:32:34.466160470	0 days 00:32:34.505493800	0.03933333	True	6.0	17.0	0.0	1.0	38.63636363636363	240.59524087810254	115.56898167394311	121.2736965718922	259.33864265580246	2.7679939892104004	-22.488970977236985	1.7026966462111328	0.0	-2.2595923959982143	-8.5265128291212e-15	122.97639321810327	261.04133930201357	1.5631940186722204e-13	1.4210854715202004e-14	['Hover']	9.937418592231488	0.0319047619047619	2.3817459478044527	4.315295198207169	1.0	False	0.14592655503510887	0.0	0.0
cor	2	2	95	0 days 00:32:49.198826043	0 days 00:32:49.236159373	0.037333330000000005	True	8.0	28.0	0.16666666666666666	1.5	70.7070707070707	275.8681365150293	197.2199999999999	0.405511727556418	0.405511727556418	0.13757544190885124	-0.6553451438255921	1.077685077254252	0.0	-0.030559705260549342	-9.473903143468004e-15	1.48319680481067	1.48319680481067	1.5543122344752194e-15	2.220446049250313e-16	['Hover-Continuous-Mix']	21.58875349224419	0.06931216931216931	1.854593874939496	3.0198956497289613	1.0	False	0.3700050293052528	0.0	0.0
cor	2	2	96	0 days 00:32:51.750159187	0 days 00:32:51.900159175	0.149999988	True	10.0	68.0	0.0	1.0	41.21212121212121	275.88000000000005	197.2195076897854	0.406448551994488	0.406448551994488	0.4652290845153346	-0.02542037050862977	21.048633611922856	1580.7028825388159	1204.3927424672127	1204.959691988249	21.45508216391734	23.29594811170281	228.274937015067	139.28312872642678	['Hover-Continuous-Mix', 'Continuous', 'Hover-Continuous-Mix', 'Unclassified', 'Fragmented-Continuous-Mix', 'Fragmented']	90.2574695620786	0.2897777777777778	1.8387406830537203	6.4599129951857845	3.0	True	0.9209783912069244	0.064	0.4266666666666667	20.173536986266164	637.9700106856415	462.8404263049308	463.49900150333497	20.579355666748047	[20.57935567]	41.52951053469878	0.034	0.096	7.0	33.0	0.0	46.875
cor	2	2	97	0 days 00:32:51.941492506	0 days 00:32:52.101492494	0.159999988	True	10.0	90.0	0.2	1.0	51.13636363636364	275.88000000000005	197.22	0.4059565880258159	0.4059565880258159	0.4243217646778662	-0.004416068366571574	141.94158704356678	1119.6568366773365	-1119.6568366773347	-1119.6568366773347	142.34754363159254	156.59754363159254	179.1450938683736	179.1450938683736	['Continuous', 'Fragmented-Continuous-Mix', 'Unclassified', 'Fragmented-Continuous-Mix', 'Fragmented', 'Unclassified']	136.78782532366398	0.4391666666666668	2.318085653855669	4.975120250461768	2.0	True	0.9568705792279	0.08199999999999999	0.5125	165.33744357926173	504.50761283667254	-510.7560467709659	-510.75604677096624	165.74340016728755	[180.74340017]	41.881995835219186	0.0	0.08	9.0	59.0	0.3333333333333333	65.41019955654103
cor	2	2	98	0 days 00:32:54.191492339	0 days 00:32:54.275492332	0.08399999300000001	True	11.0	48.0	0.0	1.0	51.948051948051955	275.94118799765823	197.25816207948452	0.3701157938926385	0.3701157938926385	0.2504969128153665	0.0019382792947232011	1.1130810109180314	0.0	-0.06211013089075675	-1.3534147347811431e-15	1.4831968048106698	1.4831968048106698	5.3290705182007506e-15	0.0	['Hover-Continuous-Mix']	19.5640721396455	0.06281179138321995	1.3423054934249798	3.1390780854196163	1.0	False	0.3790032238872231	0.0	0.0
cor	2	2	99	0 days 00:32:56.090825531	0 days 00:32:56.164158859	0.073333328	True	7.0	38.0	0.4583333333333333	1.0	47.97979797979797	275.87999999940047	197.2199999983011	0.4059565897010391	0.4059565897010391	0.07654670872403628	0.011107535742740465	43.842748087150596	185.39960060133373	-20.599955739957334	-20.59995562237039	44.248704676851645	44.248704676851645	11.865574438485405	7.105427357601002e-15	['Continuous']	20.84715508983886	0.0669312169312169	2.6826763236450373	5.641421118901715	2.0	True	0.9411962481718482	0.07200000000000001	1.0	43.842748087150596	185.39960060133373	-20.599955739957334	-20.59995562237039	44.248704676851645	[44.24870468]	11.865574438485405	0.0	0.07	7.0	38.0	0.4583333333333333	47.97979797979797
cor	2	2	100	0 days 00:32:57.627492084	0 days 00:32:57.728825409	0.101333325	True	10.0	49.0	0.08333333333333333	1.0	43.67201426024955	275.88	197.2199999999999	0.4059565880258461	0.4059565880258461	0.1557814217447115	0.05873238114905601	11.663193882492347	290.8229029040529	-116.32916116162174	-116.32916116162136	12.069150470518196	12.069150470518196	29.66393609621341	11.86557443848536	['Hover-Continuous-Mix', 'Unclassified', 'Hover-Continuous-Mix']	155.29943015076427	0.4985994397759103	1.6219858469206918	3.791656967067052	1.0	False	0.6722159207196025	0.0	0.0
cor	2	2	101	0 days 00:32:58.521492017	0 days 00:32:58.670158673	0.148666656	True	11.0	105.0	0.3333333333333333	1.0	64.4963144963145	275.88000000000005	197.22000000000003	0.40595658802575	0.40595658802575	0.005440641710134074	0.08744213759807884	6.208299433427237	280.6048009101267	1.0262541567302637e-12	1.4195491629023404e-12	6.614256021452987	6.614256021452987	41.52951053469876	0.0	['Hover', 'Hover-Continuous-Mix', 'Unclassified', 'Fragmented-Continuous-Mix', 'Unclassified']	69.3093858248013	0.2225225225225225	1.510243529050754	3.4305465039196408	2.0	False	0.7497991600960892	0.0	0.0
cor	2	2	102	0 days 00:33:00.261491888	0 days 00:33:00.395491878	0.13399999	True	11.0	66.0	0.08333333333333333	1.0	44.77611940298507	275.8800292287484	197.22000000141705	0.4059576826380099	0.4059576826380099	0.3874493907838419	0.06106847472720029	17.414541240833472	332.0589861516425	66.41269021885725	66.41179723032872	17.820498923471483	17.820498923471483	44.49590414432016	8.89918082886402	['Hover-Continuous-Mix', 'Continuous']	23.465501688049407	0.07533759772565743	2.5943408410555757	9.44091590009288	1.0	True	0.9556516426598552	0.126	0.9402985074626866	18.45182953542813	353.0908920740278	70.62934259038455	70.62841927669885	18.857787946878524	[18.85778795]	44.49590414432016	0.008	0.132	11.0	63.0	0.08333333333333333	45.45454545454545
cor	2	2	103	0 days 00:33:01.157491821	0 days 00:33:01.286158479	0.12866665800000002	True	11.0	112.0	0.4423076923076923	1.5	79.54545454545455	275.17637605983657	196.74634686677356	0.8528918983300545	0.8528918983300545	0.3863480851552215	0.0011580119710966586	71.68494518541577	2037.1833316424827	323.9754008225038	324.4493010523322	72.53783708374581	117.84039751752887	266.6894438882433	41.529510534698744	['Unclassified', 'Hover-Continuous-Mix', 'Unclassified']	154.20611780015932	0.4950892857142858	2.720505447523267	4.992924198104684	3.0	False	0.6042743469388562	0.0	0.0
cor	2	2	104	0 days 00:33:01.330825142	0 days 00:33:01.412158469	0.08133332700000001	True	11.0	65.0	0.4142857142857143	2.0	73.86363636363637	275.12772787722196	196.8061436887856	0.7913129079812643	0.7913129079812643	0.17563031263282308	-0.008943955930569571	39.30129416462413	10851.306792481564	-2369.274658153013	-2370.6445496461865	40.092607072605404	65.37897263728969	709.2431056831064	127.42317385100401	['Fragmented', 'Unclassified', 'Hover-Continuous-Mix']	151.73103313213147	0.4871428571428571	2.435844217523888	5.323687052836455	1.0	False	0.2967961052128996	0.0	0.0
cor	2	2	105	0 days 00:33:03.335491660	0 days 00:33:03.474824983	0.139333323	True	9.0	79.0	0.375	1.0	51.298701298701296	275.52192936515297	197.21926955230813	0.3932594833812959	0.3932594833812959	0.0651011457800974	0.03198320453596526	166.98664475213158	491.47240010716615	384.5829699697496	384.63057399691087	167.3799042355129	182.37990423551292	71.79770714609003	53.848280359567525	['Unclassified', 'Hover-Continuous-Mix', 'Continuous']	41.06336296747253	0.13183673469387755	2.056916150883672	4.947434495408354	2.0	True	0.9772594628679102	0.128	0.9142857142857144	170.2784577662668	514.1539999826157	420.63833104142054	420.68969030912126	170.67196800253504	[185.671968]	65.81456488391586	0.012	0.138	9.0	72.0	0.3875	51.13636363636364
cor	2	2	106	0 days 00:33:04.211491595	0 days 00:33:04.261491591	0.049999996000000005	True	9.0	16.0	0.5	0.0	29.09090909090909	275.3167284119924	197.22027971223548	0.3845553478543344	0.3845553478543344	0.22189451715402453	0.18567462069001064	1.0986414569563356	0.0	0.0657523728140588	-8.988365607365267e-15	1.4831968048106696	1.4831968048106696	3.3306690738754696e-15	2.220446049250313e-16	['Hover-Continuous-Mix']	13.05213188233389	0.04190476190476191	3.191178511822352	6.3929321439201345	1.0	False	0.2946254009946571	0.0	0.0
cor	2	2	107	0 days 00:33:05.527491497	0 days 00:33:05.578158160	0.050666663	True	7.0	22.0	0.0	1.0	40.0	275.41199029513047	197.1833208632509	0.4250603616479923	0.4250603616479923	0.2670166282250668	0.45565107214829104	1.0581364431626776	0.0	-0.2474815034793361	-6.8212102632969615e-15	1.4831968048106696	1.4831968048106696	2.4424906541753444e-15	2.220446049250313e-16	['Hover-Continuous-Mix']	18.984919101576573	0.06095238095238095	1.6052929904529745	2.8196357698313785	1.0	False	0.4497785871475377	0.0	0.0
cor	2	2	108	0 days 00:33:06.883491396	0 days 00:33:06.978158056	0.09466666	True	10.0	43.0	0.22142857142857145	1.0	41.58607350096712	275.87999999999994	196.09376172241667	1.53140277274806	1.53140277274806	0.6626959520157232	0.25906286119180605	9.442985335626084	441.8033035606249	0.897653112937772	2.999397420740508e-13	10.95041045253835	10.950410452538348	41.52951053469879	0.0	['Hover-Continuous-Mix', 'Continuous']	23.16311605810705	0.07436676798378929	1.97856874276201	5.151047196335691	2.0	True	0.9531107521927621	0.07200000000000001	0.7659574468085106	12.32395608735289	576.7921408316671	0.8837902042980142	4.168517383125921e-13	13.84317017823292	[13.84317018]	41.52951053469879	0.022000000000000002	0.092	9.0	38.0	0.25	47.97979797979797
cor	2	2	109	0 days 00:33:10.292157810	0 days 00:33:10.471491130	0.17933332000000002	True	10.0	198.0	0.4721362229102167	2.0	100.0	275.8808559457314	197.1858862673121	0.4400784247446803	0.4400784247446803	0.7974693444046541	0.2570970726750147	112.99079229883772	855.5598525554947	-791.4541637191272	-790.2673191404667	113.4308707235824	217.9132744314257	160.03393616786326	142.24811744528245	['Hover-Continuous-Mix', 'Unclassified', 'Hover-Continuous-Mix', 'Continuous', 'Hover-Continuous-Mix', 'Unclassified']	58.470914038536165	0.18772486772486774	3.6027350110573213	7.056080302189582	3.0	True	0.9053213920036102	0.05	0.2777777777777778	89.84214223850636	471.8835406579825	-415.6230798510999	-414.1662411601907	90.32825189357894	[173.76721954]	26.62855634210487	0.106	0.154	9.0	63.0	0.5	114.54545454545456
cor	2	2	110	0 days 00:33:11.955491020	0 days 00:33:12.058157679	0.102666659	True	9.0	45.0	0.375	1.0	40.106951871657756	275.88185441329915	197.30522885174904	0.3208572157841423	0.3208572157841423	0.09515362525921167	0.6141243280597332	11.922786996476491	145.41145145202645	-145.50879108654047	-145.41145145202626	12.243644212260628	12.243644212260625	14.831968048106726	14.831968048106699	['Hover-Continuous-Mix', 'Unclassified', 'Hover-Continuous-Mix']	83.46617313346319	0.2679738562091503	2.555733420889684	5.969343033361532	1.0	False	0.7277229278398545	0.0	0.0
cor	2	2	111	0 days 00:33:14.180157521	0 days 00:33:14.286824180	0.106666659	True	10.0	84.0	0.42857142857142855	1.0	70.7070707070707	275.31199559282004	196.85662640705448	0.7477754199510691	0.7477754199510691	0.3318343114029923	2.125061272281193	39.738004029880905	604.2653649228655	601.117056544766	604.2653649228648	40.48577944983197	40.48577944983197	62.29426580204819	62.29426580204812	['Continuous']	29.99353538617132	0.0962962962962963	2.6985730286793346	6.775151346905773	2.0	True	0.9945298204322016	0.10800000000000001	1.0	39.738004029880905	604.2653649228655	601.117056544766	604.2653649228648	40.48577944983197	[40.48577945]	62.29426580204819	0.0	0.106	10.0	84.0	0.42857142857142855	70.7070707070707
cor	2	2	112	0 days 00:33:14.332824177	0 days 00:33:14.416824170	0.08399999300000001	True	10.0	93.0	0.5357142857142857	2.0	100.64935064935064	275.51344413647803	196.40934734482488	1.2022938841429585	1.2022938841429585	0.5974553427501356	2.1851332056919297	124.75832129349048	2662.784842463194	-1114.1627601534508	-1111.9496416296938	125.96061517763346	247.5892581563163	222.1970014299657	91.92684455980472	['Unclassified', 'Hover-Continuous-Mix', 'Unclassified']	105.58948681866434	0.3390022675736961	2.7062332394382467	7.108979249346419	2.0	False	0.6840445967616945	0.0	0.0
cor	2	2	113	0 days 00:33:14.616157489	0 days 00:33:14.658824152	0.042666663	True	5.0	8.0	0.0	0.0	16.528925619834713	275.77956277034014	196.0272375769654	1.5941139062540859	1.5941139062540859	1.2101031922110128	2.2373725490772793	0.11091710144341613	0.0	0.6629089431230211	-2.5837917664003644e-15	1.48319680481067	1.48319680481067	0.0	0.0	['Hover']	5.93278721924268	0.019047619047619046	1.6900469986655933	3.3267875031316168	1.0	False	0.06419704846150306	0.0	0.0
cor	2	2	114	0 days 00:33:20.622823710	0 days 00:33:20.711490370	0.08866666000000001	True	9.0	32.0	0.225	0.5	33.057851239669425	272.6984225050562	188.3565159830632	9.143903107817136	9.143903107817136	2.9401336415159816	6.709900821317576	18.160401708015648	404.50821949381896	-73.9008377310305	-67.41803658230315	27.30430481583279	27.30430481583279	35.5967233154561	5.93278721924268	['Continuous', 'Hover-Continuous-Mix', 'Unclassified']	77.73299617939554	0.2495670995670996	1.6898532392401755	3.7585266093769216	1.0	True	0.9251725846691568	0.068	0.7727272727272727	20.674131554767577	443.17856315446363	-6.429553021207068	-2.1399875335833608e-13	29.75118296708461	[29.75118297]	29.663936096213412	0.0	0.066	9.0	30.0	0.225	40.106951871657756
cor	2	2	115	0 days 00:33:28.650823114	0 days 00:33:28.711489776	0.060666662	True	3.0	19.0	0.6923076923076923	1.0	28.78787878787879	279.23373444217697	120.80006717683388	76.89790195551895	76.89790195551895	0.9778998871394754	5.984931226853262	1.711528699446569	0.0	3.8061970959616582	3.581135388230903e-13	78.6094306549655	78.6094306549655	7.105427357601003e-14	1.4210854715202004e-14	['Hover']	15.128607409068833	0.04857142857142858	1.9388087874451687	3.3349496789786834	2.0	False	0.08675608709692875	0.0	0.0
cor	2	2	116	0 days 00:33:29.222156405	0 days 00:33:29.308823065	0.08666666	True	6.0	30.0	0.0	1.0	30.991735537190085	281.33324802911096	120.78452573481779	76.99216064876519	76.99216064876519	2.142206053898429	3.019303084300226	1.3491236034210228	0.0	3.3032122804902317	0.0	75.64303704534416	75.64303704534414	0.0	0.0	['Hover-Continuous-Mix', 'Hover']	24.809837462287565	0.07965367965367964	1.2348190723384531	2.6050445849789705	1.0	False	0.3035057905918003	0.0	0.0
cor	2	2	117	0 days 00:33:34.602156005	0 days 00:33:34.645489335	0.04333333	True	6.0	6.0		0.0	12.396694214876034	246.2045781295875	108.90591474184464	115.5639214207868	253.62886750469715	3.021673426895453	24.69370430426629	114.35078630698082	135.9805059585045	-135.98050595850376	-135.9805059585051	170.83769424417204	185.837694244172	5.9831422621741694	5.9831422621741694	['Hover-Continuous-Mix']	51.2377078025504	0.16450216450216448	1.5121009626523654	3.2018308803640103	1.0	False	0.5133836135729111	0.0	0.0
cor	2	2	118	0 days 00:33:53.422821275	0 days 00:33:53.533487933	0.110666658	True	8.0	28.0	0.25	0.0	23.140495867768593	288.52023615707435	112.97289383902944	93.81498416642941	108.81498416642941	3.046998007278403	-7.567280870606845	1.8462794548872985	0.0	0.945744413670884	0.0	95.66126362131668	110.66126362131668	1.1368683772161605e-13	0.0	['Hover-Continuous-Mix']	44.33410085652256	0.14233766233766235	1.4073802824207866	3.23372498517446	2.0	False	0.3554703956750153	0.0	0.0
cor	2	2	119	0 days 00:33:53.540821266	0 days 00:33:53.634154592	0.093333326	True	9.0	23.0	0.0	0.0	22.72727272727273	288.34122346476437	113.35096891068196	93.66722433362459	108.66722433362459	3.0781331903908407	-7.8574623353870034	1.9940392876920785	0.0	1.764506594677512	0.0	95.6612636213167	110.66126362131668	1.1368683772161605e-13	0.0	['Hover-Continuous-Mix']	45.076285502724254	0.14472049689440988	1.586555282687936	3.148113698780066	2.0	False	0.345668050969406	0.0	0.0
cor	2	2	120	0 days 00:34:02.811487244	0 days 00:34:02.872820573	0.06133332900000001	True	7.0	29.0	0.0	1.0	42.52199413489736	275.87999999999994	196.08	1.5451548164295381	1.5451548164295381	0.02628381426899454	-0.491716032937757	0.0619580116188682	0.0	-9.163709217964129e-13	-3.667317345858581e-15	1.4831968048106692	1.4831968048106692	0.0	0.0	['Hover']	2.9663936096213384	0.009523809523809528	1.44320557064446	2.762869191182856	1.0	False	0.01954984803941414	0.0	0.0
cor	2	2	121	0 days 00:34:03.368153870	0 days 00:34:03.433487198	0.06533332800000001	True	10.0	37.0	0.0	1.0	50.96418732782371	275.88	196.07999999999996	1.545154816429577	1.545154816429577	0.0009246516553572466	-0.1282740796516781	0.061958011618907134	0.0	-4.304704740813274e-13	-1.7225278442669098e-15	1.4831968048106698	1.4831968048106698	0.0	0.0	['Hover-Continuous-Mix']	22.292897429881577	0.07157287157287158	3.8268985241961606	7.634958167750227	1.0	False	0.4371478083796521	0.0	0.0
cor	2	2	122	0 days 00:34:05.436820383	0 days 00:34:05.526153710	0.08933332699999999	True	8.0	38.0	0.16666666666666666	1.0	39.256198347107436	275.8799308811264	196.18943832979406	1.4357908636940862	1.4357908636940862	0.07341646608643777	0.015834375956970025	0.04879214830782639	0.0	-0.11157535067805237	-1.2918958832001822e-15	1.4831968048106696	1.4831968048106696	3.996802888650564e-15	0.0	['Hover']	2.966393609621339	0.009523809523809526	1.2473280902528276	3.6601038336029377	1.0	False	0.02115609079633031	0.0	0.0
cor	2	2	123	0 days 00:34:06.986153601	0 days 00:34:07.242820249	0.256666648	True	11.0	211.0	0.4558823529411765	2.0	74.34813248766739	275.88000000000005	196.08	1.545154816429556	1.545154816429556	0.0002644211654500085	0.03593616401376379	121.14231117987728	2244.1778929660954	769.2208801562099	769.7011748199221	122.66921479908581	196.51538960040563	379.3711359061659	198.5829031035407	['Hover-Continuous-Mix', 'Unclassified', 'Fragmented', 'Unclassified', 'Hover-Continuous-Mix', 'Unclassified', 'Hover-Continuous-Mix', 'Unclassified']	177.2937575982986	0.5692137320044298	2.466103094336257	6.282894727146858	4.0	False	0.7319342069356015	0.0	0.0
cor	2	2	124	0 days 00:34:07.923486865	0 days 00:34:08.124153517	0.200666652	True	11.0	91.0	0.0	1.0	41.36363636363637	275.88000000000017	196.08000000000007	1.545154816429556	1.545154816429556	1.0379624720871927e-12	0.02011527303682037	61.74412995981453	385.6311692507742	385.0115891345851	385.6311692507747	63.2731756932232	63.27317569322318	77.12623385015492	77.12623385015483	['Hover-Continuous-Mix', 'Unclassified', 'Hover-Continuous-Mix', 'Unclassified', 'Hover-Continuous-Mix', 'Unclassified']	101.71763687391571	0.32657142857142857	2.0420557351351287	7.7002109609783425	2.0	False	0.7939536049686838	0.0	0.0
cor	2	2	125	0 days 00:34:10.054820040	0 days 00:34:10.188153363	0.133333323	True	11.0	83.0	0.3333333333333333	1.0	57.162534435261705	275.87999999990797	196.08000000000004	1.5451548164260611	1.5451548164260611	0.010147173275183451	-0.01177144486489625	89.00442242453043	18504.31301321896	1.951279541985555e-11	1.9733278983921714e-11	90.51953699289885	120.394981735428	4028.836729702915	0.0	['Unclassified', 'Fragmented-Continuous-Mix', 'Fragmented', 'Unclassified']	263.11012410186845	0.8447330447330448	1.7013439945347142	4.148586226539123	2.0	False	0.2306732235512873	0.0	0.0
cor	2	2	126	0 days 00:34:10.577486668	0 days 00:34:10.640153330	0.062666662	True	8.0	29.0	0.5555555555555556	1.0	42.52199413489736	275.88	196.08	1.5451548164295397	1.5451548164295397	0.04807500239488347	-0.01816859350242941	0.061958011618870025	0.0	9.160271107952388e-13	-3.667317345858581e-15	1.4831968048106692	1.4831968048106692	0.0	0.0	['Hover']	4.784505821969902	0.015360983102918587	2.058620676724391	4.803683583278059	1.0	False	0.04555224822193405	0.0	0.0
cor	2	2	127	0 days 00:34:14.638153033	0 days 00:34:14.771486357	0.133333324	True	11.0	75.0	0.1944444444444444	1.0	50.88195386702849	275.85978250793886	196.91164813842872	0.7133334616382441	0.7133334616382441	0.5585054852052321	1.9500637049682152	86.90081747623016	1313.5358181277347	-223.12699214100672	-221.7002714187439	87.61415093786844	136.0832377116897	241.26818757350654	11.82167416458708	['Unclassified', 'Hover-Continuous-Mix', 'Continuous', 'Hover-Continuous-Mix', 'Unclassified']	107.4542879186715	0.34498933901918977	2.784312032356706	7.1971404820134115	3.0	True	0.8804508796084376	0.054000000000000006	0.4029850746268657	88.5000659935432	346.78655200636115	244.5026236308479	246.38649943329145	89.24858906686444	[176.17836993]	35.54028010641032	0.07	0.122	10.0	44.0	0.0	74.07407407407408
cor	2	2	128	0 days 00:34:14.789486355	0 days 00:34:14.874819682	0.08533332699999999	True	10.0	83.0	0.6190476190476191	2.0	87.73784355179703	275.92340059062303	196.58423441358147	1.0429024833435945	1.0429024833435945	0.7307680036081856	2.1266832499083983	163.719145702819	930.8685512686487	927.3251822629593	930.8685512686493	164.7620481861626	302.82699427007293	71.15972925253698	71.15972925253664	['Unclassified', 'Hover-Continuous-Mix', 'Unclassified', 'Hover-Continuous-Mix', 'Unclassified']	86.16338647481518	0.2766334440753045	2.703799944505123	7.331961547177634	1.0	False	0.7196631731886591	0.0	0.0
cor	2	2	129	0 days 00:34:20.134819292	0 days 00:34:20.190152621	0.055333329	True	7.0	30.0	0.5277777777777778	1.0	50.5050505050505	280.10558760675093	196.2585264383144	1.5252062715468842	1.5252062715468842	0.6435862494693213	-0.4573600550152632	4.3873691887478365	219.73285997195103	217.9160525260256	219.73285997195072	5.877854004249692	5.8778540042496905	11.865574438485364	11.86557443848536	['Hover-Continuous-Mix']	23.29168315702681	0.07477954144620813	1.4071923295737163	3.2053976668160917	1.0	False	0.695987124045537	0.0	0.0
cor	2	2	130	0 days 00:34:30.485485190	0 days 00:34:30.536818519	0.051333329	True	6.0	20.0	0.0	1.0	34.96503496503497	275.2861359743977	182.30793671448083	15.28526320497365	15.28526320497365	1.7951616476830028	-0.2704920827688157	13.802066400162984	0.0	-8.367589633110141	-2.1862853408003088e-15	1.4831968048106696	1.4831968048106696	0.0	0.0	['Hover-Continuous-Mix']	62.9788181734992	0.2021978021978022	2.7108186160830927	5.2792203179938415	1.0	False	0.3921637160316624	0.0	0.0
cor	2	2	131	0 days 00:34:39.294817869	0 days 00:34:39.394817862	0.099999993	True	10.0	104.0	0.5857142857142856	2.0	94.54545454545456	277.4814036762286	198.33229867326682	0.0	0.0	0.2463827325184579	2.391715590430854	112.41085238162056	532.9739964900931	-532.9739964900939	-532.9739964900939	112.41085238162056	250.47579846553074	53.29739964900928	53.29739964900928	['Unclassified', 'Hover-Continuous-Mix', 'Unclassified', 'Hover-Continuous-Mix', 'Unclassified']	77.00757810576997	0.2472380952380953	2.9049208128911985	6.4267767032759675	1.0	False	0.5852594967228096	0.0	0.0
cor	2	2	132	0 days 00:34:48.144150546	0 days 00:34:48.214150540	0.06999999400000001	True	10.0	40.0	0.16666666666666666	1.0	51.948051948051955	284.3073230529487	119.4481822915452	78.43908697561609	78.43908697561609	2.9941252840145323	31.047313062993197	0.1703436793494077	0.0	1.7714854378078317	2.0788450326238362e-13	78.6094306549655	78.6094306549655	9.947598300641404e-14	1.4210854715202004e-14	['Hover']	14.831968048106694	0.047619047619047616	2.5514875461946938	5.002362551780662	2.0	False	0.15694293584229482	0.0	0.0
cor	2	2	133	0 days 00:34:50.990817001	0 days 00:34:51.064816996	0.073999995	True	7.0	25.0	0.35	0.0	30.712530712530715	280.45972407475284	118.47707136968924	79.2652365021287	79.2652365021287	2.4781848419737256	6.6215248953429136	27.491295033183214	1580.4261912457891	1483.2135627525427	1580.426191245787	100.92985610527685	104.17309934852005	116.95153815218843	116.95153815218843	['Unclassified', 'Hover-Continuous-Mix']	72.5563842353328	0.2329472329472329	1.6759003776713428	4.142853370369009	1.0	False	0.2100326838985444	0.0	0.0
cor	2	2	134	0 days 00:34:52.602150215	0 days 00:34:52.686150209	0.08399999400000001	True	9.0	34.0	0.29166666666666663	1.0	36.7965367965368	289.3447393921788	113.8983410378287	94.71182806818493	109.71182806818494	1.3213239743832002	3.8325459917680456	3.702535250931098	0.0	2.3649330307622347	-1.7323708605198632e-13	98.41436331911603	113.41436331911603	8.526512829121202e-14	0.0	['Unclassified', 'Hover-Continuous-Mix', 'Unclassified']	142.95192061603788	0.4589569160997733	1.7348523444843096	5.410404408814832	1.0	False	0.3310234258160405	0.0	0.0
cor	2	2	135	0 days 00:35:03.784149385	0 days 00:35:03.828816048	0.044666662999999995	True	9.0	52.0	0.7222222222222222	3.0	102.76679841897231	280.5093217366354	106.5632079375842	86.60823269939051	224.67317878330076	3.273998029941484	3.653174633304052	27.237161082698048	643.2310422356436	648.4586824177591	643.2310422356426	113.84539378208851	251.9103398659988	29.588627942839626	29.588627942839594	['Continuous', 'Hover-Continuous-Mix', 'Unclassified']	56.232504947604525	0.18053830227743276	2.7756999134931704	5.547171591198894	1.0	True	0.8699059506755107	0.036000000000000004	0.7826086956521741	23.02696151356513	769.1436701853049	785.9494875807762	780.7259328725473	109.66178909494238	[247.72673518]	26.623639223983933	0.0	0.034	8.0	40.0	0.875	101.010101010101
cor	2	2	136	0 days 00:35:04.779482644	0 days 00:35:04.898815969	0.119333325	True	9.0	97.0	0.5	1.0	73.48484848484848	280.84891454636016	104.93017554327551	86.35968698367931	224.4246330675896	0.960248380757534	5.7507999752672845	39.121919321660044	628.2490614461108	600.1107659211458	605.3065639656742	125.47078824217188	259.43356945661844	71.15429331645315	71.15429331645308	['Continuous', 'Fragmented-Continuous-Mix', 'Unclassified', 'Hover-Continuous-Mix', 'Unclassified']	59.77283123386997	0.19190476190476188	2.3383131311855765	6.9363153850216035	2.0	True	0.9045758227354956	0.05	0.4166666666666667	12.23918772239622	593.1030125599133	524.1990409749471	533.7006311191121	98.48263448513772	[226.70238488]	26.6850315559557	0.0	0.048	8.0	31.0	0.3333333333333333	56.36363636363637
cor	2	2	137	0 days 00:35:05.174149281	0 days 00:35:05.220149278	0.045999997	True	7.0	22.0	0.3333333333333333	1.0	43.47826086956522	281.33451694775835	104.75220593001288	86.03232647914366	101.03232647914369	0.8976464830981171	7.776781297428855	41.21398824682128	1354.2231696097415	1354.9997750777804	-1354.223169609744	44.818338232322375	44.818338232322425	41.52951053469881	41.52951053469881	['Unclassified', 'Hover-Continuous-Mix']	197.58760912782142	0.6343685300207038	1.6448416522650025	3.2298580023702965	1.0	False	0.4476953356273258	0.0	0.0
cor	2	2	138	0 days 00:35:06.048149217	0 days 00:35:06.085482547	0.037333330000000005	True	7.0	26.0	0.4166666666666666	1.0	62.20095693779904	280.44002049069985	104.88000010799637	86.77073372002856	224.83567980393883	2.667524836753385	15.009546962528699	20.16923101241392	855.7948033596753	622.5980194188409	622.5960659244251	106.93996473244249	245.00491081635272	35.474053201847475	23.65865050512821	['Hover-Continuous-Mix', 'Unclassified']	109.13205963817455	0.35037593984962395	1.9225639910314989	3.8794187616221913	1.0	False	0.7907474238382035	0.0	0.0
cor	2	2	139	0 days 00:35:18.243481645	0 days 00:35:18.332148305	0.08866666000000001	True	9.0	60.0	0.42857142857142855	1.0	61.98347107438017	243.3741245527565	193.1645348285436	198.79184409058843	336.85679017449866	3.31651605833132	-7.045513837335902	23.274548382208252	3255.176015368421	5.871493413194735	-1.0756325123524716e-11	176.86803845154608	312.13605394264033	434.4055225790768	2.8421709430404014e-14	['Hover-Continuous-Mix', 'Unclassified', 'Hover-Continuous-Mix', 'Continuous', 'Hover-Continuous-Mix', 'Unclassified', 'Fragmented-Continuous-Mix', 'Unclassified']	124.25144142118471	0.39891774891774895	1.6739356223707356	5.9427508298362275	1.0	True	0.8316183329963815	0.018000000000000002	0.20454545454545456	28.366030480355832	1014.834128372418	1065.0723088229138	-1070.6903706978887	170.41621271979437	[308.4811588]	20.75492103198985	0.032	0.048	9.0	27.0	0.5833333333333333	136.36363636363637
cor	2	2	140	0 days 00:35:28.368147560	0 days 00:35:28.400814224	0.032666664000000005	False	3.0	5.0	0.5	0.0	13.368983957219253	276.9247959934084	121.0449949276288	76.56656520738501	76.56656520738501	1.938601579345005	-18.614639573667425	117.39514616214579	130.80832583186898	131.44471570147	130.8083258318654	193.96171136953075	332.02665745344103	2.9649887188556363	2.9649887188556363	['Unclassified']	254.93535668569274	0.8184873949579832	1.7854195738407266	3.239052049227721	1.0	False	0.3743541061664213	0.0	0.0
cor	2	2	141	0 days 00:35:37.273480232	0 days 00:35:37.337480227	0.063999995	True	6.0	12.0	0.2	0.0	17.045454545454547	275.88	196.08	1.5451548164295348	1.5451548164295348	2.8727337611008354e-10	-0.4924964959414982	0.061958011618865085	0.0	4.4364512064021255e-13	-1.7763568394002505e-15	1.4831968048106698	1.4831968048106698	0.0	0.0	['Hover']	5.932787219242679	0.01904761904761905	1.424374294211031	3.9793718677761114	1.0	False	0.0685253882896717	0.0	0.0
cor	2	2	142	0 days 00:35:38.814813451	0 days 00:35:38.906146777	0.09133332599999999	True	9.0	66.0	0.4166666666666666	1.0	66.66666666666667	275.8799999999998	196.07999999999996	1.545154816429588	1.545154816429588	0.0	0.001973793057833776	179.0831358567547	0.0	3.2337589396370783e-13	-1.6168794698185392e-13	180.62829067318424	195.62829067318432	0.0	0.0	['Hover-Continuous-Mix']	22.149072285172664	0.07111111111111111	2.5043557764739024	3.8770324110213514	2.0	False	0.4198011394929029	0.0	0.0
cor	2	2	143	0 days 00:35:39.030813435	0 days 00:35:39.092146763	0.06133332800000001	True	11.0	67.0	0.5555555555555556	2.0	101.51515151515152	275.88	196.07999999999996	1.5451548164296094	1.5451548164296094	1.4383136237140382e-13	0.004607984759497086	157.01110302794208	0.0	0.0	-2.425319204727809e-13	158.55625784437157	296.6212039282819	0.0	0.0	['Hover-Continuous-Mix', 'Unclassified']	61.89874665409861	0.19873015873015876	3.6024164948480113	7.377195442273147	1.0	False	0.4627675179166365	0.0	0.0
cor	2	2	144	0 days 00:35:40.988146623	0 days 00:35:41.143479944	0.155333321	True	9.0	67.0	0.19886363636363635	1.0	39.04428904428904	275.88000000000017	196.08000000000007	1.545154816429423	1.545154816429423	2.7552885325974266e-11	-0.004011637186812207	41.14967701802278	712.9719763790787	550.6104306936378	551.4047641759299	42.678945164806365	60.95650235505127	108.26977764080964	86.0191432114451	['Hover-Continuous-Mix', 'Continuous', 'Hover-Continuous-Mix', 'Unclassified']	142.61507738564129	0.4578754578754577	1.6581003186785968	4.4757247504800945	1.0	True	0.8894847382182606	0.055999999999999994	0.35897435897435903	18.076359394146824	476.7304873839362	474.529043988472	476.74183011771487	19.599386349283854	[19.59938635]	26.69754248659207	0.01	0.064	7.0	22.0	0.3666666666666667	35.714285714285715
cor	2	2	145	0 days 00:35:41.252813270	0 days 00:35:41.290146600	0.037333330000000005	False	8.0	24.0	0.375	1.0	60.60606060606061	275.87999999999994	196.08	1.545154816429559	1.545154816429559	2.554305363431373e-10	-0.004725993056157543	0.06195801161888916	0.0	-7.890971826580225e-13	-3.1579677144893344e-15	1.48319680481067	1.48319680481067	0.0	0.0	['Unclassified']	249.5066624981504	0.8010582010582009	2.433831511228922	4.109585824552417	1.0	False	0.14400494303904915	0.0	0.0
cor	2	2	146	0 days 00:35:43.866146409	0 days 00:35:44.040813063	0.17466665399999998	True	11.0	170.0	0.5508620689655173	2.0	87.80991735537191	275.5204835385361	196.08	1.5316735617889323	1.5316735617889323	0.4022388567466146	-0.0035123316784558727	110.33416648296014	1859.5745626158787	1085.3308020414204	1085.8601045041016	111.86071648241514	211.7253937924873	327.28512302068884	191.11137839272197	['Unclassified', 'Hover-Continuous-Mix', 'Continuous', 'Unclassified', 'Hover-Continuous-Mix', 'Unclassified']	122.70082657979174	0.3939393939393939	2.8918059296176786	6.785072815691402	2.0	True	0.923952690574506	0.057999999999999996	0.3295454545454545	134.94364665958366	361.17416665026377	357.7085248047765	357.84346606879035	136.47220393841195	[274.53715002]	20.75492103198991	0.026000000000000002	0.08199999999999999	10.0	88.0	0.6	137.9310344827586
cor	2	2	147	0 days 00:35:44.088813059	0 days 00:35:44.148146388	0.059333329	False	8.0	35.0	0.45	1.0	54.858934169279	275.84613585097856	196.08	1.5438849685502518	1.5438849685502518	0.5187544868440938	-0.003167395498020629	115.61590984682287	408.0998025828295	408.0552070010082	408.09980258282906	117.15979481537316	255.2247408992835	23.66978854980418	23.669788549804093	['Unclassified']	242.52824994524812	0.7786535303776684	2.50280017411841	5.556651558265674	2.0	False	0.4911564933283518	0.0	0.0
cor	2	2	148	0 days 00:35:44.168813053	0 days 00:35:44.230146382	0.06133332900000001	True	10.0	45.0	0.75	1.5	68.18181818181817	275.91093952504065	196.08	1.5463149958934617	1.5463149958934617	0.5273217949914928	-0.0030378645021644783	137.15113212867308	3679.744132747375	863.1182660059	864.1938675013204	138.6932114633648	272.15599267781147	284.49623489056506	11.859954875422744	['Unclassified', 'Fragmented', 'Fragmented-Continuous-Mix']	197.46293461379383	0.6339682539682541	2.2161948208366757	3.2679445629863544	1.0	False	0.5131653296413132	0.0	0.0
cor	2	2	149	0 days 00:35:46.854146187	0 days 00:35:46.904146183	0.049999996000000005	False	7.0	36.0	0.55	1.0	65.45454545454545	275.23266378831323	196.0915936146621	1.5092953508637532	1.5092953508637532	0.1729409875541656	-0.0034405938055792613	54.085315150712596	1245.8853160409622	1244.8324217585232	1245.8853160409622	55.59021624430388	55.59021624430388	62.29426580204816	62.294265802048095	['Unclassified']	243.60024322210438	0.7820952380952382	2.0541403003610896	3.2304017949347057	1.0	False	0.3250720410065986	0.0	0.0
cor	2	2	150	0 days 00:35:46.920812849	0 days 00:35:47.028146174	0.107333325	True	11.0	94.0	0.4147727272727273	2.0	80.61749571183533	275.4064379602588	196.10450158684367	1.5029126922810592	1.5029126922810592	0.15489863968966347	-0.0032004642646705807	150.5224568288101	4657.999196956186	1046.6681836291687	1046.5626034716418	152.02536952109125	173.70829099753888	587.5165466828628	71.43999999615846	['Fragmented', 'Fragmented-Continuous-Mix', 'Unclassified', 'Continuous', 'Hover-Continuous-Mix']	139.70034810594078	0.44851752021563335	4.402220040117541	9.226567579392693	2.0	True	0.8917940250094066	0.046	0.4339622641509434	173.14663026079015	471.3417609272255	455.3717162801287	455.2390851654257	174.6451484110101	[189.64514841]	20.940997917609593	0.057999999999999996	0.102	9.0	36.0	0.25	71.14624505928855
cor	2	2	151	0 days 00:35:48.854146039	0 days 00:35:48.946146032	0.091999993	True	10.0	35.0	0.07142857142857142	1.0	34.58498023715415	275.87999999999994	196.08	1.545154816429546	1.545154816429546	0.03232703831289077	-0.005534280171984922	18.964347007110103	451.4077232032474	159.19667405706588	161.21704400115996	20.50680799694752	20.50680799694752	35.59672331545608	11.86557443848536	['Continuous']	26.826516121792984	0.08612836438923396	2.119256926701204	7.778621921375384	1.0	True	0.917375059148326	0.092	1.0	18.964347007110103	451.4077232032474	159.19667405706588	161.21704400115996	20.50680799694752	[20.506808]	35.59672331545608	0.0	0.09	10.0	35.0	0.07142857142857142	34.58498023715415
cor	2	2	152	0 days 00:35:49.298812672	0 days 00:35:49.433479329	0.134666657	True	10.0	108.0	0.4365079365079365	1.0	73.27001356852105	275.87996892950736	196.08000000000413	1.5451536513348552	1.5451536513348552	0.434828795531921	-0.0060945386837356974	127.21986617045499	2797.5327460118892	-1403.571450817796	-1404.9585480402593	128.76317037201642	264.7674456188533	320.05276719687924	88.97299388562494	['Unclassified', 'Hover-Continuous-Mix', 'Unclassified', 'Hover-Continuous-Mix', 'Unclassified']	95.85436066910745	0.30774697938877044	2.0598339593920514	5.175143957729853	2.0	False	0.7966022734777757	0.0	0.0
cor	2	2	153	0 days 00:35:50.370145926	0 days 00:35:50.497479250	0.127333324	True	9.0	48.0	0.2222222222222222	1.0	34.09090909090909	274.7398277696816	196.0800000043545	1.5024002964475718	1.5024002964475718	0.3597437525357742	0.0016911796432220185	42.54140636685216	602.5487019543347	602.2491866118785	602.548701954334	44.032405142816756	44.032405142816756	77.12623385015492	77.12623385015483	['Hover-Continuous-Mix', 'Unclassified', 'Fragmented-Continuous-Mix', 'Unclassified', 'Hover-Continuous-Mix']	116.66269867838922	0.3745535714285714	1.9845123750691824	3.248794108278441	4.0	False	0.6035512356109234	0.0	0.0
cor	2	2	154	0 days 00:35:51.468812511	0 days 00:35:51.568812504	0.099999993	True	9.0	48.0	0.3333333333333333	1.0	43.63636363636364	275.8971774480947	196.08	1.5457989414604218	1.5457989414604218	0.7867750541348816	0.01397782819585247	0.06260213664975196	0.0	0.009000974403424802	-1.1368683772161605e-15	1.48319680481067	1.48319680481067	0.0	0.0	['Hover']	7.831279129400335	0.025142857142857144	1.9896918148804643	4.146073064927837	3.0	False	0.11631846439069153	0.0	0.0
cor	2	2	155	0 days 00:35:55.424145551	0 days 00:35:55.526145543	0.101999992	True	10.0	101.0	0.5357142857142857	2.0	90.01782531194296	274.97934295888354	196.07999999999996	1.5113817122281608	1.5113817122281608	0.25065210359182616	0.24012672852867595	103.38076439448572	1160.5957472647826	539.8027388307971	539.7987565859751	104.89214610671387	124.71822242372996	104.61526773215833	55.059473171769504	['Unclassified', 'Hover-Continuous-Mix', 'Continuous', 'Hover-Continuous-Mix', 'Unclassified']	105.91770123765605	0.34005602240896354	5.291527424308534	8.507814487231649	1.0	True	0.8692399641444288	0.052000000000000005	0.5098039215686274	102.09166534004642	379.73358232459066	-370.60471155857874	-370.60957470376036	103.60289736496873	[118.60289736]	19.271697884595625	0.022000000000000002	0.07200000000000001	10.0	65.0	0.6666666666666666	113.63636363636364
cor	2	2	156	0 days 00:35:55.534812209	0 days 00:35:55.583478872	0.048666663000000006	True	11.0	47.0	0.5	1.5	89.01515151515152	275.01016090542225	196.08	1.5125373327053933	1.5125373327053933	0.18536663468526013	0.2526246605536325	160.0087092305219	0.0	-0.034220122756390005	-3.031649005909761e-13	161.52124656322732	299.58619264713764	0.0	0.0	['Unclassified', 'Hover-Continuous-Mix', 'Unclassified']	64.14826180806146	0.20595238095238094	3.377933723463767	8.571266055264509	1.0	False	0.4244291794388256	0.0	0.0
cor	2	2	157	0 days 00:35:58.103478685	0 days 00:35:58.137478683	0.033999998000000003	True	7.0	25.0	0.29166666666666663	1.0	66.84491978609626	275.47185530910457	195.08913445025112	2.5200187517211443	2.5200187517211443	0.9377750206387878	-0.08885558270156553	175.64462510762672	351.9495448337761	-350.1494930415808	-351.94954483377535	178.1646438593478	193.16464385934785	11.96628452434834	11.96628452434834	['Continuous']	27.046529970076925	0.08683473389355742	3.0773251516259745	4.986190407470779	1.0	True	0.946921779020972	0.034	1.0	175.64462510762672	351.9495448337761	-350.1494930415808	-351.94954483377535	178.1646438593478	[193.16464386]	11.96628452434834	0.0	0.032	7.0	25.0	0.29166666666666663	66.84491978609626
cor	2	2	158	0 days 00:35:58.140812016	0 days 00:35:58.198812012	0.05799999600000001	True	7.0	37.0	0.4	1.0	57.99373040752351	275.3612512812573	195.18733719090145	2.4177376153247536	2.4177376153247536	1.0064069539949083	-0.1055262431668348	155.20640263605196	283.6834693272248	-178.2559335122269	-180.52584411732448	157.62414025137667	172.62414025137667	14.957855655435425	8.974713393261254	['Continuous', 'Hover-Continuous-Mix']	31.709724792503966	0.1018062397372742	3.733748900441256	7.245797931974577	1.0	True	0.946818146016744	0.042	0.7241379310344828	155.54183068780432	375.75951901318433	-247.10177198068212	-249.29759425725769	157.97782353781062	[172.97782354]	14.957855655435425	0.0	0.04	7.0	29.0	0.5	62.770562770562776
cor	2	2	159	0 days 00:35:59.169478606	0 days 00:35:59.372145258	0.202666652	True	10.0	132.0	0.3666666666666667	1.0	59.4059405940594	274.725728796248	196.08	1.501871613321876	1.501871613321876	0.6983029997920029	-0.3612935847328101	55.051225793425424	528.6642076552881	146.65496214125008	146.8511687931355	56.55238510223649	56.55238510223649	106.79016994636841	29.663936096213398	['Unclassified', 'Hover-Continuous-Mix', 'Unclassified', 'Hover-Continuous-Mix', 'Continuous']	84.29257088725984	0.27062706270627057	3.2951986534000386	9.250543528773523	3.0	True	0.971109485086164	0.1	0.4950495049504951	48.5697955168059	354.38535958385023	-356.0003628594392	-355.9672331545607	50.07272413040819	[50.07272413]	35.59672331545611	0.102	0.2	9.0	79.0	0.3333333333333333	71.81818181818183
cor	2	2	160	0 days 00:36:11.294144373	0 days 00:36:11.352811035	0.058666662	True	8.0	35.0	0.16666666666666666	1.0	53.03030303030303	276.0751456731898	187.93294055511532	9.693801996016589	9.693801996016589	2.4979332201812285	5.258933673593802	24.123085153666683	988.7978698737801	931.1527733092216	939.3579763800927	33.81688714968327	33.816887149683275	59.327872192426796	53.39508497318408	['Continuous', 'Hover-Continuous-Mix', 'Unclassified']	143.67233049266022	0.4612698412698413	1.5205557896609667	3.261757756459532	2.0	True	0.8360289827682161	0.034	0.5666666666666667	17.371236575305158	446.34429204052384	427.82779657026117	436.2343543560794	26.959283099205702	[26.9592831]	14.831968048106704	0.0	0.032	7.0	20.0	0.16666666666666666	53.47593582887701
cor	2	2	161	0 days 00:36:11.359477701	0 days 00:36:11.485477692	0.125999991	True	10.0	111.0	0.4641025641025641	2.0	80.08658008658007	275.90575008988134	187.2941505201046	10.325790718917256	10.325790718917256	1.6865164458867299	5.3169883522336985	110.01355566603222	1160.1357560832453	962.9102242686071	967.689314728366	120.33934638494944	252.067866464864	138.91973732670223	109.9110356826334	['Unclassified', 'Hover-Continuous-Mix', 'Unclassified', 'Hover-Continuous-Mix', 'Unclassified']	69.63962140682477	0.2235827664399093	2.7806838685350748	11.251326244470949	2.0	False	0.7474564102665814	0.0	0.0
cor	2	2	162	0 days 00:36:19.495477097	0 days 00:36:19.532143761	0.036666664	True	4.0	8.0	0.75	0.0	20.202020202020204	278.9661677265512	127.71912309222864	69.97367897452625	69.97367897452625	2.78813289726161	6.11142177026025	0.26342914842479304	0.0	-2.7495646081336407	0.0	69.71024982610146	69.71024982610146	0.0	0.0	['Hover-Continuous-Mix']	35.76152296043504	0.1148148148148148	2.500083452967277	3.883701564447062	1.0	False	0.3858255155402602	0.0	0.0
cor	2	2	163	0 days 00:36:20.250143708	0 days 00:36:20.303477037	0.053333329000000006	True	6.0	13.0	0.7	0.0	21.88552188552189	279.42754340269903	123.26639047916805	74.44058074486736	74.44058074486736	3.7160043565261853	3.5613427702938023	1.7180809789819518	54.93321499298778	-10.117635061333727	54.93321499298838	73.22597558565269	73.22597558565269	2.9663936096214063	2.966393609621377	['Hover-Continuous-Mix']	54.38388284305789	0.17460317460317462	1.6687523956819763	3.5249203060215515	1.0	False	0.3726317878837413	0.0	0.0
cor	2	2	164	0 days 00:36:22.831476850	0 days 00:36:22.862810181	0.031333331	True	2.0	4.0	1.0	0.0	11.363636363636365	279.1907022825862	121.5187543991118	76.17810655936209	76.17810655936209	3.254760952294805	7.068135039592249	15.367037562124658	0.0	13.054019289748958	0.0	60.811068997237435	60.811068997237435	0.0	0.0	['Hover-Continuous-Mix', 'Unclassified']	97.52018991630152	0.3130952380952381	1.7606129032173512	2.8194514518414997	1.0	False	0.4689108128139869	0.0	0.0
cor	2	2	165	0 days 00:36:29.074809720	0 days 00:36:29.125476382	0.050666662	True	6.0	13.0	0.25	1.0	23.63636363636364	280.67320830288963	116.52902626600596	81.21991682404165	81.21991682404165	1.618985608397112	10.749911887800462	3.3223010501665526	0.0	4.584436611392384	-2.842170943040401e-13	84.5422178742082	84.5422178742082	2.273736754432321e-13	0.0	['Hover']	19.696853567885693	0.06323809523809522	1.9047189320991524	3.619044777927465	1.0	False	0.11888208921526065	0.0	0.0
cor	2	2	166	0 days 00:36:29.138809715	0 days 00:36:29.186143045	0.04733333	True	10.0	23.0	0.4166666666666666	1.0	45.45454545454545	280.22032013655445	116.89900374913871	80.83321701473183	80.83321701473183	1.2361217318036477	11.201556785815546	3.709000859476364	0.0	7.041249852046678	-3.1634598322536633e-13	84.54221787420823	84.54221787420823	1.7053025658242404e-13	0.0	['Hover']	22.183465254559575	0.0712215320910973	2.293539237197023	3.4916696965845913	1.0	False	0.12400896563763925	0.0	0.0
cor	2	2	167	0 days 00:37:00.900807357	0 days 00:37:01.102140675	0.201333318	True	11.0	176.0	0.4545454545454545	1.0	80.0	307.78730276903684	184.39482372513226	186.54874531192246	201.54874531192246	1.069560059069835	-11.804415002007431	94.39103691616008	701.9027838578512	642.6489885813381	-642.5749116654255	92.15770839576244	100.55770839576242	146.3133439908129	128.51498233308484	['Hover-Continuous-Mix', 'Unclassified', 'Fragmented-Continuous-Mix', 'Unclassified', 'Fragmented-Continuous-Mix', 'Unclassified', 'Hover-Continuous-Mix', 'Continuous', 'Hover-Continuous-Mix', 'Unclassified']	100.67939911054826	0.3232380952380952	4.148928468102723	8.179553768872761	3.0	True	0.8867362332235971	0.05	0.25	143.7859037206859	411.11239699088134	414.34319347453385	-415.2951053469863	42.77539585073971	[42.77539585]	23.731148876970693	0.134	0.182	9.0	46.0	0.5681818181818181	83.63636363636364
cor	2	2	168	0 days 00:37:07.532806864	0 days 00:37:07.604140193	0.071333329	True	10.0	42.0	0.5	1.0	54.54545454545454	309.0338391830693	118.60480329761913	120.75024492439431	135.75024492439434	1.3614654224358356	-8.905138631497369	59.79406226554558	2374.8418261225866	39.41614748448776	-39.32999568285117	122.57900543854484	211.41797308889096	123.03688874831036	2.7530996977993567	['Hover-Continuous-Mix', 'Unclassified']	173.66115731754638	0.5575510204081633	2.6859929529106408	5.277513442481791	2.0	False	0.673363047801343	0.0	0.0
cor	2	2	169	0 days 00:37:08.828140102	0 days 00:37:08.975473424	0.14733332200000002	True	10.0	114.0	0.40625	1.0	70.02457002457002	309.3966472711816	119.7328880056842	121.87506078077999	136.87506078077996	0.9703374472469596	-2.1334980426745678	63.750299884554344	1381.254934960841	-43.0758500394096	69.13532111836247	123.93852957221344	223.75355998139472	124.770031820778	11.608577374416768	['Continuous', 'Hover-Continuous-Mix', 'Unclassified', 'Fragmented-Continuous-Mix', 'Unclassified', 'Hover-Continuous-Mix', 'Unclassified']	100.1358275247852	0.3214929214929215	1.7452470133750373	3.8805899473013477	2.0	True	0.9352791620056004	0.057999999999999996	0.3918918918918919	26.849218862850986	601.9935114386744	602.9534265533292	-347.3512119378824	97.64994488511357	[146.59889553]	30.785974116891197	0.0	0.055999999999999994	10.0	42.0	0.42857142857142855	65.8307210031348
cor	2	2	170	0 days 00:37:12.994806459	0 days 00:37:13.089473119	0.09466666	False	10.0	65.0	0.3939393939393939	1.0	62.862669245647965	308.9691529805839	118.51872782721532	120.66474772431307	135.66474772431306	1.6641134793039918	-6.528461279735155	23.38315757117243	606.792497866958	350.1569153563279	-386.8248944690248	111.60156518074541	184.206433560448	48.176942776807955	36.36154008008842	['Unclassified']	227.15001278781276	0.7292806484295845	2.0799919086811496	6.348999449404245	1.0	False	0.3750765976526728	0.0	0.0
cor	2	2	171	0 days 00:37:13.594139748	0 days 00:37:13.678806408	0.08466666	True	9.0	27.0	0.08333333333333333	0.0	28.541226215644823	307.49781509533545	120.03833091463385	122.19736669143057	137.19736669143057	1.6475846616568282	-10.970135320164829	1.5910724910990617	0.0	-3.603779320231891	-2.4984665499285377e-13	123.78843918252967	138.7884391825297	1.1368683772161605e-13	0.0	['Hover']	15.659798822884744	0.050276854928017714	1.652922861462329	3.3320369494942383	2.0	False	0.16079603189099714	0.0	0.0
cor	2	2	172	0 days 00:37:24.833472247	0 days 00:37:24.882138910	0.048666663000000006	True	8.0	28.0	0.3333333333333333	1.0	53.03030303030303	276.91718341459926	196.99498676080282	0.6697041840655024	0.6697041840655024	0.7008952935809528	-7.058052749588401	0.8134926207451674	0.0	-2.069143501218699	-2.368475785867001e-15	1.48319680481067	1.4831968048106698	1.3322676295501877e-15	0.0	['Hover-Continuous-Mix', 'Unclassified']	81.20502506338416	0.2607142857142857	1.4012101296558044	2.006134753161242	0.0	False	0.4150284511691962	0.0	0.0
cor	2	2	173	0 days 00:37:24.920805574	0 days 00:37:25.008805567	0.08799999300000001	True	9.0	89.0	0.5555555555555556	2.0	91.94214876033058	276.8149592837441	196.74891864942842	0.9117660029624424	0.9117660029624424	0.6069938208204623	-6.107372569420773	141.28419917450753	3417.8062054949187	-1973.222953389544	-1970.6502926564413	142.19596517747	277.12307157765497	231.12538172056014	94.88069523398458	['Unclassified', 'Hover-Continuous-Mix', 'Unclassified']	112.65553912902857	0.3616883116883117	2.9610885550482284	7.299141858473617	2.0	False	0.5833623920574567	0.0	0.0
cor	2	2	174	0 days 00:37:26.078805488	0 days 00:37:26.132805484	0.053999995999999995	True	8.0	22.0	0.5	0.0	37.03703703703704	276.25192789939723	196.9797172184369	0.660017039098295	0.660017039098295	0.5912498718142293	-0.9049892653004586	0.8231797657123751	0.0	-1.0048832738797708	2.0066253185817643e-15	1.4831968048106698	1.4831968048106694	1.5543122344752194e-15	2.220446049250313e-16	['Hover']	5.932787219242678	0.01904761904761905	1.9768071976675767	3.644870160851717	1.0	False	0.05476806667094082	0.0	0.0
cor	2	2	175	0 days 00:37:27.893472020	0 days 00:37:27.996138679	0.102666659	True	9.0	58.0	0.4	1.0	51.69340463458111	276.34291410118334	196.29182696919952	1.3508353168472074	1.3508353168472074	0.2573229545586864	-0.3494893215815329	0.13236148796346245	0.0	-1.5076661933711286	-1.1145768404080022e-15	1.48319680481067	1.48319680481067	6.2172489379008774e-15	0.0	['Hover']	2.96639360962134	0.009523809523809526	1.5712209024294854	3.554059483530879	1.0	False	0.02621454994103827	0.0	0.0
cor	2	2	176	0 days 00:37:28.642805297	0 days 00:37:28.687471961	0.044666664	True	3.0	13.0	0.6000000000000001	0.0	26.85950413223141	275.9060647230183	197.07057788571083	0.5562509951796643	0.5562509951796643	0.7877161880325659	-0.4662154121166284	18.185963174700614	2494.467353545217	-605.6762304317782	-606.7623292407329	18.742214169880285	18.742214169880285	192.8155846253869	26.69754248659206	['Fragmented-Continuous-Mix', 'Unclassified']	268.5934577438958	0.8623376623376623	1.7546988347221115	2.8241039728531265	2.0	False	0.5294477913546258	0.0	0.0
cor	2	2	177	0 days 00:37:30.461471829	0 days 00:37:30.578138487	0.116666658	True	8.0	45.0	0.25	0.0	35.26645768025078	277.02	197.21999999999997	0.44870464531289056	0.44870464531289056	0.02079567116484896	-0.2362118906385347	1.0344921594977792	0.0	-9.80058945876e-16	-9.80058945876e-16	1.48319680481067	1.4831968048106698	0.0	0.0	['Hover']	6.341944958500795	0.02036124794745484	1.3840964564638811	2.7967029917832456	1.0	False	0.08059280978286879	0.0	0.0
cor	2	2	178	0 days 00:37:31.892138389	0 days 00:37:32.016805047	0.124666658	True	10.0	82.0	0.4545454545454545	1.0	59.16305916305916	276.29868742972286	197.20219242079858	0.43945170812191503	0.43945170812191503	0.051980658620751866	0.033858101495806835	55.75722722970456	294.28508031957733	-294.27596723500744	-294.2850803195768	56.19667893782646	56.19667893782647	35.596723315456146	35.59672331545607	['Unclassified', 'Fragmented-Continuous-Mix', 'Continuous']	124.9181308940542	0.40105820105820095	2.211427560964197	5.580269893980179	2.0	True	0.9290718035745446	0.066	0.5238095238095238	45.54011111655172	419.2830288880877	-426.9769239658936	-426.9808983545858	45.97910094913075	[45.97910095]	26.69754248659212	0.06	0.124	8.0	58.0	0.625	79.88980716253444
cor	2	2	179	0 days 00:37:33.669471591	0 days 00:37:33.720138254	0.050666663	True	8.0	26.0	0.25	1.0	47.27272727272727	277.02000000211603	197.22000000056	0.4487046448325993	0.4487046448325993	0.20905797652810826	0.18637983817828327	1.0344921599780703	0.0	1.573542576238651e-08	-2.273736754432321e-15	1.48319680481067	1.4831968048106696	2.2204460492503127e-15	0.0	['Hover']	2.9663936096213392	0.009523809523809523	1.9573866583301032	4.488565516060215	1.0	False	0.03136738597656339	0.0	0.0
cor	2	2	180	0 days 00:37:36.771471361	0 days 00:37:36.846138022	0.07466666100000001	True	9.0	41.0	0.29166666666666663	1.0	50.368550368550366	276.22300337491174	196.93524981961608	0.7033685432462852	0.7033685432462852	0.27189324724448993	0.10040260942476983	0.7798282615643847	0.0	-0.1776410356096451	-1.5363086178596762e-15	1.4831968048106696	1.4831968048106696	3.1086244689504387e-15	0.0	['Hover-Continuous-Mix', 'Unclassified']	53.87612177474432	0.17297297297297295	1.7673523691005537	3.193371187215199	1.0	False	0.3971591135686183	0.0	0.0
cor	2	2	181	0 days 00:37:37.423471312	0 days 00:37:37.577471301	0.153999989	True	9.0	85.0	0.3333333333333333	1.0	50.177095631641095	277.0381353906442	197.04196585013446	0.6272936285060797	0.6272936285060797	0.6970524879332637	0.08193135655232421	122.28439422081922	661.1978711697527	494.46104789226683	496.5536137998809	122.91168784932529	139.50993390236312	238.78858879034226	76.46925652518178	['Unclassified', 'Fragmented-Continuous-Mix', 'Unclassified', 'Hover-Continuous-Mix']	185.65001045149654	0.5960420531849104	1.5622275841599695	3.95603915266628	2.0	False	0.6040134747885828	0.0	0.0
cor	2	2	182	0 days 00:37:37.586804633	0 days 00:37:37.629471297	0.04266666400000001	True	7.0	31.0	0.5	1.0	67.09956709956711	276.9772990258581	196.7847618626689	0.8820354622360592	0.8820354622360592	0.6474564018550596	0.08115991315623049	179.4613436746542	71.22788407350231	68.63754019650489	71.22788407350163	180.3433791368903	195.3433791368903	2.9915711310870847	2.9915711310870847	['Hover-Continuous-Mix']	31.076504481747364	0.09977324263038548	3.427135176360348	5.857176025894168	1.0	False	0.6087172143333865	0.0	0.0
cor	2	2	183	0 days 00:37:38.588804559	0 days 00:37:38.648804555	0.059999996000000014	True	7.0	25.0	0.4666666666666667	1.0	37.87878787878788	277.024000376221	197.24878638116542	0.4200885171426765	0.4200885171426765	0.7592518339860028	0.2465007387294827	1.0631082876679934	0.0	0.4631330154261747	-8.881784197001588e-17	1.4831968048106694	1.4831968048106694	3.1086244689504387e-15	0.0	['Hover-Continuous-Mix']	24.91770632081925	0.08000000000000003	1.2480619875406636	2.8685796145308937	1.0	False	0.4919986390431341	0.0	0.0
cor	2	2	184	0 days 00:37:44.210804142	0 days 00:37:44.264137471	0.053333329000000006	True	5.0	10.0	0.5	0.0	17.482517482517483	275.6533504835497	192.0317538112013	5.582054868980746	5.582054868980746	3.3034494662574305	7.1036418017607055	4.800322764693943	0.0	-7.737769024144787	-3.4980565452804934e-14	10.38237763367469	10.38237763367469	0.0	0.0	['Hover-Continuous-Mix']	17.798361657728034	0.05714285714285715	2.188052673056241	3.5486112487039003	1.0	False	0.3950110043910587	0.0	0.0
cor	2	2	185	0 days 00:37:52.382136868	0 days 00:37:52.464136862	0.081999994	True	9.0	47.0	0.4	1.0	52.106430155210646	289.16764509409387	120.65812560348736	95.08355804589159	110.08355804589159	3.268216816581273	10.170120493783386	21.990245708915534	414.25954576912034	236.58601931813442	234.14669978254682	98.95751702100193	237.02246310491213	35.44620809015794	17.72310404507894	['Unclassified', 'Hover-Continuous-Mix', 'Unclassified']	116.70226566632245	0.3746806039488966	1.5191472480797985	3.183141352084892	2.0	False	0.6655179761421246	0.0	0.0
cor	2	2	186	0 days 00:37:53.182803476	0 days 00:37:53.238136805	0.055333329	True	5.0	19.0	0.3636363636363637	1.0	31.986531986531983	291.8060721395738	130.50689864300296	67.66933862433207	67.66933862433207	2.5321339426423286	5.963594373332469	2.040911201769387	0.0	16.936829163278247	0.0	69.71024982610146	69.71024982610146	1.1368683772161605e-13	0.0	['Unclassified', 'Hover-Continuous-Mix']	78.11503172002864	0.25079365079365074	1.9733467647794316	2.9941245374138976	2.0	False	0.3991188857231269	0.0	0.0
cor	2	2	187	0 days 00:37:54.193470067	0 days 00:37:54.227470065	0.033999998000000003	True	3.0	5.0	1.0	0.0	13.368983957219253	288.20782279401226	117.86456257019991	93.90033049103208	108.90033049103208	0.8678765938454879	6.608756616217993	78.80662183031174	174.49374174243175	-173.6803520531449	174.4937417424319	15.093708660720349	15.093708660720345	5.932787219242679	5.932787219242679	['Hover-Continuous-Mix']	83.5825022946248	0.2683473389355743	1.6978849614082887	2.667908644309914	1.0	False	0.7348642703417072	0.0	0.0
cor	2	2	188	0 days 00:37:57.350803166	0 days 00:37:57.451469825	0.100666659	True	10.0	46.0	0.3333333333333333	1.0	41.81818181818182	290.0881423258635	113.28336979540217	95.40290580942565	110.40290580942565	2.4962452310998122	-1.2974119902285963	18.96001237351414	294.38131253607907	283.18137202479403	266.8503155595564	95.93830788580964	219.2354604396506	26.685031555955614	26.685031555955614	['Unclassified', 'Hover-Continuous-Mix', 'Continuous']	129.27543350729792	0.4150476190476191	1.725055772072635	4.126521774684926	2.0	True	0.8742777622302644	0.048	0.48	26.557071867495843	434.0515251170248	417.01089451802267	430.7698899845579	103.50236450139649	[241.56731059]	20.676954719258763	0.052000000000000005	0.098	9.0	34.0	0.5	64.39393939393939
cor	2	2	189	0 days 00:37:58.865469720	0 days 00:37:58.946136381	0.080666661	True	6.0	18.0	0.0	0.0	20.454545454545453	279.416184011952	119.46939363442816	78.23448117196895	78.23448117196895	3.0391900510756784	3.2438669888325222	85.1432697038576	1536.054067142893	-1322.7817898904682	-1536.0540671428867	158.8013857203891	169.6763857203891	122.88432537143116	122.88432537143116	['Unclassified', 'Hover-Continuous-Mix', 'Unclassified']	128.29652361612293	0.4119047619047619	2.290090838661282	4.587104125629027	2.0	False	0.4373993413771454	0.0	0.0
cor	2	2	190	0 days 00:38:09.235468950	0 days 00:38:09.271468948	0.035999998000000005	True	9.0	36.0	0.6	2.0	90.9090909090909	250.85240002249543	194.94	200.40658382907026	338.4715299129805	0.5268612292484521	5.657366261729635	35.261462165019324	205.90199436497892	205.9215667220866	-205.9019943649781	165.14512166405095	303.2100677479612	5.929977437711357	5.929977437711357	['Continuous', 'Hover-Continuous-Mix', 'Unclassified']	67.7326540863539	0.21746031746031744	3.4406827237128503	7.019890731425367	1.0	True	0.8421178370414307	0.018000000000000002	0.5	34.6023997911952	411.8039887299579	411.82573300813203	-411.8039887299563	165.80400804601888	[303.86895413]	5.929977437711357	0.0	0.016	8.0	25.0	0.625	126.26262626262628
cor	2	2	191	0 days 00:38:09.294135613	0 days 00:38:09.324802277	0.030666664000000007	False	9.0	18.0	0.5	1.0	51.13636363636364	250.81079663839088	194.93999999999997	200.40747571204295	338.47242179595315	0.4946449045493579	5.258080502145823	188.9788050881044	186.97319569294362	93.49966949502267	93.48659784646952	160.6221587340394	175.62215873403937	8.974713393261167	2.9915711310870563	['Unclassified']	221.5525227185937	0.7113095238095237	2.306178634575	3.6073168922365113	1.0	False	0.5195766775037441	0.0	0.0
cor	2	2	192	0 days 00:38:12.289468724	0 days 00:38:12.540135372	0.250666648	True	11.0	198.0	0.3333333333333333	1.0	72.0	251.3368502837804	194.99755164416675	200.45373672312493	338.5186828070352	1.2454359325686193	-0.31577220757810665	74.23616728715201	1035.156980705106	1.059727702206787	-1.6007106751203535e-12	131.17314889202663	238.71798834712703	231.6820262406896	0.0	['Unclassified', 'Hover-Continuous-Mix', 'Continuous', 'Fragmented-Continuous-Mix', 'Unclassified']	112.0584849970557	0.3597714285714285	2.9022299202489688	9.295200013775748	4.0	True	0.9719798433493106	0.134	0.536	75.77711377642879	559.5393609775485	561.254932174436	-478.05712724550995	125.0222629649618	[257.57683833]	65.43620489979801	0.044000000000000004	0.17600000000000002	11.0	146.0	0.3351648351648352	99.05020352781546
cor	2	2	193	0 days 00:38:14.022801928	0 days 00:38:14.083468591	0.060666662999999996	True	8.0	20.0	0.0	0.0	30.303030303030305	251.53241031711076	194.97890693206642	200.43090392863587	338.4958500125462	1.000210652629481	-1.848939349814316	0.3648040202845506	0.0	-1.4452961904335098	-2.425319204727809e-13	200.06609990835128	338.13104599226176	0.0	0.0	['Hover']	7.317104237065967	0.0234920634920635	1.3557319961587853	3.2329164880924406	1.0	False	0.08384728837555128	0.0	0.0
cor	2	2	194	0 days 00:38:27.546134258	0 days 00:38:27.618134252	0.071999994	True	9.0	38.0	0.45	1.0	47.97979797979797	247.42318364672272	105.89479770819264	115.56392142078684	253.628867504697	2.692823839127347	-10.980664821332198	6.918307010840527	82.36079774599158	2.1474180458527472e-13	0.0	122.4822284316273	260.5471745155376	5.929977437711386	0.0	['Hover-Continuous-Mix']	41.19991124474083	0.13227513227513232	1.5006792509084073	4.525242336249616	1.0	False	0.6460514758568423	0.0	0.0
cor	2	2	195	0 days 00:38:31.600133957	0 days 00:38:31.669467285	0.069333328	True	6.0	31.0	0.29166666666666663	1.0	40.259740259740255	285.95291606670014	116.68501109388448	91.55718657739368	106.55718657739368	1.5029424513835778	-8.194947373149422	16.227935918523983	436.0366872725813	1.7349689629470804	-5.19711258155959e-13	107.78512249591768	122.78512249591768	33.27566780688042	0.0	['Unclassified', 'Hover-Continuous-Mix']	101.36590734591778	0.3254421768707483	1.6379965806500776	2.781256994005112	1.0	False	0.6463109476811975	0.0	0.0
cor	2	2	196	0 days 00:38:31.781467277	0 days 00:38:31.816133941	0.034666664	True	7.0	23.0	0.5	1.0	61.49732620320856	285.4047552131064	117.53180703472992	80.39526626541591	80.39526626541591	3.108629586485873	-7.086170918552924	20.772196751499493	0.0	5.295799697360959	4.1796631515300014e-13	101.16746301691539	116.16746301691542	7.105427357601003e-14	1.4210854715202004e-14	['Hover-Continuous-Mix']	23.20766765174342	0.07450980392156863	3.119063545736252	4.7901512148317416	1.0	False	0.4800297735016916	0.0	0.0
cor	2	2	197	0 days 00:38:35.195467023	0 days 00:38:35.237467020	0.041999997	True	7.0	18.0	0.3333333333333333	1.0	38.96103896103896	280.44512926660536	102.50642666901727	86.89720861116183	224.9621546950721	0.4378778391524229	-0.9144883629009622	0.6051314050939522	0.0	7.895322599422407	0.0	87.5023400162558	225.5672861001661	2.8421709430404014e-14	0.0	['Hover-Continuous-Mix', 'Unclassified']	39.55191479495119	0.12698412698412698	1.8106242651772704	3.5897542431282337	1.0	False	0.3035885863871768	0.0	0.0
cor	2	2	198	0 days 00:38:37.861466825	0 days 00:38:37.942800153	0.08133332800000001	True	8.0	41.0	0.325	1.0	45.45454545454545	280.4399999999965	102.60000005414128	86.89714287768395	224.9620889615942	0.1562649992106118	0.3621152141100308	36.623718585470826	251.01574106924485	217.44135438573784	217.44135451071537	121.77740506576491	136.7774050657649	23.336390465477397	17.830191069878648	['Unclassified', 'Hover-Continuous-Mix', 'Continuous', 'Hover-Continuous-Mix']	67.6482445120964	0.21718931475029032	1.9541596259313492	3.7631567401108734	2.0	True	0.8029873010323485	0.018000000000000002	0.2195121951219512	42.623514208350834	312.9796661035628	332.3967924230318	332.39679234301116	127.77720069064577	[142.77720069]	5.9831422621741694	0.06	0.076	3.0	4.0	0.0	20.202020202020204
cor	2	2	199	0 days 00:38:38.696133430	0 days 00:38:38.792800090	0.09666666	True	10.0	92.0	0.55	2.0	85.34322820037106	280.4588225434075	102.6188225434075	86.87730587724718	224.94225196115747	0.8593981903554275	0.4120068426896277	48.3444582747169	605.3864509431305	-604.7057533458545	605.3864509431303	38.53284760253025	38.53284760253025	59.327872192426774	59.327872192426774	['Continuous', 'Fragmented-Continuous-Mix']	55.75609213186232	0.17900874635568514	3.5060480087221544	6.46799082654192	1.0	True	0.9843429408672896	0.08800000000000001	0.8979591836734694	52.08561668730883	623.2451711801798	-622.9815480715962	623.6168383863038	34.78770687646843	[34.78770688]	53.3950849731841	0.0	0.086	10.0	86.0	0.5227272727272727	88.84297520661156
cor	2	2	200	0 days 00:38:38.934800079	0 days 00:38:39.035466738	0.100666659	False	8.0	41.0	0.25396825396825395	1.0	37.27272727272727	280.052110518291	102.2121105182909	87.30593805858534	225.3708841424956	1.014889553575737	0.3723998723238253	14.208959814075065	1907.0316712123895	1440.1516910237685	1480.3012180556927	99.01154842762398	116.47284734930216	104.19294726597832	98.68674787037962	['Unclassified']	234.34509516008575	0.7523809523809524	2.530756393258684	8.036678147262831	2.0	False	0.36575535581652296	0.0	0.0
cor	2	2	201	0 days 00:38:39.767466684	0 days 00:38:39.892800008	0.125333324	True	10.0	89.0	0.2708333333333333	1.0	64.21356421356421	279.8801628981118	102.04016289811176	87.4871529697801	225.55209905369037	2.13705842463029	0.07618893098620698	19.48776371908843	668.9216249375701	317.16890898216735	341.17166091500263	105.90794519579501	193.18418337205966	76.024825648883	42.98762927529037	['Unclassified', 'Fragmented-Continuous-Mix', 'Unclassified', 'Hover-Continuous-Mix', 'Unclassified', 'Hover-Continuous-Mix', 'Unclassified']	146.0124854513614	0.4687830687830688	2.4322587970589646	5.177813728315084	3.0	False	0.6800411496153316	0.0	0.0
cor	2	4	1	0 days 01:02:12.290900000	0 days 01:02:12.520900000	0.23	True	10.0	80.0	0.25	0.0	31.34796238244514	283.22724422046065	195.9420776380835	0.0	0.0	3.4756934213606234		90.92262107945196	0.0	-3.1361886268032014e-14	-3.1361886268032014e-14	90.92262107945196	105.922621079452	0.0	0.0	['Hover']	8.966898146538398	0.02970297029702972	1.548480302365261	4.122895175026201	4.0	False	0.03851615756371673	0.0	0.0
cor	2	4	2	0 days 01:02:12.594233333	0 days 01:02:12.626233333	0.032	True	7.0	13.0	0.0	1.0	36.93181818181819	281.2267608037816	195.91208688932548	0.0	0.0	3.835004005602464		90.92262107945196	0.0	-2.273736754432321e-13	-2.273736754432321e-13	90.92262107945196	105.922621079452	0.0	0.0	['Hover']	8.966898146538398	0.0297029702970297	2.9162163997667814	5.340593048703403	1.0	False	0.03116101615577993	0.0	0.0
cor	2	4	3	0 days 01:02:12.646900000	0 days 01:02:12.732900000	0.08600000000000001	True	9.0	42.0	0.4166666666666666	1.0	43.388429752066116	280.4980166323492	195.86077176584232	0.0	0.0	3.91325469733288		90.92262107945196	0.0	-8.268133652481166e-14	-8.268133652481166e-14	90.92262107945196	105.922621079452	0.0	0.0	['Hover']	13.722071406066336	0.04545454545454546	1.7937478440944503	3.6827859085880585	2.0	False	0.04689673866671377	0.0	0.0
cor	2	4	4	0 days 01:02:12.757566666	0 days 01:02:12.833566666	0.076	True	7.0	24.0	0.0	0.0	28.708133971291872	279.7671273891142	195.73094896680072	0.0	0.0	3.9101132212490217		90.92262107945194	0.0	-9.573628439715035e-14	-9.573628439715035e-14	90.92262107945194	105.92262107945196	0.0	0.0	['Hover']	42.47478069412926	0.14069828035435125	1.6131989543104197	3.7839158177788415	2.0	False	0.1000654441998524	0.0	0.0
cor	2	4	5	0 days 01:02:12.867566666	0 days 01:02:12.927566666	0.06000000000000001	True	8.0	29.0	0.25	1.0	43.93939393939394	279.32499762792054	195.42698699764148	0.0	0.0	3.77923213524987		90.92262107945194	0.0	-1.2126596023639046e-13	-1.2126596023639046e-13	90.92262107945194	105.92262107945196	0.0	0.0	['Hover']	14.944830244230655	0.04950495049504952	1.9794403652331465	3.0386100280272967	1.0	False	0.11158827158216007	0.0	0.0
cor	2	4	6	0 days 01:02:12.986233333	0 days 01:02:13.040233333	0.054000000000000006	True	6.0	16.0	0.0	0.0	26.93602693602693	278.9755316551346	195.0936104381739	0.0	0.0	3.4885340188831213		90.92262107945196	0.0	-1.3473995581821156e-13	-1.3473995581821156e-13	90.92262107945196	105.92262107945196	0.0	0.0	['Hover']	16.826771830541187	0.055738907224055737	1.8309173001898955	3.0515032015746177	1.0	False	0.17146578277137958	0.0	0.0
cor	2	4	7	0 days 01:02:13.046233333	0 days 01:02:13.176233333	0.13	True	8.0	47.0	0.0	1.0	32.86713286713287	278.72458510317557	195.08782026753934	0.0	0.0	3.1454107038163124		90.92262107945196	0.0	-5.596890472448789e-14	-5.596890472448789e-14	90.92262107945196	105.922621079452	0.0	0.0	['Hover']	15.496639360940714	0.051332825590251326	2.2831173981062864	4.431118787695958	4.0	False	0.18245364971206465	0.0	0.0
cor	2	4	8	0 days 01:02:13.555566666	0 days 01:02:13.594900000	0.039333334000000005	True	8.0	19.0	0.75	1.0	43.18181818181818	278.00295964428915	196.54482921899356	0.0	0.0	1.7413356460142695		82.0076760429763	73.6862039093092	-5.456968210637568e-13	-5.456968210637568e-13	82.0076760429763	211.35661497583428	5.894896312744804	0.0	['Hover-Continuous-Mix']	33.77531635196129	0.1118811881188119	2.488788274920726	5.826662111784724	1.0	False	0.7512275318182822	0.0	0.0
cor	2	4	9	0 days 01:02:14.180900000	0 days 01:02:14.230900000	0.05	True	6.0	25.0	0.0	1.0	43.70629370629371	278.2095803484713	197.41617699115884	0.0	0.0	0.5002207051015057		90.91136285972726	4806.506850653878	-2579.664151203317	-2579.664151203317	90.91136285972726	199.10888426285118	305.46243915216115	91.37749690263814	['Unclassified', 'Hover-Continuous-Mix']	135.1932335939635	0.4478293983244477	2.0949327634551103	5.505703899706772	1.0	False	0.48111462937116	0.0	0.0
cor	2	4	10	0 days 01:02:14.946233333	0 days 01:02:15.014900000	0.068666667	True	7.0	24.0	0.0	1.0	31.168831168831172	278.1025321385733	196.27929869918614	0.0	0.0	0.2480295971869532		85.14163284266351	291.77925188911087	-1.0394225163119181e-13	-1.0394225163119181e-13	85.14163284266351	213.51802336249256	23.330477896136195	0.0	['Hover-Continuous-Mix', 'Unclassified']	66.09884919448302	0.2189533239038189	1.9338309947030268	5.341156986746935	1.0	False	0.7135365123049702	0.0	0.0
cor	2	4	11	0 days 01:02:18.424233333	0 days 01:02:18.476233333	0.052000000000000005	True	8.0	39.0	0.5	1.5	68.18181818181817	278.1762650220851	197.21963060116548	0.0	0.0	0.3404583530578525	0.0	19.888120248091575	431.10087242973054	143.70029080991088	143.70029080991088	19.888120248091575	19.888120248091568	26.90069443961518	8.966898146538398	['Continuous', 'Hover-Continuous-Mix', 'Unclassified']	98.98076030986614	0.32787509520182795	2.0521981146466723	5.088557872015644	1.0	True	0.8730251521572806	0.026000000000000002	0.5	15.749551872766153	478.1409074515458	459.840930591713	459.840930591713	15.749551872766153	[15.74955187]	11.955864195384526	0.0	0.024	7.0	27.0	0.75	94.4055944055944
cor	2	4	12	0 days 01:02:18.479566666	0 days 01:02:18.582900000	0.103333334	True	11.0	129.0	0.8333333333333334	2.0	112.76223776223776	278.0666813835454	197.21963483680443	0.0	0.0	0.3728284418064191	0.0	118.65768404127282	1401.0078033571015	-1285.8142383856248	-1285.8142383856248	118.65768404127282	236.4856648505566	151.69487692765534	133.72468079210506	['Unclassified', 'Hover-Continuous-Mix', 'Unclassified']	103.57916961578323	0.3431073876618432	4.322350416953748	11.77460149739526	1.0	False	0.5795776490446669	0.0	0.0
cor	2	4	13	0 days 01:02:19.311566666	0 days 01:02:19.481566666	0.17	True	11.0	253.0	0.6076555023923444	3.0	135.29411764705878	278.15491435537564	197.2194108737194	0.0	0.0	0.1353036555458062	0.0	71.117837072648	1226.476825299637	-385.95259088798036	-385.95259088798036	71.117837072648	154.41374821207364	169.7898142895967	20.922762341922926	['Continuous', 'Fragmented-Continuous-Mix', 'Unclassified', 'Hover-Continuous-Mix', 'Unclassified']	60.4474427996059	0.2002329644729179	7.305781223774048	14.74214434084339	1.0	True	0.9686986063373618	0.057999999999999996	0.3411764705882353	37.56821120015225	741.6862581470723	618.4067687267859	618.4067687267859	37.56821120015225	[37.5682112]	32.87862653730745	0.0	0.055999999999999994	10.0	100.0	0.7272727272727273	156.73981191222572
cor	2	4	14	0 days 01:02:21.788900000	0 days 01:02:21.926233333	0.137333333	True	9.0	85.0	0.5576923076923077	1.0	55.99472990777338	277.2902096340676	197.0835920648539	0.0	0.0	0.3042925818316487	0.0	53.094170036028004	3250.982439435709	32.4887614005035	32.4887614005035	53.094170036028004	54.83330047081061	564.7650172605815	20.922762341922926	['Unclassified', 'Hover-Continuous-Mix', 'Unclassified', 'Fragmented-Continuous-Mix', 'Unclassified', 'Hover-Continuous-Mix']	175.3526748656397	0.5808580858085809	3.0622939675611662	8.61813492123829	2.0	False	0.5998929378533479	0.0	0.0
cor	2	4	15	0 days 01:02:24.659566666	0 days 01:02:24.814233333	0.15466666699999998	True	10.0	96.0	0.3684210526315789	1.0	56.67060212514758	277.11168809705606	197.35453831454015	0.0	0.0	0.1827344984023861	0.0	22.261974402769575	310.54192715284495	310.5419271528452	310.5419271528452	22.261974402769575	22.26197440276957	47.823456781538106	47.823456781538106	['Hover-Continuous-Mix', 'Continuous']	21.427392973546294	0.070978526424071	4.4126869305813745	14.663766603821358	2.0	True	0.9813100372218786	0.134	0.8701298701298701	25.361599981627254	356.887886280944	356.89146851894134	356.89146851894134	25.361599981627254	[25.36159998]	47.82345678153811	0.02	0.152	10.0	93.0	0.3684210526315789	63.093622795115344
cor	2	4	16	0 days 01:02:24.825566666	0 days 01:02:24.970233333	0.144666667	True	11.0	152.0	0.5	2.0	95.95959595959594	277.02669790575857	197.22540398504032	0.0	0.0	0.2088597812665432	0.0	90.43247883237213	1483.0898397224448	-394.3774647783087	-394.3774647783087	90.43247883237213	177.4215313310779	222.28272771172797	56.79035492807653	['Continuous', 'Hover-Continuous-Mix', 'Unclassified']	93.69578294785721	0.3103685368536854	4.718951185186818	13.753989189458474	1.0	True	0.978891479673457	0.084	0.5833333333333334	79.27776228818065	545.9601875217095	491.7356200200814	491.7356200200814	79.27776228818065	[147.3561512]	47.11765260948407	0.0	0.08199999999999999	10.0	91.0	0.5	98.48484848484848
cor	2	4	17	0 days 01:02:27.141566666	0 days 01:02:27.194900000	0.053333334	True	6.0	17.0	0.0	0.0	28.619528619528623	277.0200000000001	197.22000000000008	0.0	0.0	1.1523130510968989e-05	0.0	1.4944830244230662	0.0	-2.1053118096595556e-15	-2.1053118096595556e-15	1.4944830244230662	1.4944830244230662	0.0	0.0	['Hover']	2.9889660488461325	0.0099009900990099	2.106848717745041	3.1350344292435253	1.0	False	0.025025986482832798	0.0	0.0
cor	2	4	18	0 days 01:02:28.396233333	0 days 01:02:28.541566666	0.145333333	True	10.0	145.0	0.5210084033613445	2.0	90.28642590286422	277.02257774661047	197.21999999248226	0.0	0.0	0.21187797166115369	0.0	69.91462218546735	2129.1025773119172	51.180925493940705	51.180925493940705	69.91462218546735	82.48056130393479	505.23046706025434	0.0	['Unclassified', 'Hover-Continuous-Mix', 'Unclassified', 'Hover-Continuous-Mix', 'Unclassified', 'Fragmented-Continuous-Mix', 'Fragmented', 'Unclassified']	161.60889033966689	0.5353316153533161	3.08644706751343	8.419849889702137	1.0	False	0.6972021035531849	0.0	0.0
cor	2	4	19	0 days 01:02:30.618900000	0 days 01:02:30.668233333	0.049333333	True	10.0	37.0	0.325	1.0	67.27272727272728	276.8845424846106	197.36308467520303	0.0	0.0	0.10797713256718698	0.0	13.091671293946062	358.6759258615358	-239.11728390769028	-239.11728390769028	13.091671293946062	13.091671293946053	17.933796293076796	11.955864195384526	['Hover-Continuous-Mix']	26.661577155707487	0.08831683168316833	1.3554593893158149	2.8795192276932817	1.0	False	0.7993441593466173	0.0	0.0
cor	2	4	20	0 days 01:02:32.164900000	0 days 01:02:32.293566666	0.12866666599999999	True	11.0	119.0	0.5714285714285714	1.0	83.2167832167832	277.01970943305173	197.22	0.0	0.0	0.01978682659423221	0.0	80.25974734449164	1512.464363588705	1466.3869376001196	1466.3869376001196	80.25974734449164	149.38549608593806	202.6104326450491	190.63030188801534	['Hover-Continuous-Mix', 'Unclassified', 'Hover-Continuous-Mix', 'Unclassified']	107.69474594457908	0.35674028941355673	3.441618299031214	7.344248561525309	2.0	False	0.5426826340481363	0.0	0.0
cor	2	4	21	0 days 01:02:33.126900000	0 days 01:02:33.209566666	0.082666666	True	7.0	25.0	0.5	0.0	27.056277056277057	277.0199997707146	197.21999997510483	0.0	0.0	0.002776014749027402	0.0	1.4944830244230662	0.0	0.0	0.0	1.4944830244230662	1.4944830244230662	0.0	0.0	['Hover']	2.9889660488461325	0.0099009900990099	1.4186423689766696	4.812337435778127	1.0	False	0.02656432296652025	0.0	0.0
cor	2	4	22	0 days 01:02:36.156233333	0 days 01:02:36.214233333	0.057999999999999996	True	6.0	22.0	0.3333333333333333	1.0	34.48275862068965	277.03037222087784	196.94515835382896	0.0	0.0	0.5119357388717805	0.0	1.4944830244230665	0.0	0.0	0.0	1.4944830244230665	1.4944830244230665	0.0	0.0	['Hover']	6.699406661206847	0.022191874359849786	2.295073526792459	5.818303705334487	1.0	False	0.08716329763481334	0.0	0.0
cor	2	4	23	0 days 01:02:36.572233333	0 days 01:02:36.682900000	0.110666667	True	8.0	68.0	0.2	1.0	55.194805194805184	276.3525318763	196.53374837882	0.0	0.0	0.20602163032503404	0.0	10.888376320796624	160.12318118818558	106.74878745879066	106.74878745879066	10.888376320796624	10.888376320796624	17.933796293076796	11.955864195384526	['Hover-Continuous-Mix', 'Unclassified']	30.103158063378906	0.0997171145685997	2.27220974724055	5.592721300802221	2.0	False	0.74793987939409	0.0	0.0
cor	2	4	24	0 days 01:02:36.736900000	0 days 01:02:36.851566666	0.114666666	True	11.0	124.0	0.42857142857142855	2.0	97.17868338557993	276.2619870464177	196.93487415421413	0.0	0.0	0.3276825817562195	0.0	69.93149876352072	605.5232943783112	-605.5232943783111	-605.5232943783111	69.93149876352072	69.93149876352072	47.82345678153814	47.82345678153814	['Unclassified', 'Hover-Continuous-Mix', 'Unclassified']	57.04802441504601	0.18897234551041311	6.954389487041095	17.298446827603538	1.0	False	0.5726388502781534	0.0	0.0
cor	2	4	25	0 days 01:02:40.518900000	0 days 01:02:40.689566666	0.17066666600000002	True	11.0	189.0	0.4	2.0	99.89429175475685	277.02000000000004	196.07999999999703	0.0	0.0	0.02084073085482313	0.0	113.71844365815686	1120.4230337806102	515.2048314958963	515.2048314958963	113.71844365815686	128.54402505350572	420.7354914799291	88.61523101729368	['Hover-Continuous-Mix', 'Unclassified', 'Fragmented-Continuous-Mix', 'Fragmented', 'Fragmented-Continuous-Mix', 'Unclassified']	98.1145483243329	0.32500575638959245	4.166383763239939	16.46941741146596	3.0	False	0.6558177723394669	0.0	0.0
cor	2	4	26	0 days 01:02:40.850233333	0 days 01:02:40.953566666	0.103333333	True	11.0	147.0	0.6363636363636364	2.5	128.4965034965035	277.02000000000004	196.0800001009623	0.0	0.0	0.1346823311820326	0.0	114.2227317898709	1444.2053902214057	-1444.2053902214068	-1444.2053902214068	114.2227317898709	232.0507125991547	148.69984423839722	148.69984423839722	['Hover-Continuous-Mix', 'Continuous', 'Hover-Continuous-Mix', 'Unclassified', 'Fragmented-Continuous-Mix', 'Unclassified']	91.62330542039874	0.3035034272658036	7.27801098977105	15.581959282029052	1.0	True	0.8530102060944023	0.048	0.4615384615384616	134.47040564421349	357.26115977644065	-343.1808289775293	-343.1808289775293	134.47040564421349	[270.62718347]	17.970196135550626	0.008	0.054000000000000006	11.0	88.0	0.7388888888888889	166.66666666666666
cor	2	4	27	0 days 01:02:43.929566666	0 days 01:02:44.306233333	0.376666667	True	11.0	324.0	0.5151515151515151	1.0	78.33655705996131	276.9222853496658	196.44436127816132	0.0	0.0	0.09414762677035786	0.0	77.57275225678904	822.6265105977592	378.7873064927942	378.7873064927942	77.57275225678904	143.0733373853289	190.36135259512517	142.42402724129073	['Hover-Continuous-Mix', 'Continuous', 'Hover-Continuous-Mix', 'Unclassified', 'Hover-Continuous-Mix', 'Continuous', 'Hover-Continuous-Mix', 'Continuous', 'Hover-Continuous-Mix', 'Unclassified', 'Fragmented-Continuous-Mix', 'Continuous', 'Hover-Continuous-Mix', 'Unclassified', 'Fragmented-Continuous-Mix', 'Unclassified']	92.3876686693876	0.30603539077311986	3.9795385377641206	12.051005510347967	5.0	True	0.921291966046731	0.124	0.3297872340425532	82.31655307364701	512.0955782792583	468.61335473708283	468.61335473708283	82.31655307364701	[ 16.43931327 224.1236868 221.21775654 268.57413687]	68.52232692067992	0.018000000000000002	0.332	11.0	147.0	0.5882352941176471	107.77126099706743
cor	2	4	28	0 days 01:02:47.160233333	0 days 01:02:47.318900000	0.15866666699999998	True	11.0	113.0	0.2929292929292929	1.0	64.20454545454545	276.7157963553439	196.19163425335967	0.0	0.0	0.1732605743356751	0.0	32.20610917631708	784.60358782211	2.273736754432321e-13	2.273736754432321e-13	32.20610917631708	32.20610917631708	125.53657405153764	0.0	['Unclassified', 'Fragmented-Continuous-Mix', 'Continuous', 'Hover-Continuous-Mix', 'Unclassified']	90.8272058093118	0.30086633663366336	2.417073976617074	6.5503652861645385	3.0	True	0.9340343712206712	0.1	0.625	35.329578697361285	548.1658207694859	552.9587190365346	552.9587190365346	35.329578697361285	[35.3295787]	56.790354928076546	0.032	0.13	11.0	74.0	0.0	67.27272727272728
cor	2	4	29	0 days 01:02:48.191566666	0 days 01:02:48.248900000	0.057333334000000014	False	9.0	39.0	0.6666666666666666	1.0	61.128526645768034	277.0200000018873	196.07232110668187	0.0	0.0	0.4711324783984249	0.0	79.20462421434091	1843.9493091440381	-1743.2543558375799	-1743.2543558375799	79.20462421434091	90.58393455916844	106.9490599303543	101.10875263857916	['Unclassified']	232.21174165690812	0.7692045066575622	1.425739537985372	2.723727366714572	1.0	False	0.3346032107622424	0.0	0.0
cor	2	4	30	0 days 01:02:51.024900000	0 days 01:02:51.092233333	0.06733333300000001	True	6.0	17.0	0.0	0.0	22.72727272727273	277.02	196.08	0.0	0.0	0.001247171430367578	0.005523884738512739	1.4944830244230662	0.0	0.0	0.0	1.4944830244230662	1.4944830244230662	0.0	0.0	['Hover']	5.977932097692264	0.0198019801980198	1.7597545675688224	3.5257503326168145	1.0	False	0.12178760418793318	0.0	0.0
cor	2	4	31	0 days 01:03:13.706900000	0 days 01:03:13.817566666	0.110666666	True	8.0	46.0	0.26785714285714285	1.0	37.337662337662344	261.34254539039836	104.7115444027011	99.42820919691485	235.584987020976	0.6991920407494288	18.50701383392942	2.7435094266269853	0.0	-5.325957017832597	-1.2992781453898974e-13	96.68469977028788	232.84147759434902	0.0	0.0	['Hover-Continuous-Mix']	16.492687662383126	0.05463224893917963	1.3388903278932962	3.9223955806925552	1.0	False	0.2859342357658982	0.0	0.0
cor	2	4	32	0 days 01:03:26.438900000	0 days 01:03:26.488900000	0.05	True	5.0	5.0		0.0	8.741258741258742	249.66	197.22	193.62230125658888	329.77907908065015	0.3802446584331926	0.0	1.4975163441505484	0.0	-2.1862853408003088e-15	-2.798445236224395e-13	192.1247849124384	328.28156273649955	0.0	0.0	['Hover', 'Unclassified']	156.00103570323847	0.5167555217060168	1.5001074465959374	2.289727044668413	0.0	False	0.11960971577816973	0.0	0.0
cor	2	4	33	0 days 01:03:28.747566666	0 days 01:03:28.799566666	0.052000000000000005	True	9.0	50.0	0.42857142857142855	1.0	87.41258741258741	249.50057641971213	197.22	193.62230125658888	329.77907908065015	0.8814379080520021	0.0	44.34952251354051	115.19356497147736	57.596782485738906	-57.5967824857401	149.2727787430485	285.42955656710967	8.98509806777531	2.995032689258437	['Hover-Continuous-Mix']	40.69592235736656	0.13480578827113482	2.2886949916250106	4.77885565983576	1.0	False	0.7576183874959611	0.0	0.0
cor	2	4	34	0 days 01:03:28.806900000	0 days 01:03:28.960900000	0.154	True	9.0	97.0	0.2967032967032967	1.0	56.52680652680654	249.1473628553901	197.21999999999997	193.62230125658905	329.77907908065015	0.8730150435742134	0.0	54.256169101087636	95.99463747623116	57.59678248573922	-57.59678248573945	139.3661321555014	275.5229099795623	14.9751634462921	8.98509806777534	['Hover-Continuous-Mix', 'Continuous', 'Hover-Continuous-Mix', 'Unclassified']	65.7572530746149	0.21782178217821788	2.7297243211261875	6.469869890770687	1.0	True	0.8522239675778879	0.038	0.2435897435897436	51.15200566606675	310.1987902187402	315.2665988693086	-315.2665988693085	142.4702955905222	[278.62707341]	11.98013075703372	0.018000000000000002	0.054000000000000006	7.0	24.0	0.25	57.416267942583744
cor	2	4	35	0 days 01:03:30.286233333	0 days 01:03:30.315566666	0.029333333000000007	True	7.0	9.0	0.0	0.0	27.27272727272727	249.67950636187402	197.21999999999997	193.62230125658888	329.77907908065015	0.6652638973529263	0.0	1.497516344150548	0.0	-3.789561257387201e-15	-4.850638409455617e-13	192.1247849124384	328.28156273649955	0.0	0.0	['Hover-Continuous-Mix', 'Hover']	15.34335905074348	0.05082508250825084	2.219693445471412	3.420637249627401	1.0	False	0.2346780989030144	0.0	0.0
cor	2	4	36	0 days 01:03:31.141566666	0 days 01:03:31.188900000	0.047333334000000005	False	9.0	29.0	0.3333333333333333	1.0	54.92424242424242	249.49723449125	197.21999999999997	193.62230125658888	329.77907908065015	0.025685285863003168	-0.001996484238375729	80.60961580271443	2723.5343354759684	2598.741306756865	-2598.741306756865	113.0126854538745	232.14986604992802	130.7296481028466	124.73958272432972	['Unclassified']	233.13935180999823	0.7722772277227722	1.809582069988575	3.3992696245420486	1.0	False	0.2687862264537922	0.0	0.0
cor	2	4	37	0 days 01:03:31.732900000	0 days 01:03:31.822900000	0.09000000000000001	True	11.0	60.0	0.5	1.0	59.28853754940711	249.65191447117093	197.21999999999989	193.62230125658905	329.77907908065015	0.025906540747472718	-0.009565279903565328	4.883205471138347	358.10173458524486	-1.97716239515854e-13	-1.5817299161268314e-13	188.73909578545064	324.8958736095118	35.94039227110125	0.0	['Hover-Continuous-Mix']	27.03064948521718	0.08953938872148086	4.3475639383508735	14.278188129270587	1.0	False	0.7897333229712629	0.0	0.0
cor	2	4	38	0 days 01:03:32.662233333	0 days 01:03:32.852900000	0.19066666699999998	True	10.0	134.0	0.3333333333333333	1.0	63.4469696969697	249.65999999871138	197.21999999999997	193.62230125658903	329.77907908065015	0.02058123089364507	-0.07789284657633289	67.18486537665375	604.8854515149973	542.4889371554495	-542.4889371554498	126.43743587993522	262.5942137039964	116.13800669088009	104.15787593384636	['Unclassified', 'Hover-Continuous-Mix', 'Continuous', 'Hover-Continuous-Mix', 'Unclassified', 'Hover-Continuous-Mix', 'Unclassified']	97.67069265864912	0.3235354785478548	2.0426267426131752	5.394423654546842	2.0	True	0.9504853809495964	0.07200000000000001	0.375	59.31828631733428	374.3672848835637	270.3848955580525	-270.38489555805296	134.30401493925467	[270.46079276]	26.95529420332593	0.057999999999999996	0.128	10.0	69.0	0.2857142857142857	87.12121212121212
cor	2	4	39	0 days 01:03:42.656900000	0 days 01:03:42.770233333	0.113333333	True	9.0	40.0	0.16666666666666666	1.0	31.897926634768734	249.27810209030065	107.36642551187424	109.76138595737459	245.91816378143582	2.9157690259219176	-25.550113355118985	6.091121270887608	206.66053157849262	-79.20744983657056	-104.69806617854174	110.44849656257792	246.60527438663902	23.55930059994805	11.935579544353745	['Hover-Continuous-Mix', 'Continuous']	23.49222438391346	0.07781830814660412	1.839407964389849	4.0196992812326515	2.0	True	0.9621402513588936	0.10400000000000001	0.912280701754386	5.66886231492859	226.53173653796304	-86.82355078239466	-114.76518792647845	109.50662119645693	[245.66339902]	23.55930059994805	0.01	0.11199999999999999	9.0	38.0	0.2	33.216783216783206
cor	2	4	40	0 days 01:03:50.725566666	0 days 01:03:51.062900000	0.33733333400000004	True	10.0	122.0	0.2753623188405797	1.0	32.8133405056482	281.8198907517095	120.95600170090931	73.964791833164	73.964791833164	2.4332668869800056	-20.59134432877622	6.994300239249594	43.29933263584924	-29.958349231180854	-26.020316979709772	80.95909207241363	83.71057136235444	14.635174430917854	8.794867139141928	['Unclassified', 'Hover-Continuous-Mix', 'Hover']	57.99301582347021	0.19210264221688444	1.5153537981232383	4.477347360409804	4.0	False	0.5952309794657149	0.0	0.0
cor	2	4	41	0 days 01:03:51.070233333	0 days 01:03:51.170233333	0.1	True	5.0	23.0	0.0	0.0	20.90909090909091	283.5233990447859	119.43348005358459	79.85225250866328	86.15225250866327	0.8553942527917318	-22.399719560049363	5.1861276293794125	0.0	30.767479914454594	0.0	79.20760029442248	79.20760029442248	5.684341886080803e-14	0.0	['Hover']	22.596583329276754	0.07485148514851486	1.2750939055033796	3.731353145749442	1.0	False	0.15045310468297818	0.0	0.0
cor	2	4	42	0 days 01:03:51.851566666	0 days 01:03:51.942233333	0.09066666699999999	True	9.0	26.0	0.16666666666666666	0.0	26.262626262626267	282.6183849944509	120.308880112228	74.61419058721374	74.61419058721374	3.161057952037047	-30.655017413579806	32.5921918563358	1609.501366782391	1093.4800569513573	1092.733504511656	107.20638244354951	208.36231334065968	139.01481571864076	98.34601540604916	['Hover-Continuous-Mix', 'Unclassified']	160.60710902466548	0.532013201320132	1.6384918767166918	4.261461028739623	2.0	False	0.6856992996804891	0.0	0.0
cor	2	4	43	0 days 01:04:01.266900000	0 days 01:04:01.327566666	0.060666665999999994	True	6.0	20.0	0.2083333333333333	0.0	29.32551319648094	277.9172746143034	196.16641743006318	0.0	0.0	0.21789998530650426	-0.0014326687613476895	1.494483024423067	0.0	-1.8336586729292904e-15	-1.8336586729292904e-15	1.494483024423067	1.494483024423067	0.0	0.0	['Hover']	7.52062425193543	0.02491216863621847	1.767884153336218	4.956487032304542	1.0	False	0.08544788417990717	0.0	0.0
cor	2	4	44	0 days 01:04:03.434900000	0 days 01:04:03.486233333	0.051333332999999995	True	6.0	26.0	0.7	0.5	45.45454545454545	277.5079868825151	196.1296797443317	0.0	0.0	0.7925324857204494	0.00031320342059207887	1.4944830244230662	0.0	0.0	0.0	1.4944830244230662	1.4944830244230662	0.0	0.0	['Hover']	7.012574191523617	0.02322924600152323	1.7498612891485563	3.3856844188742112	1.0	False	0.08536854638008665	0.0	0.0
cor	2	4	45	0 days 01:04:05.858233333	0 days 01:04:05.906900000	0.048666667	True	7.0	35.0	0.5142857142857142	1.0	63.63636363636363	277.01169731200355	195.03139121956755	0.0	0.0	0.3243763533466145	-0.00019270470302337487	12.732995368084525	836.9104936769168	8.367351256310941e-13	8.367351256310941e-13	12.732995368084525	12.732995368084524	47.823456781538106	0.0	['Continuous', 'Hover-Continuous-Mix']	26.542018513753646	0.08792079207920793	1.6937677563371178	3.925369359746983	1.0	True	0.8489790373499337	0.044000000000000004	0.88	14.26551977858381	924.1468088764453	8.65570241744122e-13	8.65570241744122e-13	14.26551977858381	[14.26551978]	47.823456781538106	0.0	0.042	7.0	35.0	0.5142857142857142	72.31404958677686
cor	2	4	46	0 days 01:04:07.118900000	0 days 01:04:07.272900000	0.154	True	9.0	87.0	0.2222222222222222	1.0	50.69930069930069	277.02	194.94	0.0	0.0	0.0015195627211689535	-0.0003048621799684283	69.3976604417993	680.181376500242	661.0213377255874	661.0213377255874	69.3976604417993	69.3976604417993	74.72415122115332	68.74621912346106	['Unclassified', 'Hover-Continuous-Mix', 'Unclassified']	98.17603868133068	0.32520944402132523	3.149623181870199	8.46468166310746	3.0	False	0.3591315374201836	0.0	0.0
cor	2	4	47	0 days 01:04:10.325566666	0 days 01:04:10.519566666	0.19399999999999998	True	10.0	135.0	0.5	1.0	63.26148078725398	277.0199999999999	194.93999999999988	0.0	0.0	0.013818656430375805	0.0004196045477757497	88.4500683666387	1548.4263977631574	-5.250691061781853e-13	-5.250691061781853e-13	88.4500683666387	175.47811192428605	303.38975385531137	0.0	['Unclassified', 'Hover-Continuous-Mix', 'Unclassified']	148.58550811892823	0.4921914871899562	3.996574148477442	10.305895315702386	1.0	False	0.7606594505902795	0.0	0.0
cor	2	4	48	0 days 01:04:12.556233333	0 days 01:04:12.774900000	0.21866666699999998	True	10.0	124.0	0.35294117647058826	1.0	51.239669421487605	277.0191406701428	194.9399999792814	0.0	0.0	0.4175749965107131	0.05149299835005002	82.94601703283058	1188.4513463895144	1.5874816612763838e-12	1.5874816612763838e-12	82.94601703283058	154.73777261279008	261.4592962056932	0.0	['Hover-Continuous-Mix', 'Unclassified', 'Hover-Continuous-Mix', 'Unclassified', 'Hover-Continuous-Mix', 'Unclassified', 'Hover-Continuous-Mix', 'Unclassified']	132.1938166148766	0.437893789378938	2.800023325864216	7.446985461365068	4.0	False	0.6605319756053561	0.0	0.0
cor	2	4	49	0 days 01:04:21.177566666	0 days 01:04:21.277566666	0.1	True	11.0	69.0	0.16666666666666666	1.0	62.72727272727273	277.85627983638267	194.1491263181203	0.7606489277495884	0.7606489277495884	2.887575894993076	0.4943896233588818	26.199824832842523	627.6828702576878	-152.79899521972055	-149.4483024423102	26.96047376059211	26.96047376059211	62.76828702576882	14.944830244230662	['Continuous', 'Fragmented-Continuous-Mix', 'Unclassified']	65.15945986484564	0.21584158415841587	3.1808040021330357	7.1671604313716	2.0	True	0.9802709708337742	0.08	0.8	29.98505945938467	343.1307764685113	258.2894592293793	261.5345292740359	30.711626151894013	[30.71162615]	26.900694439615243	0.0	0.078	11.0	61.0	0.0	69.31818181818183
cor	2	4	50	0 days 01:04:23.968900000	0 days 01:04:24.001566666	0.032666666000000004	True	3.0	4.0	0.0	0.0	10.695187165775401	275.7460708125037	190.8274272310489	4.0763095599028105	4.0763095599028105	3.552251104815495	1.4001707372635848	2.581826535479745	0.0	-0.04625704900767804	0.0	1.4944830244230658	1.4944830244230658	0.0	0.0	['Hover-Continuous-Mix']	11.955864195384526	0.0396039603960396	1.8206500800128909	3.628545786396984	1.0	False	0.2776292934308553	0.0	0.0
cor	2	4	51	0 days 01:04:35.343566666	0 days 01:04:35.400900000	0.057333334000000014	True	8.0	33.0	0.1	1.0	51.72413793103448	278.1897751438779	123.05163713232048	71.85880050001035	71.85880050001035	3.35592925881076	10.71529436605188	1.3708676967199005	0.0	-3.2806454169649766	1.2544754507212806e-13	73.22966819673027	73.22966819673023	2.1316282072803006e-13	1.4210854715202004e-14	['Hover']	16.903118345198816	0.05599180607715944	1.5011570753450352	2.856682348590028	2.0	False	0.17262314741292634	0.0	0.0
cor	2	4	52	0 days 01:04:56.872900000	0 days 01:04:56.916900000	0.044	True	6.0	6.0		0.0	11.857707509881422	248.49053450673821	193.2650182360676	192.68345619636816	328.8402340204293	2.3023065031074803	-10.081904252518454	0.5586712839297497	0.0	-2.1225169929667915	-6.326919664507327e-13	192.1247849124384	328.28156273649967	0.0	0.0	['Hover']	10.916223830568486	0.03616013775290574	1.6855327710977872	2.9143653536165965	1.0	False	0.1424434534267793	0.0	0.0
cor	2	4	53	0 days 01:05:08.560900000	0 days 01:05:08.612900000	0.052000000000000005	True	6.0	11.0	0.0	0.0	18.51851851851852	283.4975879129165	114.41957240084305	85.23924681697173	100.23924681697174	2.785183455817097	-22.54419351842707	2.7632206165926814	0.0	2.222922604351308	-2.6947991163642317e-13	88.00246743356443	103.00246743356443	1.1368683772161605e-13	0.0	['Hover-Continuous-Mix', 'Unclassified']	67.19638487591119	0.22258892555922266	1.7290442543676652	3.3901617117509546	1.0	False	0.1949549269581901	0.0	0.0
cor	2	4	54	0 days 01:05:09.210233333	0 days 01:05:09.304900000	0.094666667	False	7.0	28.0	0.07142857142857142	0.0	26.51515151515152	274.1121809751719	118.26836049336464	83.26262406186561	188.21680696791276	3.1026750454762184	-26.57337848110775	5.831775325803472	0.0	13.46838174476038	1.4802973661668753e-13	82.1621601417893	97.16216014178933	7.105427357601003e-14	1.4210854715202004e-14	['Unclassified']	217.0736592974503	0.719059405940594	1.7914984856319556	2.795377076940037	2.0	False	0.37059012928929	0.0	0.0
cor	2	4	55	0 days 01:05:15.574233333	0 days 01:05:15.622900000	0.048666667	True	8.0	21.0	0.0	1.0	38.18181818181819	277.33054972172533	194.9537806870486	0.0	0.0	0.2415941377827297	-4.562294999265527	1.4944830244230658	0.0	0.0	0.0	1.4944830244230658	1.4944830244230658	0.0	0.0	['Hover']	5.1410216040153465	0.01702970297029703	1.5887413923055749	3.5881476073428833	1.0	False	0.06353506130605974	0.0	0.0
cor	2	4	56	0 days 01:05:16.558233333	0 days 01:05:16.623566666	0.06533333300000001	True	6.0	25.0	0.3666666666666667	1.0	34.435261707988985	277.02	194.94	0.0	0.0	0.06688781183110097	-0.95680632679858	1.4944830244230658	0.0	0.0	0.0	1.4944830244230658	1.4944830244230658	0.0	0.0	['Hover']	5.977932097692263	0.0198019801980198	1.4501902495320984	3.917232122360919	1.0	False	0.07320506177577497	0.0	0.0
cor	2	4	57	0 days 01:05:20.878900000	0 days 01:05:20.944233333	0.06533333300000001	True	9.0	20.0	0.0	0.0	27.54820936639118	277.06209479052404	194.93999999999997	0.0	0.0	0.2901423761199753	0.0006362038517620468	1.4944830244230658	0.0	0.0	0.0	1.4944830244230658	1.4944830244230658	0.0	0.0	['Hover']	8.061150859009265	0.02670267026702671	1.8360769544053452	4.6488746744085265	1.0	False	0.09571570861581016	0.0	0.0
cor	2	4	58	0 days 01:05:27.494233333	0 days 01:05:27.668900000	0.174666667	True	9.0	111.0	0.5238095238095238	1.0	57.33471074380166	277.30106974228437	194.27344743451968	0.6347431223978609	0.6347431223978609	0.16507595430670075	-0.021264563720012283	69.98930682037263	1502.5814141758608	0.1272045173118799	5.084902196275917e-12	70.62404994277048	127.8717860733417	267.4493615842102	0.0	['Unclassified', 'Hover-Continuous-Mix', 'Continuous', 'Hover-Continuous-Mix', 'Unclassified', 'Hover-Continuous-Mix', 'Unclassified']	146.79899162628388	0.4862736273627362	2.373824101608518	7.03089165204782	3.0	True	0.8116519580253325	0.024	0.13636363636363635	30.74057791153682	679.5644738806054	684.9731125301196	684.9713861939048	31.384143512884393	[31.38414351]	14.944830244230676	0.018000000000000002	0.04	5.0	20.0	0.5	75.75757575757576
cor	2	4	59	0 days 01:05:28.354233333	0 days 01:05:28.407566666	0.053333333	True	8.0	41.0	0.5	2.0	69.02356902356902	278.1516191686091	194.93970382010124	0.0	0.0	0.5789460089471837	-0.07516387855336433	1.4944830244230662	0.0	-2.1053118096595556e-15	-2.1053118096595556e-15	1.4944830244230662	1.4944830244230662	0.0	0.0	['Hover']	5.535122312678023	0.018335166850018337	1.6825714669564624	2.866782721341321	1.0	False	0.06257744566878028	0.0	0.0
cor	2	4	60	0 days 01:05:29.444233333	0 days 01:05:29.511566666	0.06733333300000001	True	8.0	33.0	0.5833333333333333	1.0	44.11764705882353	278.1599999998666	194.93999999986684	0.0	0.0	0.1645006226703003	0.09151847430474253	152.62852058563126	174.20020639834843	-2.1399875335833608e-13	-2.1399875335833608e-13	152.62852058563126	167.62852058563126	11.845614035087692	0.0	['Unclassified', 'Hover-Continuous-Mix', 'Continuous']	128.61345086652616	0.4260337798485731	1.4585461816024363	2.6767002348942652	1.0	True	0.8055473347230268	0.002	0.029411764705882356	152.8027207920296	0.0	0.0	0.0	152.8027207920296	[167.80272079]	0.0	0.066	0.066	1.0	1.0		45.45454545454545
cor	2	4	61	0 days 01:05:30.582900000	0 days 01:05:30.632233333	0.049333333	True	6.0	19.0	0.375	1.0	34.54545454545455	277.2154663323629	194.51326818305085	0.39467894268906506	0.39467894268906506	0.4592297329517254	0.3972282976684061	1.0998040817340011	0.0	1.2924993930853537	-6.7146288529329464e-15	1.4944830244230665	1.4944830244230658	1.9984014443252818e-15	2.220446049250313e-16	['Hover']	2.9889660488461316	0.0099009900990099	2.2077141837312717	5.271805742074076	1.0	False	0.042338635396642114	0.0	0.0
cor	2	4	62	0 days 01:05:32.346900000	0 days 01:05:32.412900000	0.066	True	8.0	24.0	0.0	0.0	32.085561497326196	277.29086874144366	194.06030258788383	0.8478579751206624	0.8478579751206624	0.27529076542448266	0.4922408815478136	14.536526099822664	307.6876814988665	221.5873767767315	219.7769153563332	15.384384074943329	15.384384074943323	20.922762341922965	14.944830244230662	['Continuous']	28.483088230180787	0.09435061153174143	1.4217226024521117	2.7250157742863266	1.0	True	0.8551356107698265	0.068	1.0	14.536526099822664	307.6876814988665	221.5873767767315	219.7769153563332	15.384384074943329	[15.38438407]	20.922762341922965	0.0	0.066	8.0	24.0	0.0	32.085561497326196
cor	2	4	63	0 days 01:05:33.882233333	0 days 01:05:34.077566666	0.19533333300000005	True	11.0	181.0	0.5	2.0	83.95176252319109	277.0921952578099	194.01184850390555	0.8957446234564803	0.8957446234564803	0.1655247751136461	0.2530808709494143	92.42053810791631	1288.2884252039755	-75.71393332779837	-76.24913389913286	93.31628273137285	180.84563990398362	252.5045313399797	14.944830244230662	['Continuous', 'Hover-Continuous-Mix', 'Unclassified', 'Hover-Continuous-Mix', 'Unclassified']	107.75527602625898	0.3569407961204284	2.7095179588254648	8.786310525285032	3.0	True	0.8146303355991775	0.013999999999999999	0.07142857142857142	18.079235031665405	460.9808211462804	428.25102493326983	426.99514983516167	19.001284167664696	[19.00128417]	5.977932097692263	0.0	0.012	4.0	10.0	1.0	64.93506493506493
cor	2	4	64	0 days 01:05:35.565566666	0 days 01:05:35.624900000	0.059333334	True	8.0	33.0	0.16666666666666666	1.0	50.0	277.0293295607032	193.84434956460188	1.0630633904659132	1.0630633904659132	0.5533699461940532	0.1114213673091502	0.43141963395715255	0.0	-1.2704598805448826	0.0	1.4944830244230665	1.4944830244230665	1.3322676295501877e-15	0.0	['Hover-Continuous-Mix']	17.634899688192178	0.058415841584158426	2.5923720788368976	5.135311844489734	1.0	False	0.24987050737655594	0.0	0.0
cor	2	4	65	0 days 01:05:41.197566666	0 days 01:05:41.307566666	0.11	True	10.0	57.0	0.0	1.0	47.10743801652893	276.8929603607087	194.6312256051969	0.2758012056187387	0.2758012056187387	0.3530407246835586	0.520657269237379	21.32627160195103	217.3793490069914	30.499993437959336	27.172418625873622	21.602072807569765	21.602072807569762	26.90069443961525	2.988966048846134	['Continuous']	22.933521320237585	0.07596759675967599	1.059529789822052	2.8484978202858615	1.0	True	0.9435819607598668	0.11	1.0	21.32627160195103	217.3793490069914	30.499993437959336	27.172418625873622	21.602072807569765	[21.60207281]	26.90069443961525	0.0	0.10800000000000001	10.0	57.0	0.0	47.10743801652893
cor	2	4	66	0 days 01:06:49.966900000	0 days 01:06:50.106900000	0.14	True	11.0	83.0	0.14285714285714285	1.0	53.1370038412292	277.93688912022384	194.9399980493367	0.0	0.0	0.297298416962402	-13.783916753619346	11.134950984785943	294.6867935482101	-7.685870719207843e-14	-7.685870719207843e-14	11.134950984785943	11.134950984785938	41.84552468384585	0.0	['Hover-Continuous-Mix', 'Continuous', 'Hover-Continuous-Mix']	29.342385014728944	0.0971970436480268	1.6475591661433473	4.727660547199282	2.0	True	0.9327608288761144	0.10800000000000001	0.7605633802816901	14.169913120455735	387.34113910642054	-1.0105496686365867e-13	-1.0105496686365867e-13	14.169913120455735	[14.16991312]	41.84552468384585	0.032	0.138	11.0	68.0	0.2	57.239057239057246
cor	2	4	67	0 days 01:06:54.992900000	0 days 01:06:55.033566666	0.040666666	True	9.0	24.0	0.0	1.0	51.948051948051955	277.87299529828937	194.9399999999999	0.0	0.0	0.04309398488760563	0.00725791549312063	1.4944830244230658	0.0	0.0	0.0	1.4944830244230658	1.4944830244230658	0.0	0.0	['Hover-Continuous-Mix']	20.353435475476047	0.06742102781706744	1.4930427185746662	2.3069703829235184	0.0	False	0.5680886468907055	0.0	0.0
cor	2	4	68	0 days 01:06:56.752900000	0 days 01:06:56.833566666	0.08066666600000001	True	8.0	26.0	0.2	0.0	28.824833702882486	277.02	194.93999999999997	0.0	0.0	0.0423215274062818	0.10088452449716527	1.4944830244230658	0.0	0.0	0.0	1.4944830244230658	1.4944830244230658	0.0	0.0	['Hover-Continuous-Mix']	20.412451065290657	0.06761651774933591	1.403360798045364	3.4641174170057445	1.0	False	0.30037805847312715	0.0	0.0
cor	2	4	69	0 days 01:06:58.153566666	0 days 01:06:58.363566666	0.21	True	11.0	172.0	0.48	1.0	74.45887445887445	277.7143313661261	194.93999999999997	0.0	0.0	0.2528496899101085	0.2922336932895788	84.13935905824502	621.9332178394158	607.7000461782425	607.7000461782425	84.13935905824502	92.85364477253073	133.59494179512342	127.61700969743114	['Unclassified', 'Hover-Continuous-Mix', 'Continuous', 'Fragmented-Continuous-Mix', 'Continuous']	112.4705224665816	0.3725601131541726	3.646999554851563	9.58581666658811	1.0	True	0.9270879615857126	0.092	0.4380952380952381	95.23888890191458	433.6251205813225	431.86560962574515	431.86560962574515	95.23888890191458	[ 97.93512135 140.82104438]	44.23571009028001	0.064	0.20800000000000002	11.0	79.0	0.5555555555555556	78.06324110671936
cor	2	4	70	0 days 01:07:01.106900000	0 days 01:07:01.205566666	0.098666666	True	10.0	55.0	0.2857142857142857	1.0	50.0	276.9296447586558	193.76000465023185	1.1471233482247585	1.1471233482247585	0.2292530756457867	-0.009905762713079969	16.18887973508281	418.4552468384584	119.64397953142328	119.55864195384498	17.336003083307563	17.33600308330756	41.845524683845866	11.955864195384526	['Hover-Continuous-Mix', 'Continuous']	24.449742279561356	0.08099009900990099	2.7720825440999914	5.1869759951931895	2.0	True	0.9729071735392424	0.096	0.96	16.848861606845762	435.8908821233943	124.64071626048704	124.54025203525521	17.996066419094422	[17.99606642]	41.845524683845866	0.004	0.098	10.0	54.0	0.2857142857142857	51.13636363636364
cor	2	4	71	0 days 01:07:02.346233333	0 days 01:07:02.413566666	0.06733333300000001	True	6.0	20.0	0.2857142857142857	0.0	26.737967914438507	277.02	194.93999999999997	0.0	0.0	0.3523910153141052	-0.0707663355279305	1.4944830244230662	0.0	0.0	0.0	1.4944830244230662	1.4944830244230662	0.0	0.0	['Hover']	9.758095041821194	0.032323820617355864	1.277086911786392	2.1681716939615043	0.0	False	0.1364095325499382	0.0	0.0
cor	2	4	72	0 days 01:07:03.357566666	0 days 01:07:03.426233333	0.068666667	True	6.0	22.0	0.0	0.0	29.411764705882355	276.98568195426793	194.1156366581453	0.7916527831711453	0.7916527831711453	0.26945018325799985	6.530229804941106e-05	0.7028302412519211	0.0	1.486708531626715	0.0	1.4944830244230662	1.4944830244230662	0.0	0.0	['Hover']	4.747181371696799	0.0157251019219569	2.039209289509964	4.9989837772215315	1.0	False	0.046790225395914695	0.0	0.0
cor	2	4	73	0 days 01:07:04.322900000	0 days 01:07:04.364233333	0.041333333	True	7.0	22.0	0.3333333333333333	1.0	47.61904761904761	277.0916946212626	194.9676915509231	0.0	0.0	0.3748867382538624	0.06738525296644061	183.82694802678301	282.03842940684984	-3.4647417210397264e-13	-3.4647417210397264e-13	183.82694802678301	198.82694802678301	11.845614035087692	0.0	['Hover-Continuous-Mix']	18.6454548761354	0.06176331918906178	2.6387376751568405	4.945689152142144	1.0	False	0.487635057593055	0.0	0.0
cor	2	4	74	0 days 01:07:04.420900000	0 days 01:07:04.539566666	0.11866666599999999	True	10.0	79.0	0.5	1.0	59.84848484848485	277.14057634857176	194.8206671434551	0.08706741474698725	0.08706741474698725	0.4592029318237485	0.07823046719478004	128.6050309011178	1301.6510323174941	-494.479639759618	-492.8674469980661	128.6920983158648	258.79103724872294	95.084485910869	59.14409363976793	['Unclassified', 'Hover-Continuous-Mix', 'Unclassified']	132.5108281655118	0.43894389438943904	3.2277317014481346	9.444655729074428	1.0	False	0.6530031970530866	0.0	0.0
cor	2	4	75	0 days 01:07:06.098233333	0 days 01:07:06.156233333	0.057999999999999996	False	10.0	39.0	0.4166666666666666	1.0	61.128526645768034	277.45876101276343	194.94465191755958	0.0	0.0	0.4304089455246557	0.2829666250264563	2.1128897931498525	309.20338436339296	0.0	0.0	2.1128897931498525	2.1128897931498525	17.933796293076796	0.0	['Unclassified']	236.6436568327834	0.7838852850802323	3.230228789245724	7.613151610072196	1.0	False	0.4070160090030144	0.0	0.0
cor	2	4	76	0 days 01:07:07.594900000	0 days 01:07:07.851566666	0.25666666600000004	True	11.0	236.0	0.4545454545454545	2.0	83.15715292459478	277.01999864761984	193.86196125890262	1.045425127000792	1.045425127000792	0.4439163516847312	0.3878129531238579	113.25413684625391	913.7834927569032	-743.0193459202937	-743.42666029545	114.29956197325468	210.89366794762157	195.55783727735096	142.70977885988034	['Hover-Continuous-Mix', 'Continuous', 'Hover-Continuous-Mix', 'Unclassified']	41.45162993322272	0.13730907974518386	4.366586674792322	15.15874874456939	3.0	True	0.989449175395266	0.168	0.6511627906976745	112.0597421529714	490.9703627428083	-264.8934875773168	-265.0070230189816	113.12149865747651	[226.20079499]	91.3791729061424	0.038	0.204	11.0	186.0	0.5	100.64935064935064
cor	2	4	77	0 days 01:07:10.971566666	0 days 01:07:11.004900000	0.033333334	True	6.0	16.0	0.0	1.0	42.78074866310161	277.87586106555364	194.55001706022858	0.3598157265340333	0.3598157265340333	0.1705063660150999	0.9451078274162308	1.1346672978890329	0.0	1.4894350410479194	9.874454195489621e-15	1.4944830244230658	1.4944830244230658	1.5543122344752194e-15	2.220446049250313e-16	['Hover']	2.9889660488461316	0.0099009900990099	1.9865842510611549	3.0075767245858374	1.0	False	0.040791194580265484	0.0	0.0
cor	2	4	78	0 days 01:07:17.149566666	0 days 01:07:17.213566666	0.064	True	6.0	29.0	0.4166666666666666	0.0	41.19318181818181	276.35854991457273	188.05585270219726	6.849621498131933	6.849621498131933	3.5830149730840777	5.481125277179366	3.3315441057502038	233.51297256610405	-240.92321728478515	-233.51297256610403	10.18116560388214	10.181165603882137	14.94483024423068	14.944830244230658	['Hover-Continuous-Mix', 'Unclassified', 'Hover-Continuous-Mix']	136.09136041152544	0.4508044554455445	1.0002415870553605	2.4085359401725714	0.0	False	0.6849983653784697	0.0	0.0
cor	2	4	79	0 days 01:07:47.807566666	0 days 01:07:47.850900000	0.043333334	True	6.0	13.0	0.0	0.5	26.85950413223141	245.1617084847342	174.62611710037731	174.0631289259834	310.21990675004463	2.5653159659657354	3.8168171925143857	18.061655986454998	0.0	-4.503771909698568	1.6226212292994285e-12	192.1247849124384	328.2815627364996	3.410605131648481e-13	5.684341886080803e-14	['Hover']	10.733105357220198	0.03555355535553557	1.6408328851144427	4.077819202522363	1.0	False	0.11277979612591058	0.0	0.0
cor	2	4	80	0 days 01:07:51.098900000	0 days 01:07:51.126900000	0.027999999999999997	True	6.0	10.0	0.5	1.0	30.303030303030305	244.8877224765544	172.55505571610774	171.99360440977534	308.1503822338365	2.5510766785905066	-2.334354825126184	20.131180502663067	0.0	-1.804470210724796	-2.273736754432321e-14	192.1247849124384	328.28156273649955	2.273736754432321e-13	0.0	['Hover-Continuous-Mix']	28.494809665666466	0.0943894389438944	1.901104892075012	3.4170591722998243	1.0	False	0.3409860965589977	0.0	0.0
cor	2	4	81	0 days 01:07:54.280900000	0 days 01:07:54.311566666	0.030666666	True	9.0	20.0	0.3333333333333333	1.0	56.81818181818181	246.38934749060516	166.47603854014875	165.90642734212582	302.06320516618695	3.480535846661253	-5.1457656904361215	5.253128745503519	0.0	3.1028995699402597	2.131628207280301e-14	171.1595560876293	307.3163339116905	2.842170943040401e-13	0.0	['Hover-Continuous-Mix']	25.032590659086356	0.08292079207920793	1.4279828372187762	2.097918892117841	0.0	False	0.40000278678022416	0.0	0.0
cor	2	4	82	0 days 01:08:05.441566666	0 days 01:08:05.534233333	0.092666667	True	10.0	60.0	0.3333333333333333	1.0	59.28853754940711	252.66240032196615	166.35119615616836	165.74711538822012	301.9038932122813	3.5344485930762595	5.4286419945323345	27.33759066356891	390.656437729358	64.63082828192648	-65.10940628822661	138.4095247246512	274.56630254871243	35.94039227110125	5.990065378516874	['Hover-Continuous-Mix', 'Continuous', 'Unclassified', 'Fragmented-Continuous-Mix']	49.57784989716519	0.16422729229444685	1.7227285911261103	4.355971150647894	1.0	True	0.9025834333388858	0.07400000000000001	0.8043478260869565	28.58489958715378	355.6553222119661	201.81354155884725	-202.36707359854228	137.16188772307413	[273.31866555]	26.955294203325963	0.006	0.078	10.0	55.0	0.3333333333333333	67.56756756756756
cor	2	4	83	0 days 01:08:17.217566666	0 days 01:08:17.321566666	0.104	True	11.0	95.0	0.5	2.0	83.04195804195804	245.93975044066943	136.73104347037636	136.1643519875836	272.32112981164465	2.479889001680325	1.5731502401222357	41.65567289885968	462.1079556348724	13.367418506741377	-14.185007098935413	94.50867908872395	230.665456912785	46.58398664773733	0.0	['Fragmented-Continuous-Mix', 'Unclassified', 'Hover-Continuous-Mix', 'Continuous', 'Hover-Continuous-Mix', 'Unclassified']	85.7603335553544	0.2840822543792841	3.701703266047085	6.849508179917526	2.0	True	0.8040218414124556	0.012	0.1153846153846154	40.95211184286492	627.9742791733457	725.8770597357677	-726.482565974653	95.23173463833857	[231.38851246]	8.717790791695819	0.02	0.03	7.0	14.0	0.5	106.06060606060606
cor	2	4	84	0 days 01:08:29.891566666	0 days 01:08:30.004233333	0.112666667	True	10.0	95.0	0.4615384615384616	2.0	77.11038961038962	271.87650088556074	117.66931630385388	87.26653439581908	223.4233122198802	1.69692338409848	-0.7062972366057098	44.50171002792263	545.4134967949832	547.0617906820138	545.4134967949848	131.76824442374166	267.9250222478028	59.58879529640936	59.58879529640913	['Continuous']	45.47498345744474	0.15063649222065065	1.6732890473519295	3.6161448853033855	2.0	True	0.9819443378167676	0.11199999999999999	1.0	44.50171002792263	545.4134967949832	547.0617906820138	545.4134967949848	131.76824442374166	[267.92502225]	59.58879529640936	0.0	0.11	10.0	95.0	0.4615384615384616	77.11038961038962
cor	2	4	85	0 days 01:08:30.197566666	0 days 01:08:30.282900000	0.08533333400000001	True	9.0	66.0	0.5833333333333333	1.0	69.76744186046511	271.9454290830517	116.76292228530485	87.31860390874179	223.47538173280293	1.3305686566044486	0.12307974441327145	2.933422929838708	101.36966036855594	35.363278776623176	-33.789886789518405	84.38518097890307	220.54195880296425	14.5296513194927	2.90593026389854	['Hover-Continuous-Mix', 'Unclassified']	61.58660277389936	0.2040064471563436	2.7032204296896603	4.554413204606972	2.0	False	0.6355011077403535	0.0	0.0
cor	2	4	86	0 days 01:08:30.967566666	0 days 01:08:31.025566666	0.057999999999999996	True	10.0	76.0	0.8295454545454546	3.0	119.1222570532915	271.2938301903058	117.08370223398191	87.92182386158353	224.07860168564468	0.7432052135694527	2.263792514415629	26.200739241922218	0.0	-0.38874972894940935	-1.2544754507212806e-13	99.6830820171146	114.6830820171146	0.0	0.0	['Unclassified', 'Hover-Continuous-Mix', 'Unclassified']	53.69832108444257	0.17787640833048826	7.135228686345253	12.398117908918106	1.0	False	0.5127788803916017	0.0	0.0
cor	2	4	87	0 days 01:08:31.035566666	0 days 01:08:31.104900000	0.06933333400000001	True	9.0	35.0	0.0	1.0	45.45454545454545	271.2832615810616	117.31551977001992	87.90150888949316	224.05828671355428	0.824555202693451	2.5016054032856716	56.62441865240469	801.1577469098123	800.7240882752395	801.1577469098114	130.12707639968747	145.12707639968747	56.0810422836869	56.0810422836869	['Unclassified', 'Hover-Continuous-Mix', 'Continuous']	153.205859760856	0.5074964639321075	3.592323719855765	8.823163352767477	1.0	True	0.8208898112358739	0.006	0.08571428571428573	82.24342051608764	0.0	-0.6896998271914372	0.0	155.7641243008015	[170.7641243]	0.0	0.064	0.068	2.0	2.0		30.303030303030305
cor	2	4	88	0 days 01:08:31.316900000	0 days 01:08:31.394233333	0.077333333	True	6.0	26.0	0.5	0.0	30.303030303030305	271.3122032057772	117.40643173958222	87.86074877701846	224.01752660107962	1.0365322025479882	3.4902006699439885	12.176947451613936	37.25551620382826	-37.11779449050353	-37.25551620382818	100.03769622863243	236.1944740526935	2.9059302638988527	2.905930263898597	['Unclassified', 'Hover-Continuous-Mix']	78.78607944138004	0.2609799441482609	1.4358434765581287	4.126722293543371	1.0	False	0.3091229789056895	0.0	0.0
cor	2	4	89	0 days 01:08:31.925566666	0 days 01:08:32.046900000	0.121333334	True	10.0	66.0	0.3333333333333333	1.0	49.180327868852466	271.3277338998877	118.13970145072977	87.74796298664627	223.9047408107074	1.4096476268056592	6.01750164504652	5.434914116072587	229.12052482635897	47.39890225514308	-47.978511641564204	82.42205343400985	174.42906803706742	41.40305124862336	5.853378420270943	['Unclassified', 'Hover-Continuous-Mix', 'Unclassified']	127.00655735424877	0.4207109235513716	1.6195463939331496	4.5423865087675335	2.0	False	0.6178509004856614	0.0	0.0
cor	2	4	90	0 days 01:08:33.088233333	0 days 01:08:33.129566666	0.041333333	True	5.0	14.0	0.5	0.0	30.303030303030305	270.2256892711523	119.19778881637293	88.69970883881577	224.8564866628769	2.5000658119677586	8.556037461442909	2.6700867028228035	69.18881580710963	-68.02296414368395	69.18881580710963	86.02962213599297	222.18639996005416	2.905930263898611	2.905930263898611	['Hover-Continuous-Mix']	21.91908435820497	0.07260726072607263	1.9471199698805757	4.252365082754427	1.0	False	0.5028327601153012	0.0	0.0
cor	2	4	91	0 days 01:08:45.609566666	0 days 01:08:45.646900000	0.037333333999999996	True	7.0	15.0	0.0	1.0	35.88516746411483	277.80810608873213	194.37068937601157	0.5389492307266931	0.5389492307266931	0.09819720556873184	0.3891017367330692	0.9555337936963729	0.0	-0.8092353333937201	-2.9917588874109484e-15	1.4944830244230658	1.4944830244230658	4.440892098500626e-16	0.0	['Hover']	2.988966048846132	0.009900990099009905	1.7924541945076506	3.083394319534254	1.0	False	0.0540975195210844	0.0	0.0
cor	2	4	92	0 days 01:08:48.186900000	0 days 01:08:48.405566666	0.218666666	True	10.0	164.0	0.3636363636363637	1.0	67.76859504132231	278.1599999999999	193.7999999999998	1.1106409826971435	1.1106409826971435	0.02995518469117668	0.2085760587402775	105.35310368612362	1388.3989037419178	-81.51725587762074	-81.51725587762049	106.4637446688208	176.01058509474063	499.103930267214	17.933796293076796	['Hover-Continuous-Mix', 'Unclassified', 'Hover-Continuous-Mix', 'Unclassified', 'Hover-Continuous-Mix', 'Unclassified']	165.26265008256524	0.5474347434743474	2.289601546811616	8.808079606019257	4.0	False	0.750608058967758	0.0	0.0
cor	2	4	94	0 days 01:08:50.694900000	0 days 01:08:50.764233333	0.06933333300000001	True	8.0	34.0	0.4365079365079365	1.0	44.15584415584416	278.15017526674364	194.0230832578809	0.8875305832106184	0.8875305832106184	0.5932226789162812	-0.2194772309985644	0.6069524412124477	0.0	3.3838191585762947	0.0	1.4944830244230662	1.4944830244230662	4.440892098500626e-16	0.0	['Hover-Continuous-Mix']	37.06317900569203	0.12277227722772277	2.189664939850338	3.931380050005189	3.0	False	0.4566265057382039	0.0	0.0
cor	2	4	95	0 days 01:08:50.868233333	0 days 01:08:50.914900000	0.046666667	True	4.0	5.0	0.0	0.0	9.46969696969697	278.1395251729968	194.3590445399801	0.5515402630742889	0.5515402630742889	0.6352776298194863	-0.18774004082385	0.942942761348777	0.0	1.1126886561540188	0.0	1.4944830244230658	1.4944830244230658	0.0	0.0	['Hover']	5.977932097692263	0.0198019801980198	1.727977146191357	3.6146122669780207	1.0	False	0.10474560570573344	0.0	0.0
cor	2	4	96	0 days 01:08:53.173566666	0 days 01:08:53.224233333	0.050666667000000006	True	8.0	25.0	0.0	1.0	45.45454545454545	278.1600000000002	193.79999999999995	1.110640982697022	1.110640982697022	0.08927665964653549	0.3287634993257993	0.3838420417260439	0.0	2.2720314518664967e-12	0.0	1.4944830244230658	1.4944830244230658	4.440892098500626e-16	0.0	['Hover']	5.977932097692263	0.0198019801980198	2.2611481518641185	4.484795063132265	1.0	False	0.07308530524248584	0.0	0.0
cor	2	4	97	0 days 01:08:54.069566666	0 days 01:08:54.112233333	0.042666667000000005	True	7.0	27.0	0.7083333333333333	1.0	58.441558441558435	278.1815045574487	193.8011364699305	1.1095659156544109	1.1095659156544109	0.00045717810027123113	0.2348420109028629	0.3849171087686551	0.0	-0.05961014408629948	0.0	1.4944830244230658	1.4944830244230658	2.2204460492503127e-15	0.0	['Hover-Continuous-Mix']	30.45898735490821	0.10089580386610092	1.6723747136719702	2.7670009867134557	1.0	False	0.7029478078813034	0.0	0.0
cor	2	4	98	0 days 01:08:55.248900000	0 days 01:08:55.394233333	0.145333333	True	9.0	81.0	0.375	1.0	50.435865504358645	278.15452374964445	193.79999999999995	1.1106253473034169	1.1106253473034169	0.0015797386359019784	0.06903408175466902	144.70129803836275	3778.464465604138	-751.8105054977315	-751.8110909454546	145.81192338566618	200.02785034152183	358.6572163990081	109.76441927803765	['Unclassified', 'Fragmented-Continuous-Mix', 'Fragmented', 'Unclassified']	226.5063038659835	0.7503051675030517	1.736545579422332	6.7693288406087335	1.0	False	0.5374733737973192	0.0	0.0
cor	2	4	99	0 days 01:08:56.743566666	0 days 01:08:56.864900000	0.121333334	True	11.0	91.0	0.3076923076923077	1.0	67.8092399403875	278.1599999999999	193.79999999999995	1.1106409826970112	1.1106409826970112	0.0007821544351599956	-0.0018028015876147925	77.06490718633206	1384.9705627864034	1336.422964281955	1336.4229642819546	78.17554816902907	82.6017776772258	168.96640865994127	163.0436016423974	['Continuous', 'Fragmented-Continuous-Mix', 'Unclassified']	93.63793638270424	0.31017691933127745	2.6731698403390443	5.585172274109807	4.0	True	0.9687990923859116	0.07400000000000001	0.6065573770491803	32.373857050998176	634.5961306069929	646.2629294802464	646.2629294802457	33.484498033695196	[33.48449803]	47.82345678153814	0.0	0.07200000000000001	10.0	67.0	0.25	82.30958230958231
cor	2	4	100	0 days 01:08:57.394900000	0 days 01:08:57.436900000	0.042	True	6.0	19.0	0.4166666666666666	1.0	39.256198347107436	278.1599672918309	193.8	1.1106408893110271	1.1106408893110271	0.019463764626304184	-0.013872551845277177	0.3838421351120394	0.0	1.909687626699963e-06	0.0	1.4944830244230658	1.4944830244230658	1.7763568394002505e-15	0.0	['Hover']	9.102760239667766	0.030153015301530164	1.7703700438703704	3.339383398790285	1.0	False	0.1113571647715584	0.0	0.0
cor	2	4	101	0 days 01:09:00.115566666	0 days 01:09:00.243566666	0.128	True	8.0	72.0	0.38461538461538464	1.0	51.13636363636364	277.2684867340736	193.81502399800812	1.093071661781664	1.093071661781664	0.1720447680365689	0.006567512354178906	65.69045217815611	991.6747971544588	875.6892708161513	875.1871093204629	66.78352383993777	69.14534849343873	110.48141351187472	80.66056542637182	['Unclassified', 'Hover-Continuous-Mix', 'Unclassified']	127.12446226498705	0.4211014851485149	3.436718705361113	7.0598648460465085	2.0	False	0.7206890513654676	0.0	0.0
cor	2	4	102	0 days 01:09:11.174233333	0 days 01:09:11.255566666	0.08133333300000001	True	9.0	25.0	0.0	0.0	27.71618625277162	278.6572307474593	123.72882207165142	71.18295296620923	71.18295296620923	1.3936715416543433	23.824379928266072	0.9422508183251322	0.0	-3.885723453712723	0.0	70.24070214788412	70.24070214788412	0.0	0.0	['Hover-Continuous-Mix']	31.930905594990392	0.1057715527650326	2.160378641842304	4.493739499776633	3.0	False	0.3194246891719312	0.0	0.0
cor	2	4	103	0 days 01:09:11.398900000	0 days 01:09:11.430900000	0.032	True	2.0	8.0	0.5	0.0	21.390374331550802	278.5834369902564	124.80931603844928	70.10225271278685	70.10225271278685	1.2997682067226461	20.835890018812155	8.906844878334892	348.39805588094663	-257.0334804178316	-262.7203513252667	79.00909759112173	95.8418492278312	8.946715327048025	8.932491945059041	['Hover-Continuous-Mix']	43.25209694212638	0.14327315084449624	2.1822780824692742	4.653632002790344	1.0	False	0.6697220166257604	0.0	0.0
cor	2	4	104	0 days 01:09:13.105566666	0 days 01:09:13.176233333	0.070666667	True	9.0	34.0	0.2	1.0	44.15584415584416	285.5284540833581	121.23817968225023	77.44907902950641	81.73479331522068	3.75565102830717	3.4293021355850333	9.011141900993684	0.0	-143.12652433735434	-2.0788450326238362e-13	85.08231378767688	100.08231378767687	5.684341886080803e-14	0.0	['Hover-Continuous-Mix']	32.79322750734042	0.10862800565770864	1.7359178368170478	4.828849691604954	1.0	False	0.6073329404794989	0.0	0.0
cor	2	4	105	0 days 01:09:39.712233333	0 days 01:09:39.746900000	0.034666667000000005	True	2.0	4.0	0.0	0.0	10.101010101010102	311.1219074795359	188.68020102232856	184.83730777881283	199.83730777881283	1.4992614953526513	-0.1561663650875289	0.5408516097079838	0.0	-1.3419613832164334	-4.042198674546348e-13	185.37815938852074	200.37815938852074	0.0	0.0	['Hover-Continuous-Mix']	30.55387516598268	0.10121012101210122	2.013785144412655	3.577899243036195	1.0	False	0.41526259737286403	0.0	0.0
cor	2	4	106	0 days 01:09:40.089566666	0 days 01:09:40.126233333	0.036666667	True	2.0	6.0	0.8333333333333333	0.0	15.151515151515152	311.295048079004	189.41102264604342	185.56812940252763	200.56812940252763	0.8463764779813322	-1.1239165987385984	0.189970014006854	0.0	1.7643485409746984	-4.042198674546348e-13	185.37815938852074	200.37815938852074	0.0	0.0	['Hover']	9.7971664934401	0.03245324532453245	1.7343802021894652	2.4692345571508607	0.0	False	0.1715851346896009	0.0	0.0
cor	2	4	107	0 days 01:09:40.228900000	0 days 01:09:40.262900000	0.034	True	4.0	9.0	0.0	0.5	22.72727272727273	311.166890786158	189.5329363931715	185.69004314965568	200.69004314965568	0.4247798262188342	-1.4876503901888327	0.3118837611349316	0.0	0.39501749059706587	-4.042198674546348e-13	185.37815938852074	200.37815938852074	0.0	0.0	['Hover']	8.966898146538398	0.029702970297029705	1.9260944366771704	2.8800272612596336	1.0	False	0.10114177969212028	0.0	0.0
cor	2	4	108	0 days 01:09:41.148900000	0 days 01:09:41.222233333	0.073333333	True	7.0	27.0	0.0	1.0	33.169533169533175	311.2109035227153	187.92531236676228	184.08241912324652	199.08241912324652	3.3212777378514984	-3.4892219266436237	23.490461817639236	2110.7854578121537	805.4667494246839	-840.3982930298723	164.33227052607825	182.60677803483662	80.26036453012898	62.189473684210384	['Hover-Continuous-Mix', 'Unclassified', 'Fragmented-Continuous-Mix', 'Fragmented']	228.77707703600657	0.7578271340647578	1.4033066885046686	3.9747587953227126	1.0	False	0.5680962525750439	0.0	0.0
cor	2	4	109	0 days 01:09:53.070900000	0 days 01:09:53.200900000	0.13	True	10.0	146.0	0.4772727272727273	2.0	100.5509641873278	309.9260054659935	179.5184601289962	175.67556688548038	190.67556688548038	1.1204138806275403	-4.106769878739995	123.3382396684288	2299.843148415576	-35.307483940403316	-112.17437533227007	142.98779335889006	257.11606612403097	91.50103897864255	14.807017543859615	['Unclassified', 'Hover-Continuous-Mix', 'Unclassified']	129.34071265915986	0.4284428442844285	3.476689115697445	7.464481747330709	2.0	False	0.4204936705418511	0.0	0.0
cor	2	4	110	0 days 01:09:54.650900000	0 days 01:09:54.887566666	0.23666666600000005	True	11.0	189.0	0.4444444444444444	1.0	72.19251336898395	308.9060575530126	178.11401211663468	174.27111887311887	189.2711188731189	0.4847410007845953	-0.3893178846970161	111.07886352184285	669.2655748168812	-519.6008784578105	261.6539623990428	100.71012771429822	201.90169450856186	162.28023949567591	62.273643050972346	['Unclassified', 'Hover-Continuous-Mix', 'Continuous', 'Hover-Continuous-Mix', 'Unclassified', 'Fragmented-Continuous-Mix', 'Unclassified']	108.481885419886	0.35934769947583006	4.114257644229032	16.563390598561902	3.0	True	0.9783085095599467	0.11	0.4621848739495799	108.60855473970072	452.79877256038003	-237.8327701265136	-427.34786848266793	92.00661590417782	[195.98088261]	52.998330911610175	0.092	0.2	11.0	130.0	0.5555555555555556	107.43801652892564
cor	2	4	111	0 days 01:10:13.669566666	0 days 01:10:13.832900000	0.163333334	True	11.0	243.0	0.6785714285714286	2.5	134.70066518847008	310.08559233875775	191.3059120409163	186.85886114244911	201.85886114244911	0.17819766764623052	-0.0938329705078553	163.54679618943462	1158.9593661244694	41.162541843510645	-742.5297758361751	96.21012619476556	184.21389722739045	282.2391173999888	121.77488323713276	['Unclassified', 'Hover-Continuous-Mix', 'Continuous', 'Hover-Continuous-Mix', 'Unclassified', 'Fragmented-Continuous-Mix', 'Fragmented', 'Fragmented-Continuous-Mix', 'Unclassified', 'Hover-Continuous-Mix']	85.91454850158941	0.284593093455687	4.20465573241812	7.810539167368205	2.0	True	0.8049392398640249	0.006	0.03658536585365853	161.6722025519541	610.0526263832131	-748.7581723145995	-748.7581723145995	136.21750804628093	[272.37428587]	5.990065378516847	0.052000000000000005	0.055999999999999994	10.0	15.0	1.0	227.27272727272725
cor	2	4	112	0 days 01:10:13.937566666	0 days 01:10:13.983566666	0.046000000000000006	True	8.0	34.0	0.5	1.0	67.19367588932806	310.0761497421154	191.1277180761667	186.85886114244914	201.85886114244914	0.09440668133093964	-0.11237448991422476	87.17577912533447	0.0	-3.1634598322536633e-13	-4.745189748380495e-13	99.6830820171146	114.6830820171146	0.0	0.0	['Unclassified', 'Hover-Continuous-Mix']	97.46628420150424	0.32285837279380114	2.2045161522430567	3.578020501800673	2.0	False	0.2692342158070853	0.0	0.0
cor	2	4	113	0 days 01:10:15.644233333	0 days 01:10:15.781566666	0.137333333	True	11.0	129.0	0.34523809523809523	2.0	84.98023715415019	310.1491781097416	190.83990126612957	186.8586189391461	201.8586189391461	0.9817746226665601	-0.2289942330159657	73.16121097503311	470.4637894718715	428.06068080104563	-428.14272214016813	113.69740796411308	128.69740796411304	70.8468099646622	59.08369565534314	['Unclassified', 'Hover-Continuous-Mix', 'Unclassified']	118.90886672583522	0.3938872148084375	4.9815294163797565	14.170454109556015	2.0	False	0.7441337732383863	0.0	0.0
cor	2	4	114	0 days 01:10:17.641566666	0 days 01:10:17.708233333	0.066666667	True	11.0	69.0	0.5	2.0	95.04132231404958	310.1124868294752	190.4763766068376	186.63348336332177	201.63348336332177	0.06619019169248748	-0.049247625257335545	162.96205833774312	2684.293222771337	-2595.99242409879	578.4676487114975	150.42075083181948	279.2346936362406	38.1788648149589	38.1788648149589	['Unclassified', 'Hover-Continuous-Mix', 'Unclassified']	107.14990411469616	0.3549354935493549	4.4440927418713185	12.610961112461395	1.0	False	0.5543686543732529	0.0	0.0
cor	2	4	115	0 days 01:10:17.816233333	0 days 01:10:17.867566666	0.051333332999999995	True	8.0	19.0	0.0	0.5	33.216783216783206	310.1474229365052	190.49124474107865	186.64835149756286	201.64835149756286	0.15117531642684925	-0.03162327368827916	1.2701921090420984	0.0	-1.2190901638436369	-2.798445236224395e-13	185.37815938852074	200.37815938852074	0.0	0.0	['Hover-Continuous-Mix']	19.65819978279571	0.06511805026656513	1.824887345166524	3.1837929517794934	2.0	False	0.3838972852162825	0.0	0.0
cor	2	4	116	0 days 01:10:26.854233333	0 days 01:10:26.937566666	0.08333333300000001	True	8.0	27.0	0.0	0.0	29.220779220779217	310.1172014609387	187.4137037891808	183.570810545665	198.570810545665	0.9156573118654212	-1.0813611925044595	34.78713737268303	616.9590643274839	191.5369673582669	-193.90142021720825	148.78367317298202	163.78367317298202	76.99649122807	17.76842105263154	['Unclassified', 'Hover-Continuous-Mix', 'Unclassified', 'Fragmented-Continuous-Mix']	129.73535969158328	0.42975011786892975	1.8207096162382668	3.8577478126258815	2.0	False	0.7572727568869416	0.0	0.0
[truncated: 25,477 more rows]
[truncated: 155 more columns]
